# Supplementary material for: Light-induced arylation (alkylation) of N-sulfonylhydrazones with boronic acids
Source: Royal Society of Chemistry journal article supplement (doi:10.1039/d4cc00161c), 2024-01-01

**Supporting Information**  
**Light-Induced Arylation (Alkylation) of *N*-Sulfonylhydrazones**  
**with Boronic Acids**

Mohammad Junaid, Sharma Happy and Dongari Yadagiri\*

Laboratory of Organic Synthesis and Catalysis, Department of Chemistry, Indian Institute of  
Technology Roorkee, Roorkee-247667, Uttarakhand, India.

E-mail: yadagiri.dongari@cy.iitr.ac.in

**Table of Contents**

|                                                                       |     |
|-----------------------------------------------------------------------|-----|
| 1. General Information                                                | S2  |
| 2. Synthesis of Starting Materials                                    | S3  |
| 3. Reaction Optimization                                              | S8  |
| 4. General procedure for Visible Light-Induced Arylation (Alkylation) | S17 |
| 5. Synthetic application                                              | S31 |
| 7. UV-Vis spectra                                                     | S33 |
| 8. References                                                         | S34 |
| 9. Spectral data                                                      | S35 |

## 1. General Information

All chemicals were purchased from Aldrich, TCI, GLR Innovations and Avra chemicals in analytical grade and were used as supplied. All reaction were carried out under nitrogen atmosphere using oven dried reaction vials. Dry solvents were prepared by distilling over sodium metal with benzophenone, Calcium hydride and stored over molecular sieves 4 Å under N<sub>2</sub> atmosphere. All compounds were purified by column chromatography using silica gel (60-120 mesh). Thin layer chromatography was performed on 0.25 mm thick aluminium-baked silica gel plates purchased from Merck and visualized with ultraviolet ( $\lambda = 254$  nm). <sup>1</sup>H, <sup>13</sup>C{<sup>1</sup>H}, <sup>11</sup>B and <sup>19</sup>F NMR spectra were recorded on JEOL ECZ500R/S1 (500, 126, 160 and 471 MHz respectively) instrument. <sup>1</sup>H signals are referenced to residual CDCl<sub>3</sub> at 7.26 ppm. <sup>13</sup>C signals are referenced to CDCl<sub>3</sub> at 77.16 ppm. IR spectra were recorded on Bruker Alpha II compact FT-IR spectrophotometer. High resolution mass spectra quadrupole time-of-flight (HRMS-QTOF) was obtained in ESI mode. The UV-Vis spectrum of compounds was recorded using a UV-Vis spectrophotometer (Shimadzu-2600). The reaction vials were purchased from Aldrich. The small Air Circulator fan Vornado 133 were purchased from amazon.com. The 40W Purple LED lamps were used Kessil LED photoreaction lighting PR160L.

## 2. Synthesis of Starting Materials

### General procedure 2.1: Synthesis of *N*-sulfonylhydrazones **1** derived from aldehydes

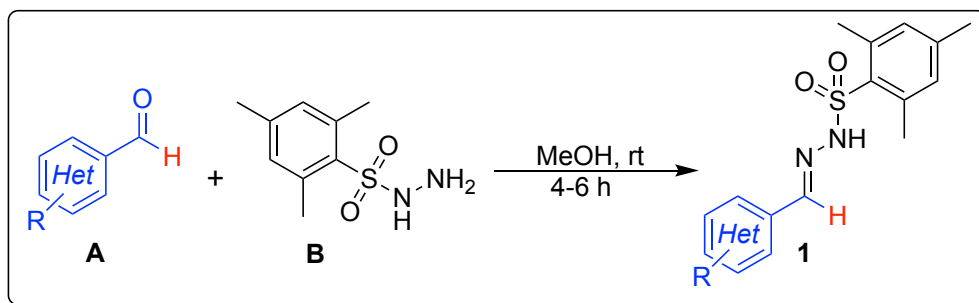

To a stirred solution of 2-mesitylenesulfonyl hydrazide **B** (1.5 mmol, 1.0 equiv) in MeOH (0.5 M), corresponding aldehydes **A** (1.5 mmol, 1.0 equiv) in MeOH (0.25 M) solution were added dropwise. The reaction mixture was stirred at room temperature until complete conversion was observed by TLC. Solvent was removed under reduced pressure by rotary evaporator and crude compound was recrystallized with hot methanol to get the desired product. Starting material is prepared from the reported literature.<sup>[1]</sup>

#### (*E*)-*N'*-(4-Methoxybenzylidene)-2,4,6-trimethylbenzenesulfonylhydrazide (**1a**)

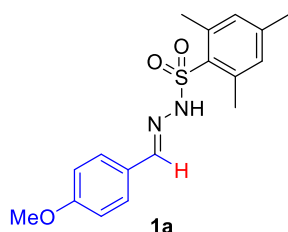

**1a** was prepared according to the general procedure **2.1** in 75% (359.0 mg) white solid compound. Purification done by recrystallization with hot MeOH. **TLC** (30% ethyl acetate in hexanes):  $R_f = 0.30$ ; **MP**: 167–168 °C; **IR neat** ( $\text{cm}^{-1}$ ): 3245, 2915, 1645, 1150;  **$^1\text{H}$  NMR** (500 MHz,  $\text{CDCl}_3$ ):  $\delta$  8.05 (br s, 1H), 7.69 (s, 1H), 7.45 (d,  $J = 9.0$  Hz, 2H), 6.98 (s, 2H), 6.85 (d,  $J = 9.1$  Hz, 2H), 3.80 (s, 3H), 2.73 (s, 6H), 2.29 (s, 3H);  **$^{13}\text{C}$  NMR** (126 MHz,  $\text{CDCl}_3$ ):  $\delta$  161.4, 146.9, 143.1, 140.3, 132.4, 132.0, 128.9, 126.1, 114.2, 55.4, 23.4, 21.1; **HRMS** (ESI/Q-TOF)  $m/z$ :  $[\text{M}+\text{H}]^+$  Calcd for  $\text{C}_{17}\text{H}_{21}\text{N}_2\text{O}_3\text{S}$  333.1267, Found 333.1267.

#### (*E*)-*N'*-(4-(Dimethylamino)-benzylidene)-2,4,6-trimethylbenzenesulfonylhydrazide (**1b**)

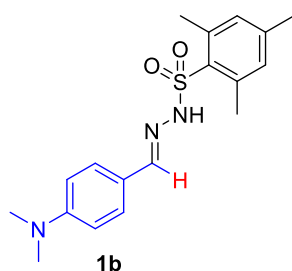

**1b** was prepared according to the general procedure **2.1** in 69% (357.0 mg) yellow solid compound. Purification done by recrystallization with hot MeOH. **TLC** (30% ethyl acetate in hexanes):  $R_f = 0.33$ ; **MP**: 157–158 °C; **IR neat** ( $\text{cm}^{-1}$ ): 3215, 2945, 1595, 1270;  **$^1\text{H}$  NMR** (500 MHz,  $\text{DMSO}-d_6$ ):  $\delta$  7.60 (s, 1H), 7.30 (d,  $J = 6.81$  Hz, 2H), 6.96 (s, 2H), 6.60 (d,  $J = 9.30$  Hz, 2H), 2.97 (s, 6H), 2.73 (s, 6H), 2.28 (s, 3H) (The -NH proton is not visible);  **$^{13}\text{C}$  NMR** (126 MHz,  $\text{DMSO}-d_6$ ):  $\delta$  190.5, 142.8, 140.2, 132.0, 128.8, 125.2, 112.1, 111.1, 40.5, 40.2, 23.4, 21.10; **HRMS** (ESI/Q-TOF)  $m/z$ :  $[\text{M}+\text{H}]^+$  Calcd for  $\text{C}_{18}\text{H}_{24}\text{N}_3\text{O}_2\text{S}$  346.1584, Found 346.1589.

(*E*)-*N'*-Benzylidene-2,4,6-trimethylbenzenesulfonohydrazide (**1c**)

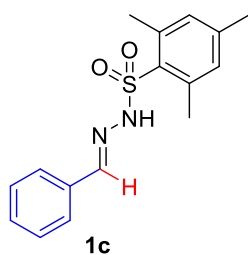

**1c** was prepared according to the general procedure **2.1** in 60% (271.0 mg) white solid compound. Purification done by recrystallization with hot MeOH. **TLC** (20% ethyl acetate in hexanes):  $R_f = 0.35$ ; **MP**: 155-156 °C; **IR** *neat* ( $\text{cm}^{-1}$ ): 3208, 2989, 1603, 1364;  $^1\text{H}$  **NMR** (500 MHz,  $\text{CDCl}_3$ ):  $\delta$  7.76 (br s, 1H), 7.52-7.50 (m, 2H), 7.34-7.32 (m, 3H), 6.97 (s, 2H), 2.74 (s, 6H), 2.29 (s, 3H) (The -NH proton is not visible);  $^{13}\text{C}$  **NMR** (126 MHz,  $\text{CDCl}_3$ ):  $\delta$  146.7, 143.2, 140.3, 133.4, 132.3, 132.1, 130.3, 128.7, 127.3, 23.4, 21.1; **HRMS** (ESI/Q-TOF)  $m/z$ :  $[\text{M}+\text{H}]^+$  Calcd for  $\text{C}_{16}\text{H}_{19}\text{N}_2\text{O}_2\text{S}$  303.1162, Found 303.1157.

(*E*)-*N'*-(4-Hydroxybenzylidene)-2,4,6-trimethylbenzenesulfonohydrazide (**1d**)

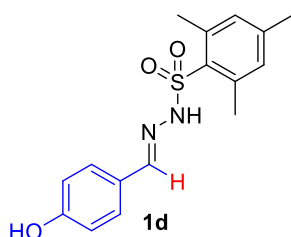

**1d** was prepared according to the general procedure **2.1** in 72% (343.0 mg) yellow solid compound. Purification done by recrystallization with hot MeOH. **TLC** (10% methanol in DCM):  $R_f = 0.30$ ; **MP**: 182-184°C; **IR** *neat* ( $\text{cm}^{-1}$ ): 3224, 2934, 2319, 1604, 1326;  $^1\text{H}$  **NMR** (500 MHz,  $\text{DMSO}-d_6$ ):  $\delta$  11.22 (s, 1H), 9.84 (s, 1H), 7.76 (s, 1H), 7.28 (d,  $J = 9$  Hz, 2H), 6.97 (s, 2H), 6.70 (d,  $J = 8.8$  Hz, 2H), 2.59 (s, 6H), 2.19 (s, 3H);  $^{13}\text{C}$  **NMR** (126 MHz,  $\text{DMSO}-d_6$ ):  $\delta$  159.7, 146.3, 142.6, 139.7, 133.9, 132.1, 128.7, 125.5, 116.1, 23.3, 20.9; **HRMS** (ESI/Q-TOF)  $m/z$ :  $[\text{M}+\text{H}]^+$  Calcd for  $\text{C}_{16}\text{H}_{19}\text{N}_2\text{O}_3\text{S}$  319.1111, Found 303.1112.

(*E*)-*N'*-(4-Chlorobenzylidene)-2,4,6-trimethylbenzenesulfonohydrazide (**1e**)

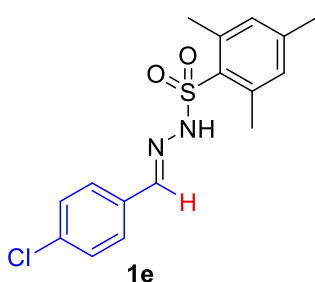

**1e** was prepared according to the general procedure **2.1** in 55% (277.0 mg) white solid compound. Purification done by recrystallization with hot MeOH. **TLC** (30% ethyl acetate in hexanes):  $R_f = 0.28$ ; **MP**: 144-145 °C; **IR** *neat* ( $\text{cm}^{-1}$ ): 3309, 2942, 1601, 1372;  $^1\text{H}$  **NMR** (500 MHz,  $\text{CDCl}_3$ ):  $\delta$  7.70 (s, 1H), 7.43 (d,  $J = 8.4$  Hz, 2H), 7.29 (d,  $J = 8.8$  Hz, 2H), 6.98 (s, 2H), 2.73 (s, 6H), 2.30 (s, 3H) (The -NH proton is not visible);  $^{13}\text{C}$  **NMR** (126 MHz,  $\text{CDCl}_3$ ):  $\delta$  191.2, 145.4, 143.42, 140.4, 136.3, 132.16, 131.8, 131.4, 131.1, 129.6, 129.0, 128.5, 23.4, 21.1; **HRMS** (ESI/Q-TOF)  $m/z$ :  $[\text{M}+\text{H}]^+$  Calcd for  $\text{C}_{16}\text{H}_{18}\text{ClN}_2\text{O}_2\text{S}$  337.0772, Found 337.0777.

(*E*)-2,4,6-Trimethyl-*N'*-(naphthalen-2-ylmethylene)benzenesulfonohydrazide (**1f**)

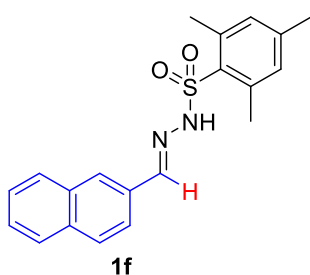

**1f** was prepared according to the general procedure **2.1** in 68% (359.0 mg) white solid compound. Purification done by recrystallization with hot MeOH. **TLC** (20% ethyl acetate in hexanes):  $R_f = 0.35$ ; **MP**: 190-191 °C; **IR neat (cm<sup>-1</sup>)**: 3216, 2949, 1596, 1319; **<sup>1</sup>H NMR** (500 MHz, CDCl<sub>3</sub>): (500 MHz CDCl<sub>3</sub>):  $\delta$  8.0 (s, 1H), 7.82-7.79 (m, 2H), 7.76 (d,  $J = 1.75$  Hz, 2H), 7.52-7.47 (m, 2H), 6.99 (s, 2H), 2.77 (s, 6H), 2.29 (s, 3H); **<sup>13</sup>C NMR** (126 MHz CDCl<sub>3</sub>):  $\delta$  146.9, 143.3, 140.4, 134.4, 132.46, 132.44, 133.0, 132.1, 131.0, 129.2, 128.7, 128.5, 128.0, 127.3, 126.8, 122.8, 23.4, 21.1; **HRMS** (ESI/Q-TOF)  $m/z$ : [M+H]<sup>+</sup> Calcd for C<sub>20</sub>H<sub>21</sub>N<sub>2</sub>O<sub>2</sub>S 353.1318, Found 353.1321.

**(E)-2,4,6-Trimethyl-*N'*-(pyridin-3-ylmethylene) benzenesulfonohydrazide (1g)**

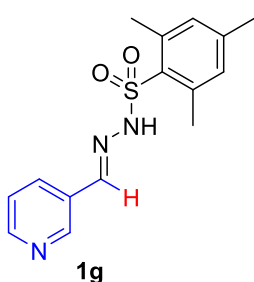

**1g** was prepared according to the general procedure **2.1** in 68% (309.0 mg) white solid compound. Purification done by recrystallization with hot MeOH. **TLC** (10% Methanol in DCM):  $R_f = 0.28$ ; **MP**: 188 – 189 °C; **IR neat (cm<sup>-1</sup>)**: 3309, 2388, 1606, 1326; **<sup>1</sup>H NMR** (500 MHz, DMSO-d<sub>6</sub>):  $\delta$  11.80 (br s, 1H), 8.61 (d,  $J = 3$  Hz, 1H), 8.49 (dd,  $J = 1.8, 4.9$  Hz, 1H), 7.91 (s, 1H), 7.83-7.81 (m, 1H), 7.38-7.35 (m, 1H), 7.00 (s, 2H), 2.60 (s, 6H), 2.19 (s, 3H); **<sup>13</sup>C NMR** (126 MHz, DMSO-d<sub>6</sub>):  $\delta$  151.0, 148.6, 142.95, 142.93, 139.7, 133.7, 133.4, 132.1, 130.2, 124.4, 23.2, 20.9; **HRMS** (ESI/Q-TOF)  $m/z$ : [M+H]<sup>+</sup> Calcd for C<sub>15</sub>H<sub>18</sub>N<sub>3</sub>O<sub>2</sub>S 304.1114, Found 304.1113.

**(E)-4-((2-(Mesitylsulfonyl)hydrazineylidene)methyl)phenyl 2-(4-isobutylphenyl)propanoate (1h)**

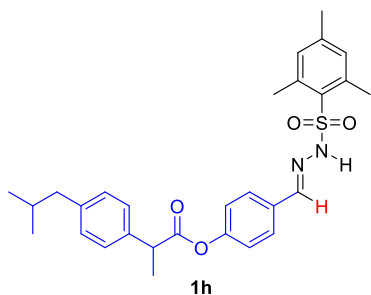

**1h** was prepared according to the general procedure **2.1** in 68% (516.0 mg) white solid compound. Purification done by recrystallization with hot MeOH. **TLC** (30% ethyl acetate in hexanes):  $R_f = 0.32$ ; **MP**: 162-163 °C; **IR neat (cm<sup>-1</sup>)**: 3309, 2388, 1606, 1326; **<sup>1</sup>H NMR** (500 MHz, CDCl<sub>3</sub>):  $\delta$  7.4 (d,  $J = 9$  Hz, 2H), 7.20 (d,  $J = 8.3$  Hz, 2H), 7.11 (d,  $J = 8.3$  Hz, 2H), 6.96 (d,  $J = 7.3$  Hz, 2H), 6.94 (s, 2H), 3.9 (q, 1H), 2.71 (s, 6H), 2.4 (d,  $J = 7.1$  Hz, 2H), 2.2 (s, 3H), 1.90-1.82 (m, 1H), 1.60 (d,  $J = 6.5$  Hz, 3H), 0.9 (d,  $J = 6.2$  Hz, 6H) (The -NH proton is not visible); **<sup>13</sup>C NMR** (126 MHz, CDCl<sub>3</sub>):  $\delta$  173.2, 152.3, 145.5, 143.2, 141.0, 140.3, 137.0, 132.3, 132.1, 131.0, 129.7, 128.3, 127.3, 121.9, 45.3, 45.1, 30.3, 23.4, 22.5, 21.1, 18.5; **HRMS** (ESI/Q-TOF)  $m/z$ : [M+H]<sup>+</sup> Calcd for C<sub>29</sub>H<sub>35</sub>N<sub>2</sub>O<sub>4</sub>S 507.2312, Found 507.2315.

## General procedure 2.2: Synthesis of *N*-sulfonylhydrazones **4** derived from ketones

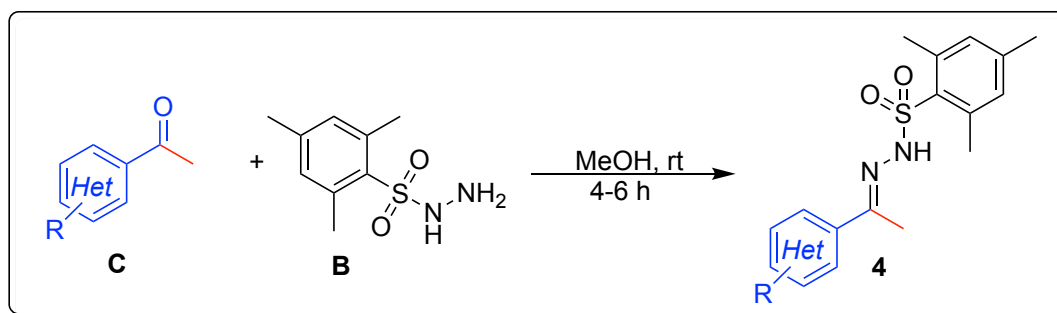

To a stirred solution of 2-mesitylenesulfonyl hydrazide **B** (1.5 mmol, 1.0 equiv) in MeOH (0.5 M), corresponding ketones **C** (1.5 mmol, 1.0 equiv) in MeOH (0.25 M) solution were added dropwise. The reaction mixture was stirred at room temperature until complete conversion was observed by TLC. Solvent was removed under reduced pressure by rotary evaporator and crude compound was recrystallised with hot methanol to get the desired product. Starting material is prepared from the reported literature.<sup>[1]</sup>

If crude product is sticky then washed two to three times with minimum amount of hexane and diethyl ether. Solvent was removed under reduced pressure by rotary evaporator and then recrystallized with hot MeOH.

### (*E*)-2,4,6-trimethyl-*N'*-(1-phenyl-ethylidene)-benzenesulfonohydrazide (**4a**)

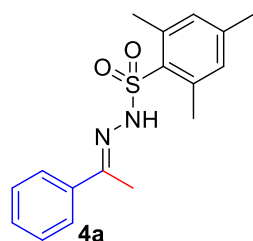

**4a** was prepared according to the general procedure **2.2** in 68% (321.0mg) white solid compound. Purification done by recrystallisation with hot MeOH. TLC (20% ethylacetate in hexanes):  $R_f = 0.33$ ; MP: 110-112 °C; IR neat ( $\text{cm}^{-1}$ ): 3325, 3130, 2940, 1603, 1358, 1140;  $^1\text{H}$  NMR:  $\delta$  7.04 (br s, 1H), 7.58-7.55 (m, 2H), 7.32-7.29 (m, 3H), 6.90 (s, 2H), 2.75 (s, 6H), 2.28 (s, 3H), 2.16 (s, 3H);  $^{13}\text{C}$  NMR (126 MHz  $\text{CDCl}_3$ ):  $\delta$  151.0, 143.0, 140.4, 137.4, 132.4, 131.9, 129.5, 128.3, 126.2, 23.4, 21.1, 13.0; HRMS (ESI/Q-TOF)  $m/z$ :  $[\text{M}+\text{H}]^+$  Calcd for  $\text{C}_{13}\text{H}_{21}\text{N}_2\text{O}_2\text{S}$  317.1323, Found 317.1323.

### (*E*)-*N'*-(1-(4-methoxyphenyl)ethylidene)-2,4,6-trimethylbenzenesulfonohydrazide (**4b**)

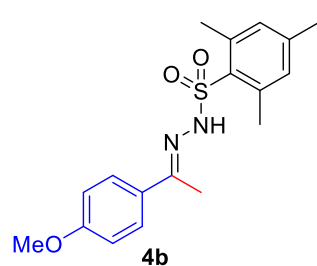

**4b** was prepared according to the general procedure **2.2** in 68% (352.0 mg) white solid compound. Purification done by recrystallization with hot MeOH. TLC (30% ethylacetate in hexanes):  $R_f = 0.30$ ; MP: 125-127 °C;  $^1\text{H}$  NMR (500 MHz,  $\text{CDCl}_3$ ):  $\delta$  7.50 (d,  $J = 8.5$  Hz, 2H), 6.92 (s, 2H), 6.80 (d,  $J = 9.0$  Hz, 2H), 3.81 (s, 3H), 2.70 (s, 6H), 2.22 (s, 3H), 2.10 (s, 3H) (The -NH proton is not visible);  $^{13}\text{C}$  NMR (126 MHz,  $\text{CDCl}_3$ ):  $\delta$  160.8, 151.1, 143.0, 140.4, 132.0, 130.7, 130.0, 127.7, 113.7, 55.4, 23.4, 21.1, 13.01; HRMS (ESI/Q-TOF)  $m/z$ :  $[\text{M}+\text{H}]^+$  Calcd for  $\text{C}_{18}\text{H}_{22}\text{N}_2\text{O}_3\text{S}$  347.1427, Found 347.1427.

(*E*)-*N'*-(1-(1H-indol-2-yl)ethylidene)-2,4,6-trimethylbenzenesulfonohydrazide (**4c**)

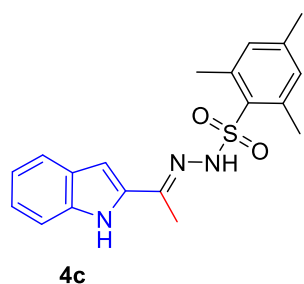

**4c** was prepared according to the general procedure **2.2** in 70% (533.0 mg) yellow solid compound. Purification done by recrystallization with methanol. TLC (10% Methanol in DCM):  $R_f = 0.30$ ; MP: 220-221 °C; IR neat ( $\text{cm}^{-1}$ ): 3362, 3226, 2944, 1603, 1358;  $^1\text{H}$  NMR (500 MHz,  $\text{CDCl}_3$ ):  $\delta$  11.36 (s, 1H), 10.14 (s, 1H), 7.74 (d,  $J = 3.0$  Hz, 1H), 7.66 (d,  $J = 8.7$  Hz, 1H), 7.31 (d,  $J = 8.4$  Hz, 1H), 7.09-7.05 (m, 3H), 6.87 (t,  $J = 8.25$  Hz, 1H), 2.66 (s, 6H), 2.26 (s, 3H), 2.22 (s, 3H);  $^{13}\text{C}$  NMR (126 MHz,  $\text{CDCl}_3$ ):  $\delta$  153.5, 143.12, 140.2, 136.4, 132.5, 132.1, 132.0, 130.2, 129.9, 129.8, 128.4, 128.2, 127.5, 23.27, 21.15; HRMS (ESI/Q-TOF)  $m/z$ :  $[\text{M}+\text{H}]^+$  Calcd for  $\text{C}_{19}\text{H}_{22}\text{N}_3\text{O}_2\text{S}$  356.1427, Found 356.1429.

**General procedure 2.3:** Synthesis of *N*-sulfonylhydrazones **6** derived from terephthalaldehyde.

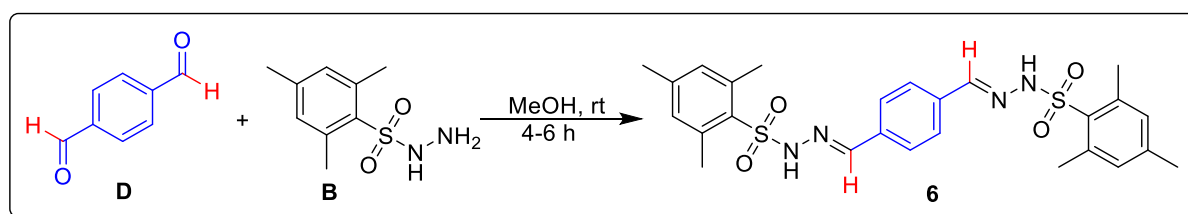

To a stirred solution of 2-mesitylenesulfonyl hydrazide **B** (1.0 mmol, 1.0 equiv) in MeOH (0.5 M), solution of corresponding terephthalaldehyde **D** (0.5 mmol, 0.5 equiv) in MeOH (0.25 M) solution were added dropwise. The reaction mixture was stirred at room temperature until complete conversion was observed by TLC. Solvent was removed in under reduced pressure by rotary evaporator and crude compound was washed two times with MeOH to obtained the desired product. Starting material is prepared from the reported literature.<sup>[1]</sup>

*N,N'*-((1*E*,1'*E*)-1,4-phenylenebis(methanelylidene))bis(2,4,6-trimethylbenzenesulfonohydrazide) (**6**)

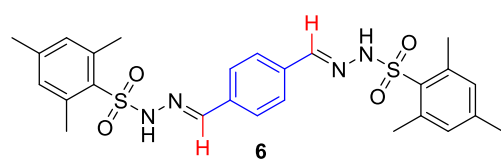

**6** was prepared according to the general procedure **2.3** in 70% (368.0 mg) white solid compound. Purification done by washing with methanol. TLC (10% Methanol in DCM):  $R_f = 0.28$ ; MP: 203-204 °C; IR neat ( $\text{cm}^{-1}$ ): 3219, 2945, 1695, 1101;  $^1\text{H}$  NMR (500 MHz  $\text{DMSO}-d_6$ ):  $\delta$  11.66 (s, 2H), 7.83 (s, 2H), 7.45 (s, 4H), 7.00 (s, 4H), 2.59 (s, 12H), 2.19 (s, 6H) (The -NH proton is visible,);  $^{13}\text{C}$  NMR (126 MHz,  $\text{DMSO}-d_6$ ):  $\delta$  149.9, 142.8, 139.7, 135.5, 133.8, 132.1, 127.3, 23.26, 20.9; HRMS (ESI/Q-TOF)  $m/z$ :  $[\text{M}+\text{H}]^+$  Calcd for  $\text{C}_{26}\text{H}_{31}\text{N}_4\text{O}_4\text{S}_2$  527.1781, Found 527.1784.

*N'*-(Diphenylmethylene)-2,4,6-trimethylbenzenesulfonohydrazide (**8**)

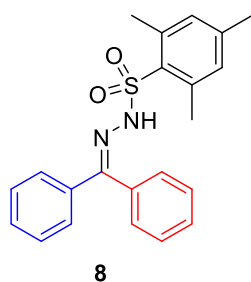

**8** was prepared according to the general procedure **2.2** in 64% (362.8 mg) white solid compound. Purification done by recrystallization with methanol. TLC (20% ethyl acetate in hexanes):  $R_f = 0.35$ ; MP: 130-131 °C; IR neat ( $\text{cm}^{-1}$ ): 3335, 2926, 2900, 1706, 1457;  $^1\text{H}$  NMR (500 MHz,  $\text{CDCl}_3$ ):  $\delta$  7.68 (br s, 1H), 7.54-7.51 (m, 3H), 7.38-7.36 (m, 2H), 7.30-7.24 (m, 3H), 7.16-7.14 (m, 2H), 6.97 (s, 2H), 2.65 (s, 6H), 2.29 (s, 3H);  $^{13}\text{C}$  NMR (126 MHz,  $\text{CDCl}_3$ ):  $\delta$  153.5, 143.1, 140.1, 136.5, 132.5, 132.0, 131.1, 130.2, 129.9, 129.8, 128.3, 128.2, 127.5, 23.2, 21.1; HRMS (ESI/Q-TOF)  $m/z$ :  $[\text{M}+\text{H}]^+$  Calcd for  $\text{C}_{22}\text{H}_{23}\text{N}_3\text{O}_2\text{S}$  379.1475, Found 379.1470.

### 3. Reaction optimization

#### 3.1 Optimization of diarylmethanes (3)

##### 3.1.1 Solvent optimization.

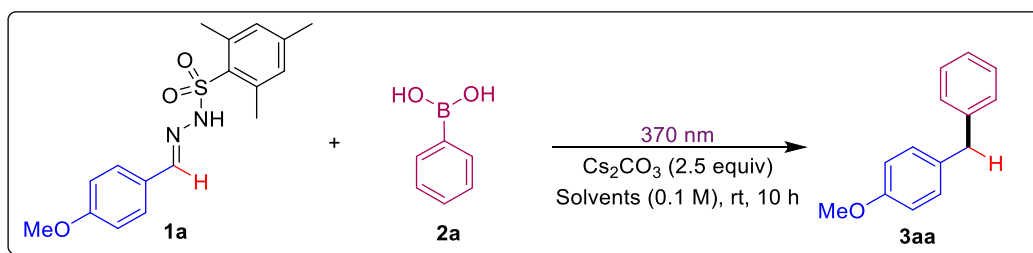

To an oven dried 5 mL glass vial was charged with magnetic stir bar, *N*-mesitylene-sulfonylhydrazone **1a** (33.2 mg, 0.1 mmol, 1.0 equiv) derived from aldehyde was added, then  $\text{Cs}_2\text{CO}_3$  (81.5 mg, 0.25 mmol, 2.5 equiv) and arylboronic acid **2a** (18.3 mg, 0.15 mmol, 1.5 equiv) were added followed by dry solvent (0.1 M, 1mL) under nitrogen atmosphere. The reaction mixture was stirred in presence of 370 nm LEDs at room temperature using fan (we control the temperature by using the fan, temperature of the reaction reaching  $\sim 35^\circ\text{C}$ ) for 10 h. Upon the complete consumption of the starting materials, the reaction mixture was diluted with ethyl acetate and then passed through the celite pad the solvents were removed under reduced pressure and residue submitted for  $^1\text{H}$  NMR, yield of **3aa** was determined by using  $\text{CH}_2\text{Br}_2$  as an internal standard.

| Entry | Dry Solvents (0.1 M) | NMR Yield ( <b>3aa</b> ) <sup>[a]</sup> |
|-------|----------------------|-----------------------------------------|
| 1     | DCM                  | 63%                                     |
| 2     | DCE                  | 93% (90%) <sup>b</sup>                  |
| 3     | 1,4-dioxane          | 69%                                     |

|    |                    |      |
|----|--------------------|------|
| 4  | CH <sub>3</sub> CN | 4.0% |
| 5  | Toluene            | 60%  |
| 6  | Mesitylene         | 62%  |
| 7  | Trifluoro- toluene | 60%  |
| 8  | DMF                | ND   |
| 9  | THF                | 62%  |
| 10 | Chlorobenzene      | 56%  |
| 11 | Benzene            | 56%  |

<sup>[a]</sup>Crude yield and <sup>[b]</sup>isolated yield of **3aa**

### 3.1.2: Base optimization.

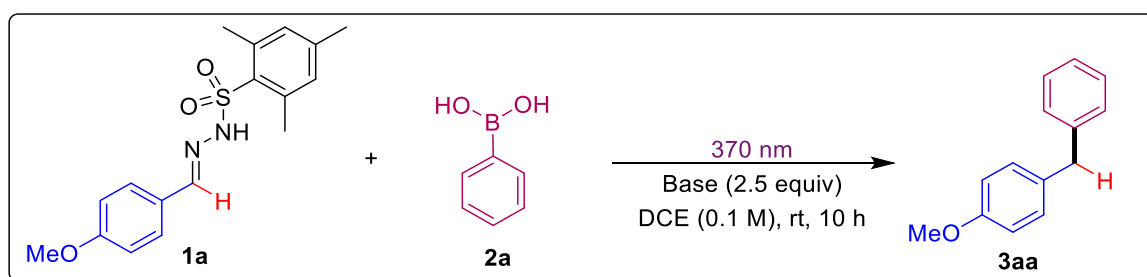

To an oven dried 5 mL glass vial was charged with magnetic stir bar, *N*-mesitylene-sulfonylhydrazone **1a** (33.2 mg, 0.1 mmol, 1.0 equiv) derived from aldehyde was added, then base (xx mg, 0.25 mmol, 2.5 equiv) and arylboronic acid **2a** (18.3 mg, 0.15 mmol, 1.5 equiv) were added followed by DCE solvent (0.1 M, 1mL) under nitrogen atmosphere. The reaction mixture was stirred in presence of 370 nm LEDs at room temperature using fan (we control the temperature by using the fan the temperature of the reaction reaching ~35 °C) for 10 h. Upon the complete consumption of the starting materials, the reaction mixture was diluted with ethyl acetate and then passed through the celite pad the solvents were removed under reduced pressure and residue submitted for <sup>1</sup>H NMR, yield of **3aa** was determined by using CH<sub>2</sub>Br<sub>2</sub> as an internal standard.

| Entry | Base                            | NMR Yield ( <b>3aa</b> ) <sup>[a]</sup> |
|-------|---------------------------------|-----------------------------------------|
| 1     | No base                         | ND                                      |
| 2     | Na <sub>2</sub> CO <sub>3</sub> | ND                                      |
| 3     | K <sub>2</sub> CO <sub>3</sub>  | 26%                                     |
| 4     | Cs <sub>2</sub> CO <sub>3</sub> | 93% (90%) <sup>b</sup>                  |

|    |                                   |      |
|----|-----------------------------------|------|
| 5  | K <sub>3</sub> PO <sub>4</sub>    | 80%  |
| 6  | KHCO <sub>3</sub>                 | 2.0% |
| 7  | NaOH                              | 32%  |
| 8  | KOH                               | 24%  |
| 9  | NaOMe                             | 19%  |
| 10 | NaNH <sub>2</sub>                 | 45%  |
| 11 | CH <sub>3</sub> CO <sub>2</sub> K | 12%  |
| 12 | NaH                               | 15%  |
| 13 | CsF                               | 28%  |
| 14 | Li <sup>t</sup> BuO               | 6%   |
| 15 | DIPEA                             | 8%   |
| 16 | DMAP                              | 16%  |
| 17 | Et <sub>3</sub> N                 | 24%  |
| 18 | DBU                               | 10%  |

<sup>[a]</sup>Crude yield and <sup>[b]</sup>isolated yield of **3aa**

### 3.1.3: Optimization of light source (LEDs nm)

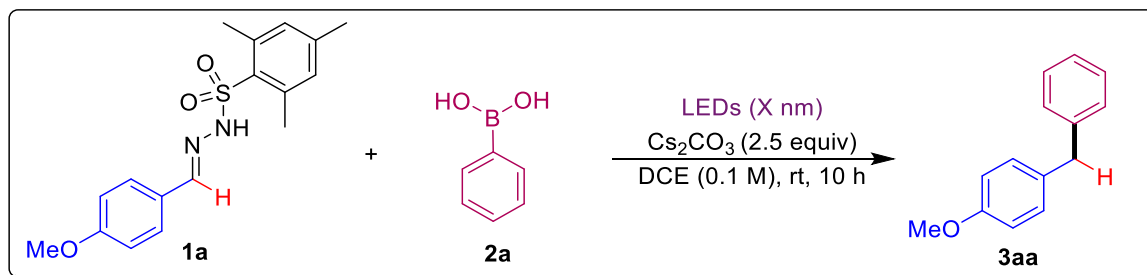

To an oven dried 5 mL glass vial was charged with magnetic stir bar, *N*-mesitylene-sulfonylhydrazone **1a** (33.2 mg, 0.1 mmol, 1.0 equiv) derived from aldehyde was added, then Cs<sub>2</sub>CO<sub>3</sub> (81.5 mg, 0.25 mmol, 2.5 equiv) and arylboronic acid **2a** (18.3 mg, 0.15 mmol, 1.5 equiv) were added followed by DCE solvent (0.1 M, 1mL) under nitrogen atmosphere. The reaction mixture was stirred in presence of various light sources LEDs at room temperature using fan (we control the temperature by using the fan the temperature of the reaction reaching ~35 °C) for 10 h and we also tried the reaction under dark condition in presence of 370 nm LEDs by covering of two layers of aluminium foil upon glass vial. Upon the complete consumption of the starting materials, the reaction mixture was diluted with ethyl acetate and then passed through

the celite pad the solvents were removed under reduced pressure and residue submitted for  $^1\text{H}$  NMR, yield of **3aa** was determined by using  $\text{CH}_2\text{Br}_2$  as an internal standard.

| Entry | LEDs (nm)      | NMR Yield ( <b>3aa</b> ) <sup>[a]</sup> |
|-------|----------------|-----------------------------------------|
| 1     | 370 nm         | 93% (90%) <sup>b</sup>                  |
| 2     | 390 nm         | 72%                                     |
| 3     | 427 nm         | 5%                                      |
| 4     | 440 nm         | 5%                                      |
| 5     | 456 nm         | ND                                      |
| 6     | Dark and 40 °C | 20%                                     |

<sup>[a]</sup>Crude yield and <sup>[b]</sup>isolated yield of **3aa**

## 3.2. Optimization of diarylalkylmethanes (**5**)

### 3.2.1. Optimization of solvents.

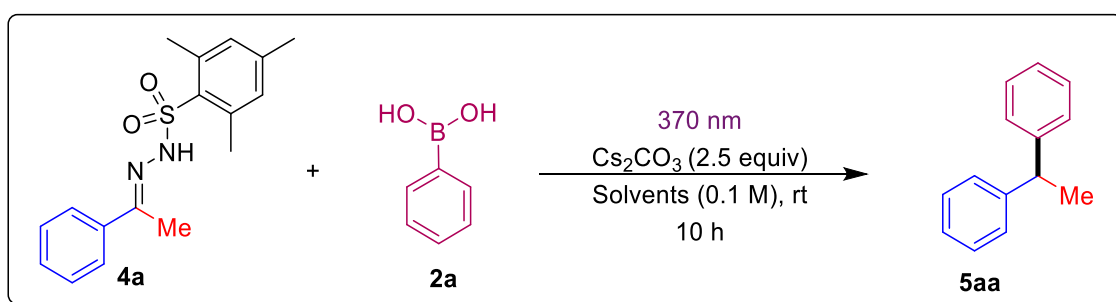

To an oven dried 5 mL glass vial was charged with magnetic stir bar, *N*-mesitylene-sulfonylhydrazone **4a** (31.6 mg, 0.1 mmol, 1.0 equiv) derived from aldehyde was added, then  $\text{Cs}_2\text{CO}_3$  (81.5 mg, 0.25 mmol, 2.5 equiv) and arylboronic acid **2a** (18.3 mg, 0.15 mmol, 1.5 equiv) were added followed by dry solvent (0.1 M, 1mL) under nitrogen atmosphere. The reaction mixture was stirred in presence of 370 nm LEDs at room temperature using fan (we control the temperature by using the fan the temperature of the reaction reaching  $\sim 35^\circ\text{C}$ ) for 10 h. Upon the complete consumption of the starting materials, the reaction mixture was diluted with ethyl acetate and then passed through the celite pad the solvents were removed under reduced pressure and residue submitted for  $^1\text{H}$  NMR, yield of **5aa** was determined by using  $\text{CH}_2\text{Br}_2$  as an internal standard.

| Entry | Dry Solvents (0.1 M) | NMR Yield ( <b>5aa</b> ) <sup>[a]</sup> |
|-------|----------------------|-----------------------------------------|
| 1     | DCM                  | 64% (63%) <sup>b</sup>                  |
| 2     | DCE                  | 35%                                     |

|   |             |     |
|---|-------------|-----|
| 3 | 1,4-dioxane | 10% |
| 4 | Toluene     | 50% |
| 5 | Mesitylene  | 32% |
| 6 | THF         | 12% |

<sup>[a]</sup>Crude yield and <sup>[b]</sup>isolated yield of **3aa**

### 3.3 Optimization of bis(1,4-diaryl/naphthylmethyl)benzenes (**7**).

#### 3.3.1 Optimization of solvents.

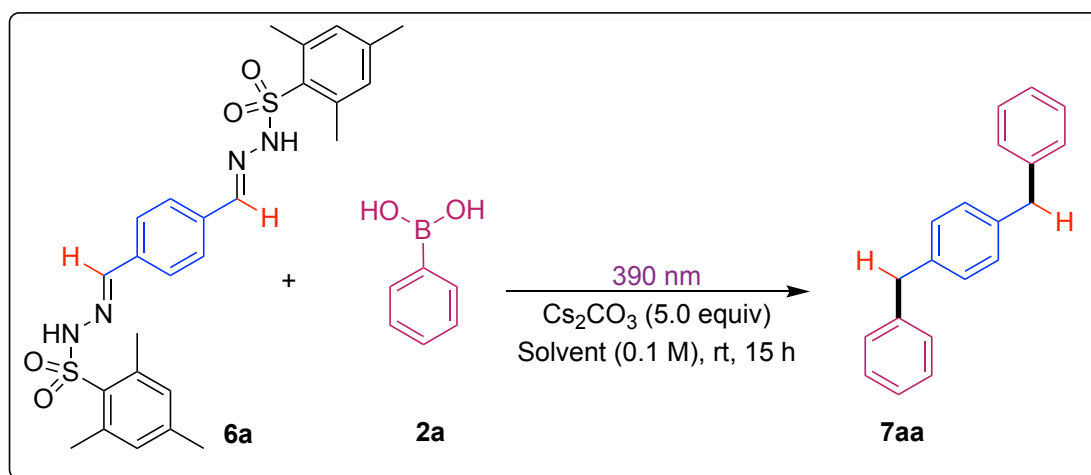

To an oven dried 5 mL glass vial was charged with magnetic stir bar, *N*-mesitylene-sulfonylhydrazone **6a** (52.7 mg, 0.1 mmol, 1.0 equiv) derived from aldehyde was added, then  $\text{Cs}_2\text{CO}_3$  (163.0 mg, 0.5 mmol, 5 equiv) and arylboronic acid **2a** (36.6 mg, 0.3 mmol, 3.0 equiv) were added followed by dry solvent (0.1 M, 1mL) under nitrogen atmosphere. The reaction mixture was stirred in presence of 370 nm LEDs at room temperature using fan (we control the temperature by using the fan the temperature of the reaction reaching  $\sim 35^\circ\text{C}$ ) for 15 h. Upon the complete consumption of the starting materials, the reaction mixture was diluted with ethyl acetate and then passed through the celite pad the solvents were removed under reduced pressure and residue submitted for  $^1\text{H}$  NMR, yield of **7aa** was determined by using  $\text{CH}_2\text{Br}_2$  as an internal standard.

| Entry | Solvents   | NMR Yield ( <b>7aa</b> ) <sup>a</sup> |
|-------|------------|---------------------------------------|
| 1     | Mesitylene | ND                                    |
| 2     | Toluene    | 22%                                   |
| 3     | DCM        | 3.0 %                                 |

|   |                           |     |
|---|---------------------------|-----|
| 4 | 1,4-dioxane               | ND  |
| 5 | DMF                       | ND  |
| 6 | THF                       | 12% |
| 7 | CHCl <sub>3</sub>         | 17% |
| 8 | Toluene: H <sub>2</sub> O | 18% |

<sup>[a]</sup>Crude yield

### Scheme 3.3.2: Base optimization.

To an oven dried 5 mL glass vial was charged with magnetic stir bar, *N*-mesitylene-sulfonylhydrazone **6a** (52.7 mg, 0.1 mmol, 1.0 equiv) derived from aldehyde was added, then base (163.0 mg, 0.25 mmol, 2.5 equiv) and arylboronic acid **2a** (36.6 mg, 0.3 mmol, 3.0 equiv) were added followed by toluene solvent (0.1 M, 1mL) under nitrogen atmosphere. The reaction mixture was stirred in presence of 370 nm LEDs at room temperature using fan (we control the temperature by using the fan the temperature of the reaction reaching ~35 °C) for 15 h. Upon the complete consumption of the starting materials, the reaction mixture was diluted with ethyl acetate and then passed through the celite pad the solvents were removed under reduced pressure and residue submitted for <sup>1</sup>H NMR, yield of **7aa** was determined by using CH<sub>2</sub>Br<sub>2</sub> as an internal standard.

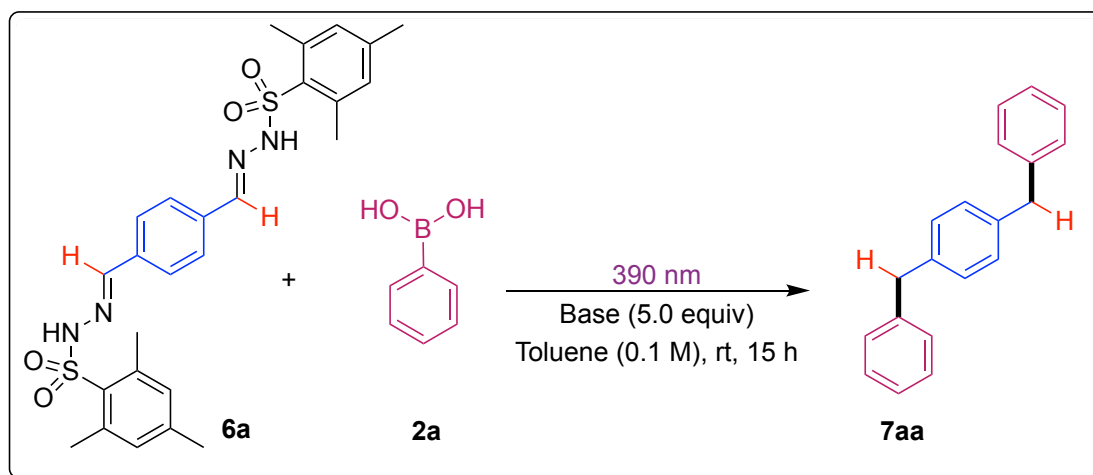

| Entry | Mixture of base (1:1)                              | NMR Yield ( <b>7aa</b> ) <sup>a</sup> |
|-------|----------------------------------------------------|---------------------------------------|
| 1     | Cs <sub>2</sub> CO <sub>3</sub>                    | 25%                                   |
| 2     | Cs <sub>2</sub> CO <sub>3</sub> : DBU              | ND                                    |
| 3     | Cs <sub>2</sub> CO <sub>3</sub> : H <sub>2</sub> O | 33%                                   |

**Scheme 3.3.3:** Optimization of light source (LEDs nm).

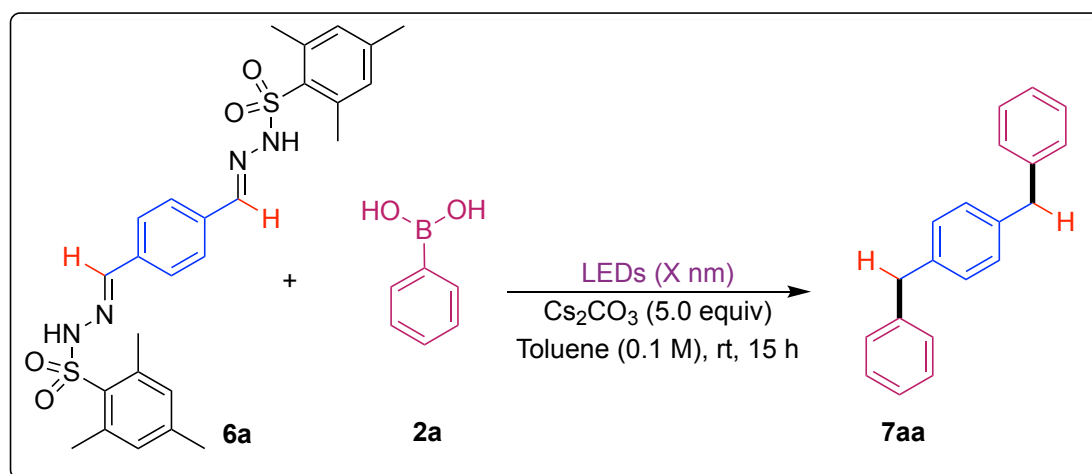

To an oven dried 5 mL glass vial was charged with magnetic stir bar, *N*-mesitylene-sulfonylhydrazone **6a** (52.7 mg, 0.1 mmol, 1.0 equiv) derived from aldehyde was added, then Cs<sub>2</sub>CO<sub>3</sub> (163.0 mg, 0.5 mmol, 5 equiv) and arylboronic acid **2a** (36.6 mg, 0.3 mmol, 3.0 equiv) were added followed by toluene solvent (0.1 M, 1mL) under nitrogen atmosphere. The reaction mixture was stirred in presence of various light sources LEDs at room temperature using fan (we control the temperature by using the fan the temperature of the reaction reaching ~35 °C) for 15 h. Upon the complete consumption of the starting materials, the reaction mixture was diluted with ethyl acetate and then passed through the celite pad the solvents were removed under reduced pressure and residue submitted for <sup>1</sup>H NMR, yield of **7aa** was determined by using CH<sub>2</sub>Br<sub>2</sub> as an internal standard.

| Entry | LEDs (nm) | NMR Yield ( <b>7aa</b> ) <sup>a</sup> |
|-------|-----------|---------------------------------------|
| 1     | 370 nm    | 30%                                   |
| 2     | 390 nm    | 70%                                   |
| 3     | 427 nm    | ND                                    |
| 4     | 440 nm    | ND                                    |
| 5     | 456 nm    | ND                                    |

<sup>[a]</sup>Crude yield

### 3.4 Synthesis of triarylmethanes (9).

#### 3.4.1: Optimization of solvents.

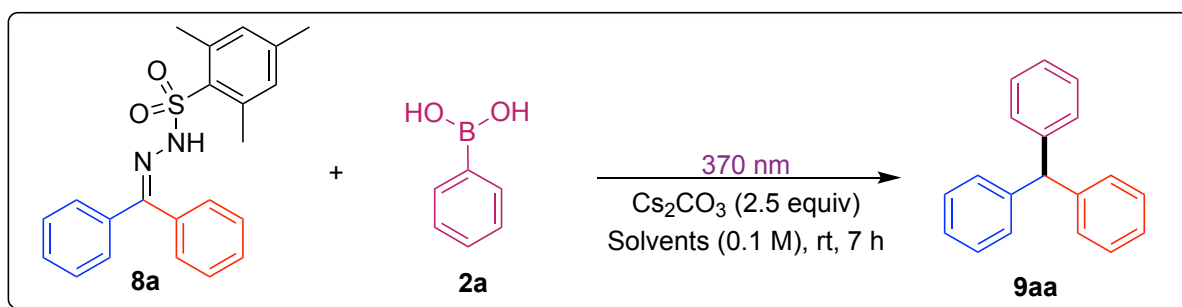

To an oven dried 5 mL glass vial was charged with magnetic stir bar, *N*-mesitylene-sulfonylhydrazone **8a** (37.8 mg, 0.1 mmol, 1.0 equiv) derived from aldehyde was added, then  $\text{Cs}_2\text{CO}_3$  (81.5 mg, 0.25 mmol, 2.5 equiv) and aryl boronic acid **2a** (18.3 mg, 0.15 mmol, 1.5 equiv) were added followed by dry solvent (0.1 M, 1 mL) under nitrogen atmosphere. The reaction mixture was stirred in presence of 370 nm LEDs at room temperature using fan (we control the temperature by using the fan the temperature of the reaction reaching  $\sim 35^\circ\text{C}$ ) for 7 h. Upon the complete consumption of the starting materials, the reaction mixture was diluted with ethyl acetate and then passed through the celite pad the solvents were removed under reduced pressure and residue submitted for  $^1\text{H}$  NMR, yield of **9aa** was determined by using  $\text{CH}_2\text{Br}_2$  as internal standard.

| Entry | Solvents   | NMR Yield ( <b>9aa</b> ) <sup>a</sup> |
|-------|------------|---------------------------------------|
| 1     | Mesitylene | 15%                                   |
| 2     | Toluene    | 22%                                   |
| 3     | DCM        | 28%                                   |
| 4     | DCE        | 20%                                   |

<sup>[a]</sup>Crude yield

#### 3.4.2: Optimization of light source (LEDs nm).

To an oven dried 5 mL glass vial was charged with magnetic stir bar, *N*-mesitylene-sulfonylhydrazone **8a** (37.8 mg, 0.1 mmol, 1.0 equiv) derived from aldehyde was added, then  $\text{Cs}_2\text{CO}_3$  (0.25 mmol, 2.5 equiv) and aryl boronic acid **2a** (18.3 mg, 0.15 mmol, 1.5 equiv) were added followed by dry solvent (0.1 M, 1mL) under nitrogen atmosphere. The reaction mixture was stirred in presence of various LEDs at room temperature using fan (we control the temperature by using the fan the temperature of the reaction reaching  $\sim 35^\circ\text{C}$ ) for 7 h.

Upon the complete consumption of the starting materials, the reaction mixture was diluted with ethyl acetate and then passed through the celite pad the solvents were removed under reduced pressure and residue submitted for  $^1\text{H}$  NMR, yield of **9aa** was determined by using  $\text{CH}_2\text{Br}_2$  as internal standard.

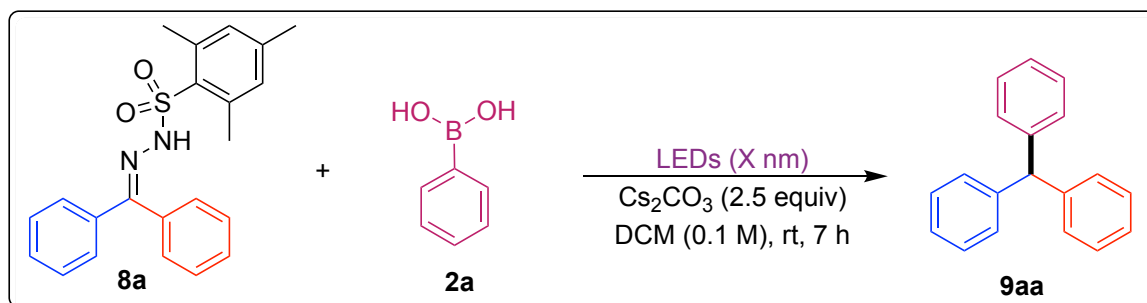

| Entry | LEDs (nm) | NMR Yield ( <b>9aa</b> ) <sup>a</sup> |
|-------|-----------|---------------------------------------|
| 1     | 370 nm    | 28%                                   |
| 2     | 390 nm    | 35%                                   |
| 3     | 427 nm    | 20%                                   |
| 4     | 440 nm    | ND                                    |
| 5     | 456 nm    | ND                                    |

<sup>[a]</sup>Crude yield

### 3.4.3: Optimization of equivalent of $\text{Cs}_2\text{CO}_3$

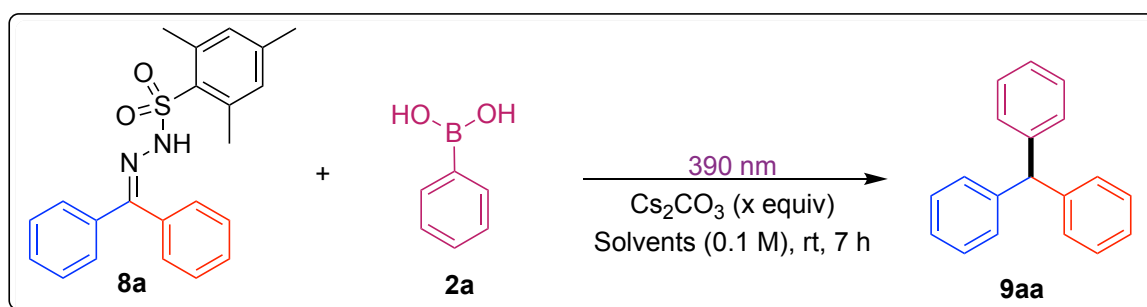

To an oven dried 5 mL glass vial was charged with magnetic stir bar, *N*-mesitylenesulphonylhydrazones **8a** (37.8 mg, 0.1 mmol, 1.0 equiv) derived from aldehyde was added, then  $\text{Cs}_2\text{CO}_3$  (xx equiv) and arylboronic acid **2a** (18.3 mg, 0.15 mmol, 1.5 equiv) were added followed by dry solvent (0.1 M, 1mL) under nitrogen atmosphere. The reaction mixture was stirred in presence of 370 nm LEDs at room temperature using fan (we control the temperature by using the fan the temperature of the reaction reaching  $\sim 35^\circ\text{C}$ ) for 7 h. Upon the complete consumption of the starting materials, the reaction mixture was diluted with ethyl

acetate and then passed through the celite pad the solvents were removed under reduced pressure and residue submitted for  $^1\text{H}$  NMR, yield of **9aa** was determined by using  $\text{CH}_2\text{Br}_2$  as internal standard.

| Entry | $\text{Cs}_2\text{CO}_3$ (equiv.) | NMR Yield ( <b>9aa</b> ) <sup>a</sup> |
|-------|-----------------------------------|---------------------------------------|
| 1     | 1.5                               | 30%                                   |
| 2     | 2.0                               | 65% (58%) <sup>b</sup>                |
| 3     | 2.5                               | 35%                                   |

<sup>[a]</sup>Crude yield

## 4.0 General procedure for Visible Light-Induced Arylation (Alkylation)

### 4.1 General procedure for light-induced synthesis of diarylmethanes (**3**)

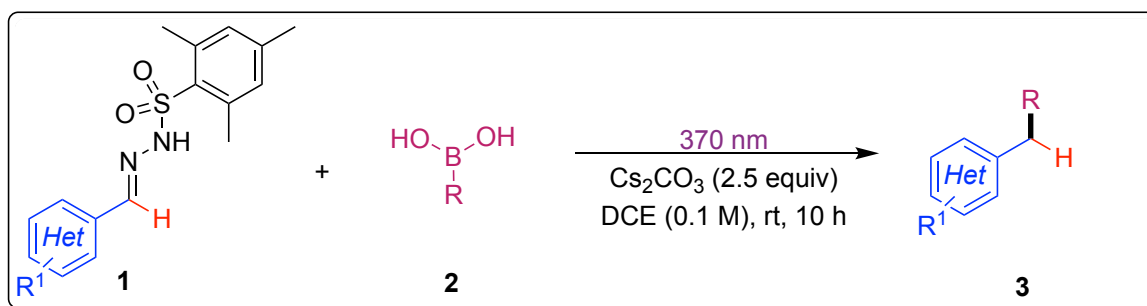

**General procedure A:** To an oven dried 5 mL glass vial was charged with magnetic stir bar, *N*-mesitylene-sulfonylhydrazone **1** (0.1 mmol, 1.0 equiv) derived from aldehyde was added, then  $\text{Cs}_2\text{CO}_3$  (0.25 mmol, 2.5 equiv) and aryl/alkylboronic acid **2** (0.15 mmol, 1.5 equiv) were added followed by DCE solvent (0.1 M, 1mL) under nitrogen atmosphere. The reaction mixture was stirred in presence of 370 nm LEDs at room temperature using fan (we control the temperature by using the fan the temperature of the reaction reaching  $\sim 35^\circ\text{C}$ ) for 10 h. Upon the complete consumption of the starting materials, the reaction mixture was diluted with ethyl acetate and then passed through the celite pad the solvents were removed under reduced pressure and residue submitted for  $^1\text{H}$  NMR, yield of **3aa** was determined by using  $\text{CH}_2\text{Br}_2$  as an internal standard.

## Spectral data of Isolated compounds:

### 1-Benzyl-4-methoxybenzene (**3aa**)

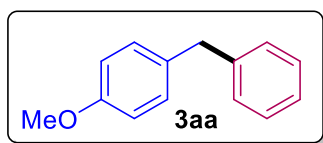

**3aa** was prepared according to the general procedure **A** in 90% (35.0 mg) colorless oil. Purification done by column chromatography on silica gel using (hexane: EtOAc = 20:1) as an eluent, **TLC** (1% ethyl acetate in hexane);  $R_f = 0.45$ ;  $^1\text{H NMR}$  (500 MHz,  $\text{CDCl}_3$ ):  $\delta$  7.35 - 7.33 (m, 2H), 7.26 - 7.24 (m, 3H), 7.19 (d,  $J = 7.1$  Hz, 2H), 6.92 (d,  $J = 7.1$  Hz, 2H), 4.00 (s, 2H), 3.86 (s, 3H);  $^{13}\text{C NMR}$  (126 MHz,  $\text{CDCl}_3$ ):  $\delta$  158.1, 141.7, 133.4, 130.0, 128.9, 128.6, 126.1, 114.0, 55.4, 41.0.

Spectral data matched with the reported literature.<sup>[2]</sup>

### 4-Benzyl-*N,N*-dimethylaniline (**3ba**)

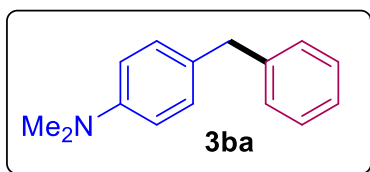

**3ba** was prepared according to the general procedure **A** in 76% (32.0 mg) yellow oil. Purification done by column chromatography on silica gel using (hexane: EtOAc = 98:2) as an eluent, **TLC** (10% ethyl acetate in hexane);  $R_f = 0.4$ ;  $^1\text{H NMR}$  (500 MHz,  $\text{CDCl}_3$ ):  $\delta$  7.28 (t,  $J = 7.4$  Hz, 2H), 7.19 (d,  $J = 8.0$  Hz, 3H), 7.08 (d,  $J = 8.5$  Hz, 2H), 6.71 (d,  $J = 8.2$  Hz, 2H), 3.90 (s, 2H), 2.91 (s, 6H);  $^{13}\text{C NMR}$  (126 MHz,  $\text{CDCl}_3$ ):  $\delta$  149.2, 142.1, 129.6, 128.9, 128.4, 126.9, 125.9, 113.1, 41.05, 41.01.

Spectral data matched with the reported literature.<sup>[2]</sup>

### Diphenylmethane (**3ca**)

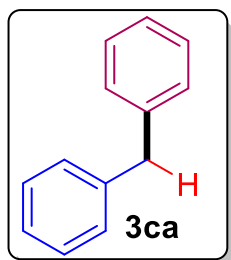

**3ca** was prepared according to the general procedure **A** in 73% (31.0 mg) Colorless oil. Purification done by column chromatography on silica gel using (hexanes) as the eluent, **TLC** (hexanes):  $R_f = 0.6$ ;  $^1\text{H NMR}$  (500 MHz,  $\text{CDCl}_3$ ):  $\delta$  7.40-7.29 (m, 5H), 7.25-7.19 (m, 5H), 4.01 (s, 2H);  $^{13}\text{C NMR}$  (126 MHz,  $\text{CDCl}_3$ ):  $\delta$  141.2, 129.0, 128.5, 126.1, 42.0

Spectral data matched with the reported literature.<sup>[4]</sup>

### 4-Benzylphenol (**3da**)

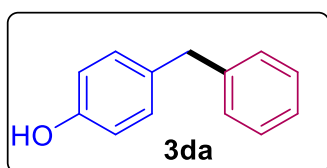

**3da** was prepared according to the general procedure **A** in 42% (15.0 mg) colorless oil. Purification done by column chromatography on silica gel using (hexane: EtOAc = 95:5) as an eluent, **TLC** (10% ethyl acetate in hexane);  $R_f = 0.35$ .  $^1\text{H NMR}$  (500 MHz,  $\text{CDCl}_3$ ):  $\delta$  7.30-

7.27(m, 2H), 7.21-7.17 (m, 3H), 7.07 (d,  $J = 8.7$  Hz, 2H), 6.77 (d,  $J = 8.7$  Hz, 2H), 3.92 (s, 2H);  $^{13}\text{C}$  NMR (126 MHz,  $\text{CDCl}_3$ ):  $\delta$  153.8, 141.5, 133.5, 130.1, 128.8, 128.5, 126.0, 115.3, 41.1.

Spectral data matched with the reported literature.<sup>[5]</sup>

#### 1-Chloro-4-(4-methoxybenzyl) benzene (**3eg**)

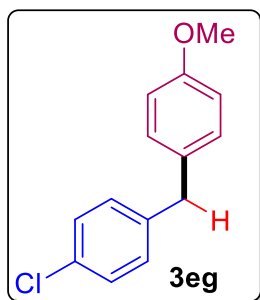

**3eg** was prepared according to the general procedure **A** in 75% (35.0 mg) Colorless oil. Purification done by column chromatography on silica gel using (hexanes: EtOAc = 98:2) as the eluent, **TLC** (5% ethyl acetate in hexanes):  $R_f = 0.28$ ;  $^1\text{H}$  NMR (500 MHz,  $\text{CDCl}_3$ ):  $\delta$  7.25-7.22(m, 2H), 7.13-7.10 (m, 4H), 6.86- 6.80 (m, 2H), 3.88 (s, 2H), 3.77 (s, 3H);  $^{13}\text{C}$  NMR (126 MHz,  $\text{CDCl}_3$ ):  $\delta$  158.2, 140.1, 132.7, 131.8, 130.2, 129.9, 128.6, 114.0, 55.3, 40.6.

Spectral data matched with the reported literature.<sup>[3]</sup>

#### 2-Benzyl naphthalene (**3fa**)

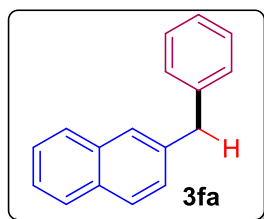

**3fa** was prepared according to the general procedure **A** in 78% (72.0 mg) white solid. Purification done by column chromatography on silica gel using (hexanes: EtOAc = 99:1) as the eluent, **TLC** (5% ethyl acetate in hexanes):  $R_f = 0.45$ ;  $^1\text{H}$  NMR (500 MHz,  $\text{CDCl}_3$ ):  $\delta$  7.83-7.77 (m, 3H), 7.66 (s, 1H), 7.50-7.42 (m, 2H), 7.36-7.30 (m, 3H), 7.27-7.20 (m, 3H), 4.17 (s, 2H);  $^{13}\text{C}$  NMR (126 MHz,  $\text{CDCl}_3$ ):  $\delta$  141.0, 138.7, 133.7, 132.1, 129.1, 128.6, 128.1, 127.75, 127.73, 127.6, 127.2, 126.2, 126.0, 125.4, 42.2.1.

Spectral data matched with the reported literature.<sup>[6]</sup>

#### 3-(4-Methoxybenzyl)pyridine (**3gg**)

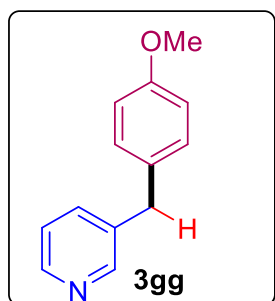

**3gg** was prepared according to the general procedure **A** in 42% (17.0 mg) Colorless oil. Purification done by column chromatography on silica gel using (hexanes: EtOAc = 97:3) as the eluent, **TLC** (10% ethyl acetate in hexanes):  $R_f = 0.25$ ;  $^1\text{H}$  NMR (500 MHz,  $\text{CDCl}_3$ ):  $\delta$  7.25-7.23 (m, 2H), 7.12-7.06 (m, 4H), 6.85-6.81 (m, 2H), 3.89 (s, 2H), 3.79 (s, 3H);  $^{13}\text{C}$  NMR (126 MHz,  $\text{CDCl}_3$ ):  $\delta$  158.1, 140.1, 132.7, 131.8, 130.2, 129.9, 128.6, 114.0, 55.3, 40.4. Spectral data matched with the reported literature.<sup>[7]</sup>

#### 4-Benzylphenyl 2-(4-isobutylphenyl)propanoate (**3ha**)

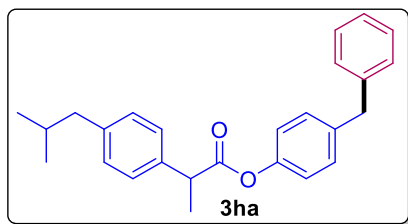

**3ha** was prepared according to the general procedure **A** in 90% (33.0 mg) colorless oil. Purification done by column chromatography on silica gel using (hexanes: EtOAc= 99:1) as the eluent, **TLC** (10% ethyl acetate in hexanes):  $R_f = 0.55$ ;  $^1\text{H}$  **NMR** (500 MHz,  $\text{CDCl}_3$ ): 7.32-7.26 (m, 4H), 7.23-7.15 (m, 7H), 6.93 (d,  $J = 8.8$  Hz, 2H), 3.97 (s, 2H), 3.96-3.92 (m, 1H), 2.40 (d,  $J = 7.1$  Hz, 2H), 1.93-1.84 (m, 1H), 1.60 (d,  $J = 8.0$  Hz, 3H), 0.9 (d,  $J = 7.5$  Hz, 6H);  $^{13}\text{C}$  **NMR** (126 MHz,  $\text{CDCl}_3$ ):  $\delta$  173.4, 149.2, 140.9, 140.8, 138.6, 137.4, 129.8, 129.6, 129.0, 128.6, 127.3, 126.2, 45.3, 45.1, 41.3, 30.2, 22.5, 18.6. **HRMS** (ESI/Q-TOF)  $m/z$ :  $[\text{M}+\text{H}]^+$  Calcd for  $\text{C}_{26}\text{H}_{29}\text{O}_2$  373.2162., Found 373.2164.

#### 1-Methoxy-4-(4-(trifluoromethyl)benzyl) benzene (**3ab**)

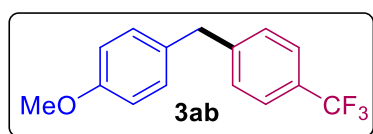

**3ab** was prepared according to the general procedure **A** in 72% (38.0 mg) white solid. Purification done by column chromatography on silica gel using (hexane: EtOAc = 98:2) as an eluent, **TLC** (10% ethyl acetate in hexane);  $R_f = 0.52$ .  $^1\text{H}$  **NMR** (500 MHz,  $\text{CDCl}_3$ ):  $\delta$  7.55 (d,  $J = 8.1$  Hz, 2H), 7.30 (d,  $J = 8.1$  Hz, 2H), 7.10 (d,  $J = 8.5$  Hz, 2H), 6.87 (d,  $J = 8.5$  Hz, 2H), 3.98 (s, 2H), 3.80 (s, 3H);  $^{13}\text{C}$  **NMR** (126 MHz,  $\text{CDCl}_3$ ):  $\delta$  158.3, 145.8, 132.2, 130.4, 129.1, 125.5(q, 15.5 Hz), 123.3, 114.1, 55.3, 40.9;  $^{19}\text{F}$  **NMR** (471 MHz,  $\text{CDCl}_3$ ):  $\delta$  -62.2.

Spectral data matched with the reported literature.<sup>[6]</sup>

#### Methyl 4-(4-methoxybenzyl) benzoate (**3ac**)

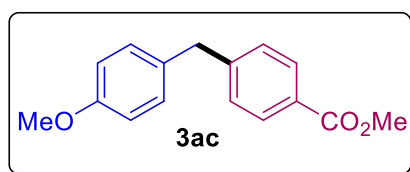

**3ac** was prepared according to the general procedure **A** in 71% (36.0 mg) colorless oil. Purification done by column chromatography on silica gel using (hexane: EtOAc = 97:3) as an eluent, **TLC** (10% ethyl acetate in hexane);  $R_f = 0.40$ .

$^1\text{H}$  **NMR** (500 MHz,  $\text{CDCl}_3$ ):  $\delta$  7.96 (d,  $J = 8.5$  Hz, 2H), 7.25 (d,  $J = 8.5$  Hz, 2H), 7.10 (d,  $J = 8.7$  Hz, 2H), 6.85 (d,  $J = 8.7$  Hz, 2H), 3.97(s, 2H), 3.90 (s, 3H), 3.79 (s, 3H);  $^{13}\text{C}$  **NMR** (126 MHz,  $\text{CDCl}_3$ ):  $\delta$  167.7, 158.2, 147.1, 132.3, 130.4, 129.9, 128.9, 128.1, 114.1, 58.3, 52.1, 41.1 **HRMS** (ESI/Q-TOF)  $m/z$ :  $[\text{M}+\text{H}]^+$  Calcd for  $\text{C}_{16}\text{H}_{17}\text{O}_3$  257.1172, Found 257.1175.

Spectral data matched with the reported literature.<sup>[7]</sup>

#### 4-(4-Methoxybenzyl)-1,1'-biphenyl (**3ad**)

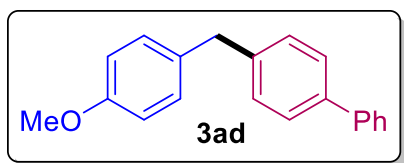

**3ad** was prepared according to the general procedure **A** in 72% (37.0 mg) colorless oil. Purification done by column chromatography on silica gel using (hexanes: EtOAc = 99:1) as an eluent, **TLC** (10% ethyl acetate in hexanes):  $R_f = 0.60$ .  $^1\text{H}$  NMR (500 MHz,  $\text{CDCl}_3$ ):  $\delta$  7.59-7.57 (m, 2H), 7.53 (d,  $J = 8.0$  Hz, 2H), 7.44 (td,  $J = 8.5$  Hz, 1H, 2H), 7.34 (tt,  $J = 7.5$  Hz, 1H, 1H), 7.27 (dt,  $J = 8.0$  Hz, 2H), 7.16 (d,  $J = 9.0$  Hz, 2H), 6.87 (d,  $J = 8.5$  Hz, 2H), 3.98 (s, 2H), 3.80 (s, 3H);  $^{13}\text{C}$  NMR (126 MHz,  $\text{CDCl}_3$ ):  $\delta$  158.1, 141.4, 140.8, 139.0, 133.2, 130.2, 129.3, 128.8, 127.3, 127.2, 127.1, 114.0, 55.3, 40.7.

Spectral data matched with the reported literature.<sup>[7]</sup>

#### (4-Methoxybenzyl) benzaldehyde (**3ae**)

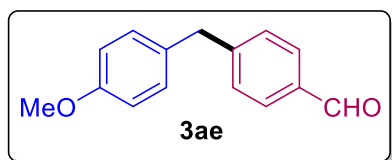

**3ae** was prepared according to the general procedure **A** in 45% (20.0 mg) colorless oil. Purification done by column chromatography on silica gel using (hexane: EtOAc = 98:2) as an eluent, **TLC** (10% ethyl acetate in hexane);  $R_f = 0.30$ .  $^1\text{H}$  NMR (500 MHz,  $\text{CDCl}_3$ ):  $\delta$  9.97 (s, 1H), 7.79 (d,  $J = 8.3$  Hz, 2H), 7.33 (d,  $J = 8.0$  Hz, 2H), 7.09 (d,  $J = 8.0$  Hz, 2H), 6.84 (d,  $J = 8.3$  Hz, 2H), 4.00 (s, 2H), 3.79 (s, 3H);  $^{13}\text{C}$  NMR (126 MHz,  $\text{CDCl}_3$ ):  $\delta$  192.1, 158.3, 149.1, 134.7, 131.9, 130.1, 130.0, 129.5, 114.2, 55.4, 41.3; **HRMS** (ESI/Q-TOF)  $m/z$ :  $[\text{M}+\text{H}]^+$  Calcd for  $\text{C}_{15}\text{H}_{15}\text{O}_2$  227.1056, Found 227.1056.

Spectral data matched with the reported literature.<sup>[7]</sup>

#### 4-(4-Methoxybenzyl) benzonitrile (**3af**)

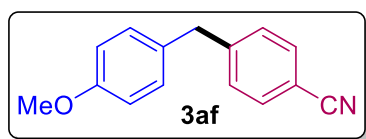

**3af** was prepared according to the general procedure **A** in 58% (25.8 mg) colorless oil. Purification done by column chromatography on silica gel using (hexane: EtOAc = 97:3) as an eluent, **TLC** (10% ethyl acetate in hexane);  $R_f = 0.42$ ;  $^1\text{H}$  NMR (500 MHz,  $\text{CDCl}_3$ ):  $\delta$  7.57 (d,  $J = 8.4$  Hz, 2H), 7.27 (d,  $J = 7.8$  Hz, 2H), 7.06 (d,  $J = 7.8$  Hz, 2H), 6.86 (d,  $J = 8.4$  Hz, 2H), 3.97 (s, 2H), 3.79 (s, 3H);  $^{13}\text{C}$  NMR (126 MHz,  $\text{CDCl}_3$ ):  $\delta$  158.4, 147.4, 132.4, 131.6, 130.1, 129.7, 119.2, 114.3, 110.1, 55.4, 41.2.

Spectral data matched with the reported literature.<sup>[7]</sup>

### Bis(4-Methoxyphenyl) methane (**3ag**)

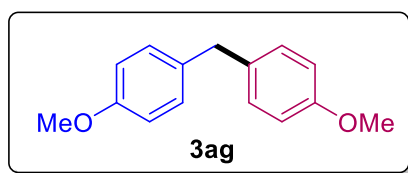

**3ag** was prepared according to the general procedure **A** in 79% (36.0 mg) colorless oil. Purification done by column chromatography on silica gel using (hexane: EtOAc = 98:2) as an eluent, **TLC** (10% ethyl acetate in hexane); **R<sub>f</sub>** = **0.53**.

**<sup>1</sup>H NMR** (500 MHz, CDCl<sub>3</sub>): δ 7.11 (d, *J* = 8.5 Hz, 4H), 6.84 (d, *J* = 8.5 Hz, 4H), 3.88 (s, 2H), 3.79 (s, 6H); **<sup>13</sup>C NMR** (126 MHz, CDCl<sub>3</sub>): δ 158.0, 133.8, 129.8, 113.9, 55.3, 40.2; **HRMS** (ESI/Q-TOF) *m/z*: [M+NH<sub>4</sub>]<sup>+</sup> Calcd for C<sub>14</sub>H<sub>19</sub>NO<sub>2</sub> 245.1410, Found 246.1489.

Spectral data matched with the reported literature.<sup>[9]</sup>

### 1-Chloro-3-(4-methoxybenzyl) benzene (**3ah**)

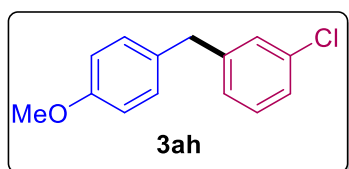

**3ah** was prepared according to the general procedure **A** in 92% (42.8 mg) colorless oil. Purification done by column chromatography on silica gel using (hexane: EtOAc = 97:3) as an eluent, **TLC** (10% ethyl acetate in hexane); **R<sub>f</sub>** = **0.45**.

**<sup>1</sup>H NMR** (500 MHz, CDCl<sub>3</sub>): δ 7.21 (dd, *J* = 7.0 Hz, 1.50 Hz, 3H), 7.11 (d, *J* = 9.0 Hz, 2H), 7.09-7.07 (m, 1H), 6.86 (d, *J* = 8.1 Hz, 2H), 3.90 (s, 2H), 3.80 (s, 3H); **<sup>13</sup>C NMR** (126 MHz, CDCl<sub>3</sub>): δ 158.6, 139.2, 134.6, 132.7, 130.3, 130.1, 129.3, 127.4, 126.6, 114.4, 55.7, 41.1.

Spectral data matched with the reported literature.<sup>[10]</sup>

### 2-(4-Methoxybenzyl)-1,3-dimethylbenzene(**3ai**)

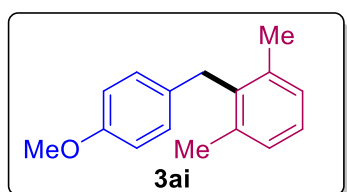

**3ai** was prepared according to the general procedure **A** in 55% (25.0 mg) colorless oil. Purification done by column chromatography on silica gel using (hexane: EtOAc = 99:1) as an eluent, **TLC** (10% ethyl acetate in hexane); **R<sub>f</sub>** = **0.45**; **<sup>1</sup>H NMR** (500 MHz, CDCl<sub>3</sub>): δ 7.09-7.05 (m, 3H), 6.93 (d, *J* = 8.8 Hz, 2H), 6.79 (d, *J* = 8.8 Hz, 2H), 3.99 (s,

2H), 3.76 (s, 3H), 2.24 (s, 6H); **<sup>13</sup>C NMR** (126 MHz, CDCl<sub>3</sub>): δ 157.7, 137.3, 137.1, 131.7, 128.8, 128.1, 126.3, 113.8, 55.31, 34.18, 20.27; **HRMS** (ESI/Q-TOF) *m/z*: [M+H]<sup>+</sup> Calcd for C<sub>16</sub>H<sub>19</sub>O 227.1430, Found 227.1421.

Spectral data matched with the reported literature.<sup>[6]</sup>

#### 1,4-Dimethoxy-2-(4-methoxybenzyl) benzene (**3aj**)

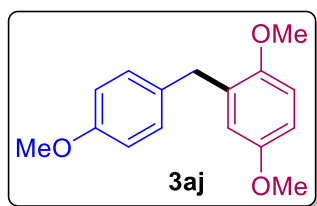

**3aj** was prepared according to the general procedure **A** in 52% (26.0 mg) white solid. Purification done by column chromatography on silica gel using (hexane: EtOAc = 96:4) as an eluent, **TLC** (10% ethyl acetate in hexane);  $R_f = 0.33$ ;  $^1\text{H NMR}$  (500 MHz,  $\text{CDCl}_3$ ):  $\delta$  8.02-8.00 (m, 1H), 7.87-7.85 (m, 1H), 7.77 (d,  $J = 8.1$  Hz, 1H), 7.47-7.40 (m, 3H), 7.29 (dd,  $J = 7$  Hz, 1H, 1H), 7.13 (d,  $J = 8.75$  Hz, 2H), 6.83 (d,  $J = 8.70$  Hz, 2H) 4.40 (s, 2H), 3.77 (s, 3H);  $^{13}\text{C NMR}$  (126 MHz,  $\text{CDCl}_3$ ):  $\delta$  158.4, 137.1, 134.0, 132.8, 132.2, 129.8, 128.8, 127.3, 127.2, 126.0, 125.8, 125.6, 124.4, 114.0, 55.4, 38.3.

Spectral data matched with the reported literature.<sup>[11]</sup>

#### 2,4-Difluoro-1-(4-methoxybenzyl) benzene (**3ak**)

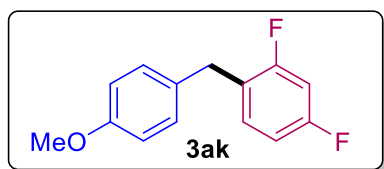

**3ak** was prepared according to the general procedure **A** in 47% (22.0 mg) colorless oil. Purification done by column chromatography on silica gel using (hexane: EtOAc = 97:3) as an eluent, **TLC** (10% ethyl acetate in hexane);  $R_f = 0.32$ ;  $^1\text{H NMR}$  (500 MHz,  $\text{CDCl}_3$ ):  $\delta$  7.12 (d,  $J = 8.3$  Hz, 2H), 7.08-7.06 (m, 1H), 6.84 (d,  $J = 8.8$  Hz, 2H), 6.80-6.77 (m, 2H), 3.89 (s, 2H), 3.78 (s, 3H);  $^{13}\text{C NMR}$  (126 MHz,  $\text{CDCl}_3$ ):  $\delta$  158.2, 131.7, 131.4, 131.5, 129.9, 129.8, 114.1, 111.2, 111.1, 104, 55.4, 33.5;  $^{19}\text{F NMR}$  (471 MHz,  $\text{CDCl}_3$ ):  $\delta$  -113.3, -113.7; **HRMS** (ESI/Q-TOF)  $m/z$ :  $[\text{M}+\text{H}]^+$  Calcd for  $\text{C}_{14}\text{H}_{13}\text{F}_2\text{O}$  235.0929, Found 235.0987.

#### 2-Fluoro-1-methoxy-3-(4-methoxybenzyl) benzene (**3al**)

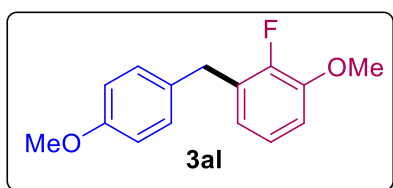

**3al** was prepared according to the general procedure **A** in 49% (24.0 mg) colorless oil. Purification done by column chromatography on silica gel using (hexane: EtOAc = 95:5) as an eluent, **TLC** (10% ethyl acetate in hexane);  $R_f = 0.31$ ;  $^1\text{H NMR}$  (500 MHz,  $\text{CDCl}_3$ ):  $\delta$  8.01 (d,  $J = 2.5$  Hz, 1H), 7.36 (dd,  $J = 8.5$  Hz, 2.5 Hz, 1H), 7.08 (d,  $J = 8.7$  Hz, 2H), 6.84 (d,  $J = 8.7$  Hz, 2H), 6.67 (d,  $J = 8.4$  Hz, 1H), 3.91 (s, 2H), 3.83 (s, 3H), 3.78 (s, 3H);  $^{13}\text{C NMR}$  (126 MHz,  $\text{CDCl}_3$ ):  $\delta$  162.8, 158.2, 146.2, 139.5, 132.7, 129.8, 129.7, 114.1, 114.0, 110.8, 55.4, 53.5, 37.3;  $^{19}\text{F NMR}$  (471 MHz,  $\text{CDCl}_3$ ):  $\delta$  -132.6; **HRMS** (ESI/Q-TOF)  $m/z$ :  $[\text{M}]^+$  Calcd for  $\text{C}_{15}\text{H}_{15}\text{FO}_2$  246.1056, Found 246.1030.

### 1-Chloro-2-(4-methoxybenzyl) benzene (**3am**)

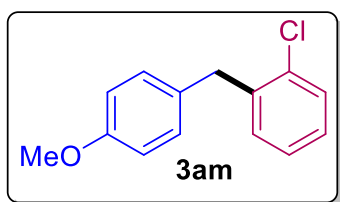

**3am** was prepared according to the general procedure **A** in 90% (40.0 mg) colorless oil. Purification done by column chromatography on silica gel using (hexane: EtOAc = 97:3) as an eluent, **TLC** (10% ethyl acetate in hexane);  $R_f = 0.45$ ;  $^1\text{H NMR}$  (500 MHz,  $\text{CDCl}_3$ ):  $\delta$  7.40-7.35 (m, 1H), 7.18-7.10 (m, 5H), 6.85 (dt,  $J = 9.1$  Hz, 2.3 Hz, 2H), 4.04 (s, 2H), 3.79 (s, 3H);  $^{13}\text{C NMR}$  (126 MHz,  $\text{CDCl}_3$ ):  $\delta$  139.6, 138.8, 134.5, 131.1, 129.1, 128.8, 127.5, 127.3, 126.9, 126.3, 39.2.

Spectral data matched with the reported literature.<sup>[13]</sup>

### 1-Isopropyl-2-(4-methoxybenzyl) benzene (**3an**)

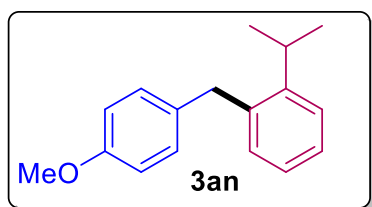

**3an** was prepared according to the general procedure **A** in 83% (40.0 mg) colorless oil. Purification done by column chromatography on silica gel using (hexane: EtOAc = 99:1) as an eluent, **TLC** (10% ethyl acetate in hexane);  $R_f = 0.35$ .  $^1\text{H NMR}$  (500 MHz,  $\text{CDCl}_3$ ):  $\delta$  7.32 (d,  $J = 7.8$  Hz, 1H), 7.27 (t,  $J = 5.0$  Hz, 1H), 7.16 (t,  $J = 7.2$  Hz, 1H), 7.12 (d,  $J = 7.5$  Hz, 1H), 7.05 (d,  $J = 8.2$  Hz, 2H), 6.84 (d,  $J = 8.7$  Hz, 2H), 4.02 (s, 2H), 3.79 (s, 3H), 3.18 (sept,  $J = 7.9$  Hz, 1H), 1.17 (d,  $J = 7.9$  Hz, 1H);  $^{13}\text{C NMR}$  (126 MHz,  $\text{CDCl}_3$ ):  $\delta$  158.2, 147.6, 138.1, 133.7, 130.9, 130.8, 129.9, 127.2, 125.9, 125.1, 114.2, 55.6, 38.3, 29.3, 24.2; **HRMS** (ESI/Q-TOF)  $m/z$ :  $[\text{M}+\text{K}]^+$  Calcd for  $\text{C}_{17}\text{H}_{20}\text{KO}$  279.1146, Found 279.1179.

Spectral data matched with the reported literature.<sup>[9]</sup>

### 2-(4-Methoxy-benzyl) naphthalene (**3ao**)

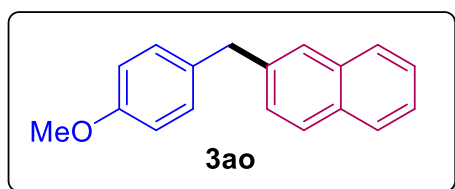

**3ao** was prepared according to the general procedure **A** in 82% (40.6 mg) colorless oil. Purification done by column chromatography on silica gel using (hexane: EtOAc = 99:1) as an eluent, **TLC** (10% ethyl acetate in hexane);  $R_f = 0.52$ ;  $^1\text{H NMR}$  (500 MHz,  $\text{CDCl}_3$ ):  $\delta$  8.02-8.00 (m, 1H), 7.87-7.85 (m, 1H), 7.77 (d,  $J = 8.1$  Hz, 1H), 7.47-7.40 (m, 3H), 7.29 (dd,  $J = 7.0$  Hz, 1H), 7.13 (d,  $J = 8.75$  Hz, 2H), 6.83 (d,  $J = 8.7$  Hz, 2H), 4.40 (s, 2H), 3.77 (s, 3H);  $^{13}\text{C NMR}$  (126 MHz,  $\text{CDCl}_3$ ):  $\delta$  158.4, 137.1, 134.0, 132.8, 132.2, 129.8, 128.8, 127.3, 127.2, 126.0, 125.8, 125.6, 124.4, 114.0, 55.4, 38.3; **HRMS** (ESI/Q-TOF)  $m/z$ :  $[\text{M}+\text{NH}_4]^+$  Calcd for  $\text{C}_{18}\text{H}_{20}\text{NO}$  266.1539, Found 266.1537.

Spectral data matched with the reported literature.<sup>[12]</sup>

#### 1-Isopropyl-2-(4-methoxybenzyl) benzene (**3bp**)

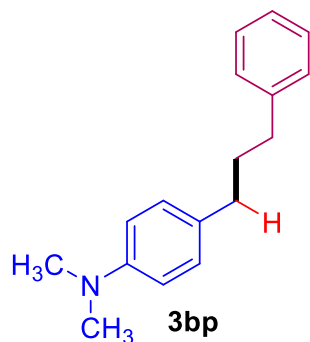

**3bp** was prepared according to the general procedure **A** in 72% (40.0 mg) colorless oil. Purification done by column chromatography on silica gel using (hexane: EtOAc= 97:3) as an eluent, TLC (10% ethyl acetate in hexane);  $R_f = 0.35$ .

$^1\text{H}$  NMR (500 MHz,  $\text{CDCl}_3$ ):  $\delta$  7.30-7.18 (m,  $J = 7.8$  Hz, 5H), 7.08 (d,  $J = 8.5$  Hz, 2H), 6.70 (d,  $J = 8.5$  Hz, 2H), 2.92 (s, 6H), 2.63 (t,  $J = 7.7$  Hz, 2H), 2.57 (t,  $J = 7.7$  Hz, 2H), 1.96-1.90 (m, 2H);  $^{13}\text{C}$  NMR (126 MHz,

$\text{CDCl}_3$ ):  $\delta$  142.6, 129.10, 128.5, 128.3, 127.0, 125.7, 113.1, 41.0, 35.5, 34.4, 33.3.

Spectral data matched with the reported literature.<sup>[14]</sup>

## 4.2 Synthesis of diarylalkylmethanes (**5**)

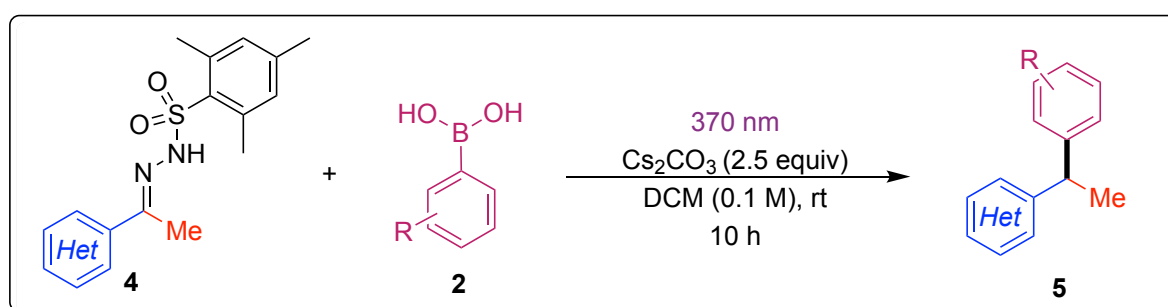

**General procedure B:** To an oven dried 5 mL glass vial was charged with magnetic stir bar, *N*-mesitylene-sulfonylhydrazone **4a** (0.1 mmol, 1.0 equiv) derived from aldehyde was added, then  $\text{Cs}_2\text{CO}_3$  (0.2 mmol, 2.5 equiv) and arylboronic acid **2a** (0.15 mmol, 1.5 equiv) were added followed by DCM solvent (0.1 M, 1mL) under nitrogen atmosphere. The reaction mixture was stirred in presence of 370 nm LEDs at room temperature using fan (we control the temperature by using the fan the temperature of the reaction reaching  $\sim 35^\circ\text{C}$ ) for 10 h. Upon the complete consumption of the starting materials, the reaction mixture was diluted with ethyl acetate and then passed through the celite pad the solvents were removed under reduced pressure and residue submitted for  $^1\text{H}$  NMR, yield of **5aa** was determined by using  $\text{CH}_2\text{Br}_2$  as internal standard.

#### Ethane-1,1-diyl dibenzene (**5aa**)

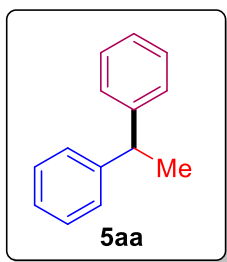

**5aa** was prepared according to the general procedure **B** in 63% (23.0 mg) Colorless oil. Purification done by column chromatography on silica gel using (hexanes: EtOAc = 99:1) as the eluent, **TLC** (hexanes):  $R_f = 0.45$ ;  $^1\text{H NMR}$  (500 MHz,  $\text{CDCl}_3$ ):  $\delta$  7.31-7.26 (m, 6H), 7.25-7.17 (m, 4H), 4.19 (q,  $J = 7.2$  Hz, 1H), 1.66 (d,  $J = 7.2$  Hz, 3H);  $^{13}\text{C NMR}$  (126 MHz,  $\text{CDCl}_3$ ):  $\delta$  146.5, 128.4, 127.7, 126.1, 44.9, 22.0.

Spectral data matched with the reported literature.<sup>[15]</sup>

#### (R)-1-Methoxy-4-(1-(4-(trifluoromethyl)phenyl)ethyl)benzene (**5bb**)

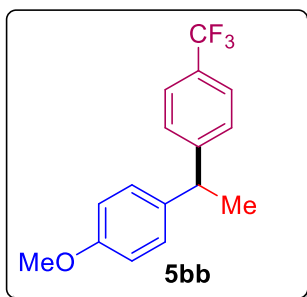

**5bb** was prepared according to the general procedure **B** in 48% (27.0 mg) Colorless oil. Purification done by column chromatography on silica gel using (hexanes: EtOAc = 98:2) as the eluent, **TLC** (10% ethyl acetate in hexanes):  $R_f = 0.45$ ;  $^1\text{H NMR}$  (500 MHz,  $\text{CDCl}_3$ ):  $\delta$  7.53 (d,  $J = 8$  Hz, 2H), 7.32 (d,  $J = 8$  Hz, 2H), 7.13 (d,  $J = 8.2$  Hz, 2H), 6.85 (d,  $J = 8.2$  Hz, 2H), 4.17 (q,  $J = 7.1$  Hz, 1H), 3.78 (s, 3H), 1.63 (d,  $J = 7.1$  Hz, 3H);  $^{13}\text{C NMR}$  (126 MHz,  $\text{CDCl}_3$ ):  $\delta$  158.2, 141.7, 133.4, 130.0, 128.9, 128.6, 126.1, 114.0, 55.4, 41.1;  $^{19}\text{F NMR}$  (471 MHz,  $\text{CDCl}_3$ ):  $\delta$  -62.09.

Spectral data matched with the reported literature.<sup>[8]</sup>

#### Methyl (R)-4-(1-(4-methoxyphenyl) ethyl) benzoate (**5bc**)

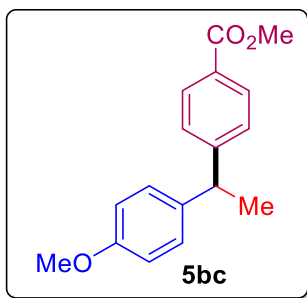

**5bc** was prepared according to the general procedure **B** in 71% (38.0 mg) Colorless oil. Purification done by column chromatography on silica gel using (hexanes: EtOAc = 98:2) as the eluent, **TLC** (10% ethyl acetate in hexanes):  $R_f = 0.35$ ;  $^1\text{H NMR}$  (500 MHz,  $\text{CDCl}_3$ ):  $\delta$  7.95 (d,  $J = 8.4$  Hz, 2H), 7.28 (d,  $J = 8.4$  Hz, 2H), 7.12 (d,  $J = 8.6$  Hz, 2H), 6.84 (d,  $J = 8.6$  Hz, 2H), 4.16 (q,  $J = 7.2$  Hz, 1H), 3.78 (s, 3H), 1.63 (d,  $J = 7.2$  Hz, 3H);  $^{13}\text{C NMR}$  (126 MHz,  $\text{CDCl}_3$ ):  $\delta$  167.2, 158.1, 152.3, 137.7, 129.8, 128.6, 127.7, 113.9, 55.3, 52.1, 44.1, 21.9.

Spectral data matched with the reported literature.<sup>[8]</sup>

#### 4,4'-(Ethane-1,1-diyl) bis(methoxybenzene) (**5bg**)

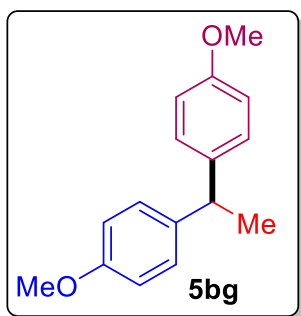

**5bg** was prepared according to the general procedure **B** in 72% (35.0 mg) white solid. Purification done by column chromatography on silica gel using (hexanes: EtOAc = 70:30) as the eluent, **TLC** (10% ethyl acetate in hexanes):  $R_f = 0.32$ .

$^1\text{H NMR}$  (500 MHz,  $\text{CDCl}_3$ ): 7.61 (d,  $J = 7.6$  Hz, 2H), 7.55 (d,  $J = 7.6$  Hz, 2H), 7.46 (t,  $J = 7.5$  Hz, 2H), 7.37-7.31 (m, 3H), 7.22 (d,  $J = 7.2$  Hz, 2H), 6.89 (d,  $J = 6.89$  Hz, 2H), 4.19 (q,  $J = 7.2$  Hz, 1H), 3.81 (s, 3H), 1.68 (d,  $J = 7.2$  Hz, 3H);  $^{13}\text{C NMR}$  (126 MHz,  $\text{CDCl}_3$ ):  $\delta$  158.0, 146.0, 141.0, 138.9, 138.5, 128.8, 128.6, 128.0, 127.7, 127.2, 127.1, 113.9, 43.3, 22.2.

Spectral data matched with the reported literature.<sup>[8]</sup>

#### (S)-4-(1-(4-Methoxyphenyl) ethyl)-1,1'-biphenyl (**5bd**)

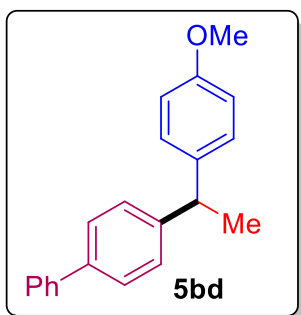

**5bd** was prepared according to the general procedure **B** in 55% (30.0 mg) white solid. Purification done by column chromatography on silica gel using (hexanes: EtOAc = 70:30) as the eluent, **TLC** (10% ethyl acetate in hexanes):  $R_f = 0.32$ .

$^1\text{H NMR}$  (500 MHz,  $\text{CDCl}_3$ ): 7.60 (d,  $J = 7.60$  Hz, 2H), 7.56 (d,  $J = 7.6$  Hz, 2H), 7.46 (t,  $J = 7.5$  Hz, 2H), 7.37-7.31 (m, 3H), 7.22 (d,  $J = 7.2$  Hz, 2H), 6.89 (d,  $J = 6.89$  Hz, 2H), 4.19 (q,  $J = 7.2$  Hz, 1H), 3.81 (s, 3H), 1.68 (d,  $J = 7.2$  Hz, 3H);  $^{13}\text{C NMR}$  (126 MHz,  $\text{CDCl}_3$ ):  $\delta$  158.0, 146.0, 141.0, 138.9, 138.5, 128.8, 128.6, 128.0, 127.7, 127.2, 127.1, 113.9, 43.3, 22.2; **HRMS** (ESI/Q-TOF)  $m/z$ :  $[\text{M}+\text{H}]^+$  Calcd for  $\text{C}_{21}\text{H}_{21}\text{O}$  289.1611, Found 289.1611.

Spectral data matched with the reported literature.<sup>[8]</sup>

#### (R)-3-(1-Phenylethyl)-1H-indole (**5ca**)

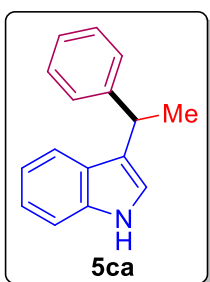

**5ca** was prepared according to the general procedure **B** in 82% (36.0 mg) yellow oil. Purification done by column chromatography on silica gel using (hexanes: EtOAc = 93:7) as the eluent, **TLC** (10% ethyl acetate in hexanes):  $R_f = 0.3$ ;  $^1\text{H NMR}$  (500 MHz,  $\text{CDCl}_3$ ):  $\delta$  7.96 (s, 1H), 7.37-7.32 (m, 2H), 7.30-7.26 (m, 2H), 7.20-7.13 (m, 2H), 7.02-6.98 (m, 2H), 4.38 (q,  $J = 7.38$  Hz, 1H), 1.71 (d,  $J = 7.1$  Hz, 3H);  $^{13}\text{C NMR}$  (126 MHz,  $\text{CDCl}_3$ ):  $\delta$  146.8, 136.7, 128.3, 127.5, 126.9, 125.9,

122.0, 121.5, 121.1, 119.7, 119.2, 37.0, 22.4; **HRMS** (ESI/Q-TOF)  $m/z$ :  $[M+H]^+$  Calcd for  $C_{16}H_{16}N$  222.1277., Found 222.1272.

Spectral data matched with the reported literature.<sup>[16]</sup>

### 4.3 Synthesis of bis(1,4-diaryl/naphthylmethyl)benzenes (**7**)

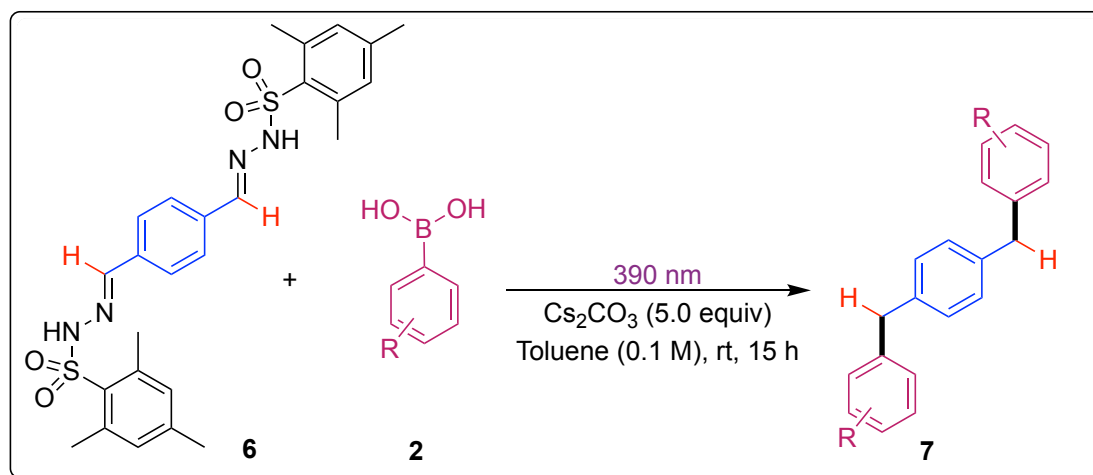

**General procedure C:** To an oven dried 5 mL glass vial was charged with magnetic stir bar, *N*-mesitylene-sulfonylhydrazone **6** (0.1 mmol, 1.0 equiv) was added, then  $Cs_2CO_3$  (0.2 mmol, 2.0 equiv) and arylboronic acid **2** (0.3 mmol, 3 equiv) were added followed by toluene solvent (0.1 M, 1mL) under nitrogen atmosphere. The reaction mixture was stirred in presence of 390 nm LEDs at room temperature using fan (we control the temperature by using the fan the temperature of the reaction reaching  $\sim 35^\circ C$ ) for 15 h. Upon the complete consumption of the starting materials, the reaction mixture was diluted with ethyl acetate and then passed through the celite pad the solvents were removed under reduced pressure and residue submitted for  $^1H$  NMR, yield of **7aa** was determined by using  $CH_2Br_2$  as internal standard.

#### 1,4-Dibenzylbenzene (**7aa**)

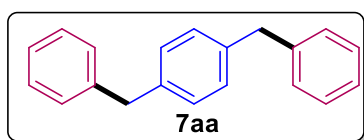

**7aa** was prepared according to the general procedure **C** in 70% (18 mg) yellow oil. Purification done by column chromatography on silica gel using (hexane: EtOAc = 99.5:0.5) as an eluent, **TLC** (5% ethyl acetate in hexane);  $R_f = 0.50$ ;  $^1H$  NMR (500 MHz,  $CDCl_3$ ):

7.36-7.29 (m, 5H), 7.23-7.20 (m, 5H), 7.13 (s, 4H), 3.97 (s, 4H);  $^{13}C$  NMR (126 MHz,  $CDCl_3$ ):  $\delta$  141.3, 138.9, 129.12, 129.04, 128.5, 126.1, 41.6.

Spectral data matched with the reported literature.<sup>[17]</sup>

#### 1,4-Bis(4-methoxybenzyl) benzene (**7ag**)

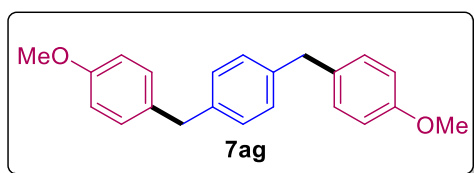

**7ag** was prepared according to the general procedure **C** in 68% (21.5 mg) yellow oil. Purification done by column chromatography on silica gel using (hexane: EtOAc = 98:2) as an eluent, **TLC** (10% ethyl acetate in hexane); **R<sub>f</sub>** = **0.35**; **<sup>1</sup>H NMR** (500 MHz, CDCl<sub>3</sub>): 7.11-7.09 (m, 8H), 6.82 (d, *J* = 7.1 Hz, 4H), 3.89 (s, 4H), 3.79 (s, 6H); **<sup>13</sup>C NMR** (126 MHz, CDCl<sub>3</sub>): δ 158.0, 139.3, 133.5, 129.9, 120.0, 114.0, 55.4, 40.8; **HRMS** (ESI/Q-TOF) *m/z*: [M+H]<sup>+</sup> Calcd for C<sub>22</sub>H<sub>23</sub>O<sub>2</sub> 319.1693, Found 319.1665.

#### 1,4-Bis(naphthalen-2-ylmethyl) benzene (**7an**)

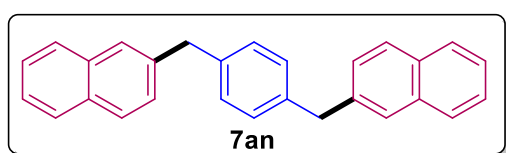

**7an** was prepared according to the general procedure **C** in 65% (17.0 mg) white solid. Purification done by column chromatography on silica gel using (hexane: EtOAc = 99.5:0.5) as an eluent, **TLC** (10% ethyl acetate in hexane); **R<sub>f</sub>** = **0.52**; **<sup>1</sup>H NMR** (500 MHz, CDCl<sub>3</sub>): 8.00-7.98(m, 2H), 7.86-7.84 ((m, 2H), 7.76 (d, *J* = 7.75 Hz, 2H), 7.46-7.39 (m, 6H), 7.29 (d, *J* = 7.3 Hz, 2H), 7.10 (s, 4H), 4.41 (s, 4H); **<sup>13</sup>C NMR** (126 MHz, CDCl<sub>3</sub>): δ 138.4, 136.8, 134.0, 132.0, 128.9, 128.7, 127.4, 127.2, 127.1, 125.6, 124.4, 38.7; **HRMS** (ESI/Q-TOF) *m/z*: [M+H]<sup>+</sup> Calcd for C<sub>28</sub>H<sub>26</sub>N 376.2060, Found 376.2029.

## 4.4 Synthesis of triarylmethanes (**9aa**)

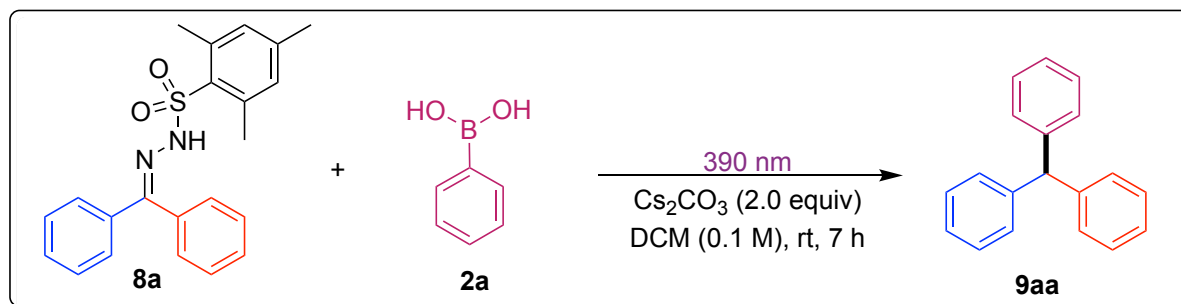

**General procedure D:** To an oven dried 5 mL glass vial was charged with magnetic stir bar, *N*-mesitylenesulphonylhydrazones **8a** (75.6 mg, 0.2 mmol, 1.0 equiv) derived from aldehyde was added, then Cs<sub>2</sub>CO<sub>3</sub> (130.3 mg, 0.4 mmol, 2.0 equiv) and arylboronic acid **2a** (36.5 mg, 0.3 mmol, 1.5 equiv) were added followed by DCM solvent (0.1 M, 2mL) under nitrogen atmosphere. The reaction mixture was stirred in presence of 390 nm LEDs at room temperature using fan (we control the temperature by using the fan the temperature of the reaction reaching

~35 °C) for 7 h. Upon the complete consumption of the starting materials, the reaction mixture was diluted with ethyl acetate and then passed through the celite pad the solvents were removed under reduced pressure and residue submitted for  $^1\text{H}$  NMR, yield of **9aa** was determined by using  $\text{CH}_2\text{Br}_2$  as internal standard.

#### Triphenylmethane (**9aa**)

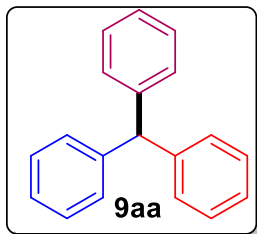

**9aa** was prepared according to the general procedure **D** in 58% (28 mg) white solid. Purification done by column chromatography on silica gel using (hexanes: DCM = 98:2) as the eluent, **TLC** (10% DCM in hexanes):  $R_f = 0.55$ ;  $^1\text{H}$  NMR (500 MHz,  $\text{CDCl}_3$ ):  $\delta$  7.31-7.27(m, 6H), 7.24-7.20 (m, 3H), 7.14-7.11(m, 6H), 5.56 (s, 1H);  $^{13}\text{C}$  NMR (126 MHz,  $\text{CDCl}_3$ ):  $\delta$  144.10, 129.6, 128.4, 126.4, 56.9; **HRMS** (ESI/Q-TOF)  $m/z$ :  $[\text{M}+\text{H}]^+$  Calcd for  $\text{C}_{19}\text{H}_{17}$  245.1341., Found 245.1341.

Spectral data matched with the reported literature.<sup>[18]</sup>

## 4.5 One-pot synthesis of diarylmethanes (**3**)

Procedure for the one-pot synthesis of diarylmethanes **3** from aldehydes and 2-mesitylenesulfonyl hydrazide.

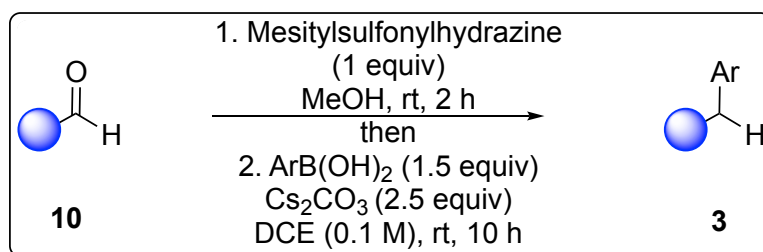

To a stirred solution of 2-mesitylenesulfonyl hydrazide (43.0 mg, 0.2 mmol, 1.0 equiv) in MeOH (0.5 M), corresponding aldehydes (0.2 mmol, 1.0 equiv) in MeOH (0.25 M) solution were added dropwise. The reaction mixture was stirred at room temperature for 2 h followed by removal of MeOH under pressure. In the crude reaction mixture,  $\text{Cs}_2\text{CO}_3$  (163.0 mg, 0.5 mmol, 2.5 equiv) and arylboronic acid (0.3 mmol, 1.5 equiv) were added followed by DCE solvent (0.1 M, 2 mL) under nitrogen atmosphere. The reaction mixture was stirred in presence of 370 nm LEDs at rt for 10 h. The reaction mixture was diluted with ethyl acetate and then passed through the celite pad. The organic solvent was removed under reduced pressure, and the crude obtained was separated by column chromatography on silica gel pad (1% EtOAc/hexanes) to afford the title product **3**.

Procedure for the gram scale synthesis of diarylmethanes **3aa** from *N*-sulfonyl-hydrazones **1a**

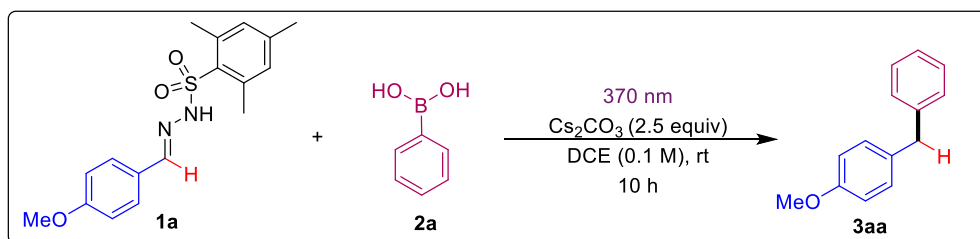

To an oven dried 25 mL round bottom flask charged with magnetic stir bar, *N*-mesitylene-sulfonylhydrazone **1a** (332.4 mg, 1 mmol, 1.0 equiv) derived from aldehyde were added, then Cs<sub>2</sub>CO<sub>3</sub> (814.5 mg, 2.5 mmol, 2.5 equiv) and arylboronic acid **2a** (182.8 mg, 1.5 mmol, 1.5 equiv) was added in DCE solvent (0.1 M) under nitrogen atmosphere. The reaction mixture was stirred in presence of 370 nm LEDs at rt for 10 h. Upon the complete consumption of the starting materials, the reaction mixture was diluted with ethyl acetate and then passed through the celite pad. The organic solvent was removed under reduced pressure, and the crude obtained was separated by column chromatography on silica gel pad (1% EtOAc/hexanes) to afford the title product **3aa** (168.0 mg, 85%).

## 5. Synthetic Application

### 5.1. Synthesis of (R)-2-(1-(4-Methoxyphenyl)-3-phenylpropyl)-4,4,5,5-tetramethyl-1,3,2-dioxaborolane (**12**)

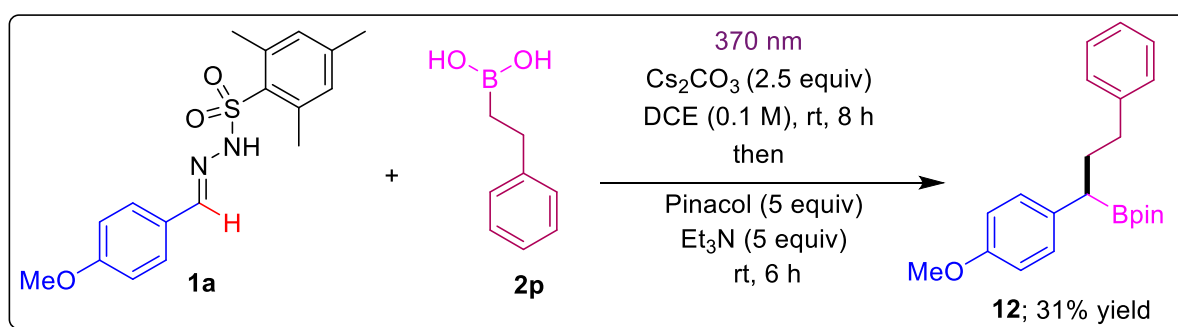

To an oven dried 5 mL glass vial was charged with magnetic stir bar, *N*-mesitylene-sulfonylhydrazone **1a** (66.4 mg, 0.2 mmol, 1.0 equiv) was added, then Cs<sub>2</sub>CO<sub>3</sub> (197.7 mg, 0.6 mmol, 3 equiv) and phenylethyl boronic acid **2p** (45.0 mg, 0.3 mmol, 1.5 equiv) were added followed by DCE solvent (0.1 M, 1mL) under nitrogen atmosphere. The reaction mixture was stirred in presence of 370 nm LEDs at room temperature using fan for 8 h. Upon the complete consumption of the starting materials, pinacol (118.0 mg, 1 mmol, 5 equiv) along with Et<sub>3</sub>N

(101.1 mg, 1 mmol, 5 equiv) and stirred at rt for 6 h. Upon the complete consumption of the starting materials, the reaction mixture was diluted with ethyl acetate and then passed through the celite pad. The organic solvent was removed under reduced pressure, and the crude obtained was separated by column chromatography on silica gel pad (2.5% EtOAc/hexanes) to afford the title product **12** (14 mg, 31%);  $^1\text{H NMR}$  (500 MHz,  $\text{CDCl}_3$ ):  $\delta$  7.28-7.24 (m, 2H), 7.18-7.13 (m, 5H), 6.83 (d,  $J$  = 7.7, 2H), 3.79 (s, 3H), 2.59-2.54 (m, 2H), 2.33-2.28 (m, 1H) 2.18-2.09 (m, 1H), 1.99-1.91 (m, 1H), 1.22 (s, 6H), 1.20 (s, 6H);  $^{13}\text{C NMR}$  (126 MHz,  $\text{CDCl}_3$ ):  $\delta$  157.4, 142.7, 134.9, 129.3, 128.6, 128.3, 125.7, 113.8, 83.4, 55.2, 35.4, 34.7, 24.8, 24.7;  $\delta$   $^{11}\text{B NMR}$  (160 MHz,  $\text{CDCl}_3$ ): -32.9 (s).

Spectral data matched with the reported literature.<sup>[19]</sup>

## 5.2 Synthesis of (*R*)-1-(4-Methoxyphenyl)-3-phenylpropan-1-ol (**13**)

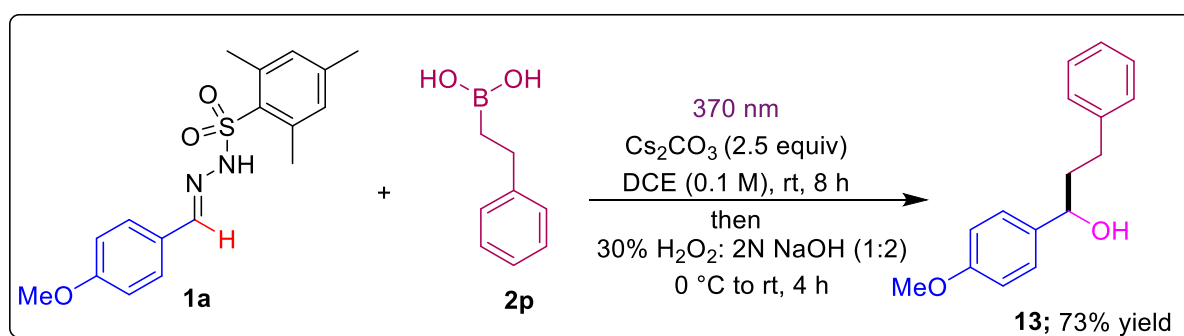

To an oven dried 5 mL glass vial was charged with magnetic stir bar, *N*-mesitylene-sulfonylhydrazone **1a** (66.4 mg, 0.2 mmol, 1.0 equiv) was added, then  $\text{Cs}_2\text{CO}_3$  (197.7 mg, 0.6 mmol, 3 equiv) and phenethyl boronic acid **2p** (45.0 mg, 0.3 mmol, 1.5 equiv) were added followed by DCE solvent (0.1 M, 1mL) under nitrogen atmosphere. The reaction mixture was stirred in presence of 370 nm LEDs at room temperature using fan for 8 h. Upon the complete consumption of the starting materials, the reaction mixture was set in 0 °C, followed by addition of 30%  $\text{H}_2\text{O}_2$ :2N NaOH (1:2). The reaction mixture was warmed to rt and stirred for 4 h and extracted with  $\text{CH}_2\text{Cl}_2$  and water, the combined organic layer was dried over anhydrous sodium sulphate and filtered the crude product was by chromatography on a column of silica gel eluted with (14% EtOAc/hexanes) to give **13** (35 mg ,73%).  $^1\text{H NMR}$  (500 MHz,  $\text{CDCl}_3$ ):  $\delta$  7.29-7.25(m, 4H), 7.20-7.16 (m, 3H), 6.88 (d,  $J$  = 7.88, 2H), 4.62 (q,  $J$  = 7.38, 1H), 3.80 (s, 3H), 2.75-2.60 (m, 2H), 2.17-2.09 (m, 1H), 2.02-1.96 (m, 1H), 1.91 (br s, 1H);  $^{13}\text{C NMR}$  (126 MHz,  $\text{CDCl}_3$ ):  $\delta$  159.2, 140.9, 136.8, 128.58, 128.52, 127.3, 125.97, 114.02, 73.6, 55.4, 40.8, 32.2, 29.8.

Spectral data matched with the reported literature.<sup>[19]</sup>

## 6. UV-Vis spectra

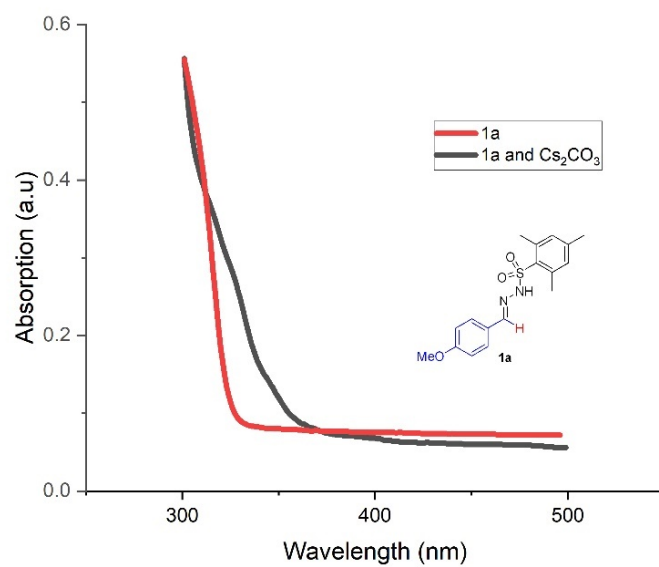

**Figure S1:** UV-vis spectrum of *N*-mesitylene-sulfonylhydrazone **1a** (0.1 M, red line) and **1a** +  $\text{Cs}_2\text{CO}_3$  (0.1M, black) in MeCN.

## 7. References:

1. J. R. Fulton, V. K. Aggarwal and J. de Vicente, *Eur. J. Org. Chem.*, 2005, **8**, 1479-1492.
2. S.-C. Sha, S. Tcyrulnikov, M. Li, B. Hu, Y. Fu, M. C. Kozlowski, and P. J. Walsh, *J. Am. Chem. Soc.*, 2018, **140**, 12415-12423.
3. D. Zhang, Z. Xu, T. Tang, L. Le, C. Wang, N. Kambe and R. Qiu, *Org. Lett.*, 2022, **24**, 3155-3160.
4. R. B. Bedford, P. B. Brenner, E. Carter, T. W. Carvell, P. M. Cogswell, T. Gallagher, J. H. Harvey, D. M. Murphy, E. C. Neeve, J. Nunn and D. R. Pye, *Chem.- Eur. J.*, 2014, **20**, 7935-7938.
5. X. Li, Y. Feng, L. Lin and G. Zhou, *J. Org. Chem.*, 2012, **77**, 10991-10995.
6. J. Zhang, G. Lu, J. Xu, H. Sun and Q. Shen, *Org. Lett.*, 2016, **18**, 2860-2863.
7. Q.-L. Wang, Z. Sun, H. Huang, G. Mao and G. -J. Deng, *Green Chemistry*, 2022, **24**, 3293-3299.
8. Z. Z. Li, X. Y. Cheng, N. Y. Yang, J. J. Chen, W. Y. Tang, J. Q. Bian, Y. F. Cheng, Z. L. Li, Q. S. Gu and X. Y. Liu, *Organometallics*, 2021, **40**, 2215-2219.
9. P. Guo, K. Wang, W. J. Jin, H. Xie, L. Qi, X. Y. Liu and X. Z. Shu, *J. Am. Chem. Soc.*, 2021, **143**, 513-523.
10. P. Pan, S. Liu, Y. Lan, H. Zeng and C. -J. Li, *Chem. Sci.*, 2022, **13**, 7165-7171.
11. J. Shi, T. Yuan, R. Wang, M. Zheng and X. Wang, *Green Chem.*, 2021, **23**, 3945-3949.
12. P. Maity, D. M. Shacklady-McAtee, G. P. A. Yap, E. R. Sirianni and M. P. Watson, *J. Am. Chem. Soc.*, 2013, **135**, 280-285.
13. Z. He, F. Song, H. Sun and Y. Huang, *J. Am. Chem. Soc.*, 2018, **140**, 2693-2699.
14. S. Yang, W. Tang, Z. Yang and J. Xu, *ACS Catal.*, 2018, **8**, 9320-9326.
15. F. Schoenebeck, J. A. Murphy, S.-Z. Zhou, Y. Uenoyama, Y. Miclo and T. Tuttle, *J. Am. Chem. Soc.*, 2007, **129**, 13368-13369.
16. A. E. Putra, K. Takigawa, H. Tanaka, Y. Ito, Y. Oe and T. Ohta, *Chem.- Eur. J.*, 2013, **2013**, 6344-6354.
17. X. Dan, Q. Yang, L. Xing, Y. Tang, W. Wang and Y. Cai, *Org. Lett.*, 2023, **25**, 4124-4129.
18. G. K. S. Prakash, C. Panja, A. Shakhmin, E. Shah, T. Mathew and G. A. Olah, *J. Org. Chem.*, 2009, **74**, 8659-8668.
19. C. Chunrui Sun, B. Potter and J. P. Morken, *J. Am. Chem. Soc.*, 2014, **136**, 6534-6537.

## 8. Spectral Data:

(*E*)-*N'*-(4-Methoxybenzylidene)-2,4,6-trimethylbenzenesulfonohydrazide (**1a**)

$^1\text{H}$  NMR (500 MHz,  $\text{CDCl}_3$ , 24 °C)

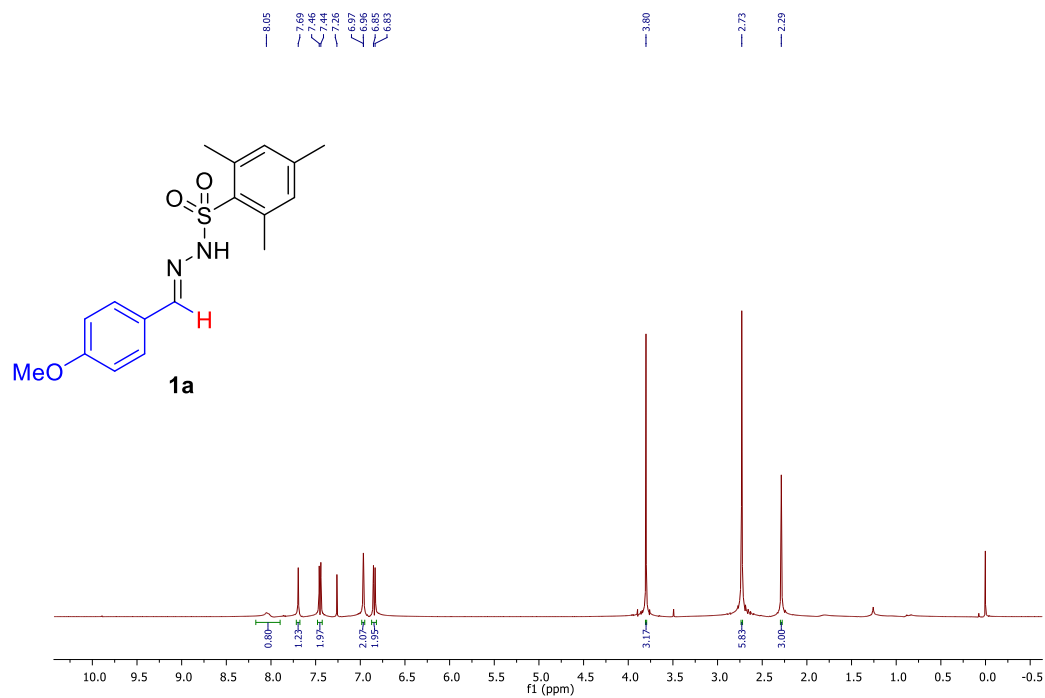

$^{13}\text{C}\{^1\text{H}\}$  NMR (126 MHz,  $\text{CDCl}_3$ , 24 °C)

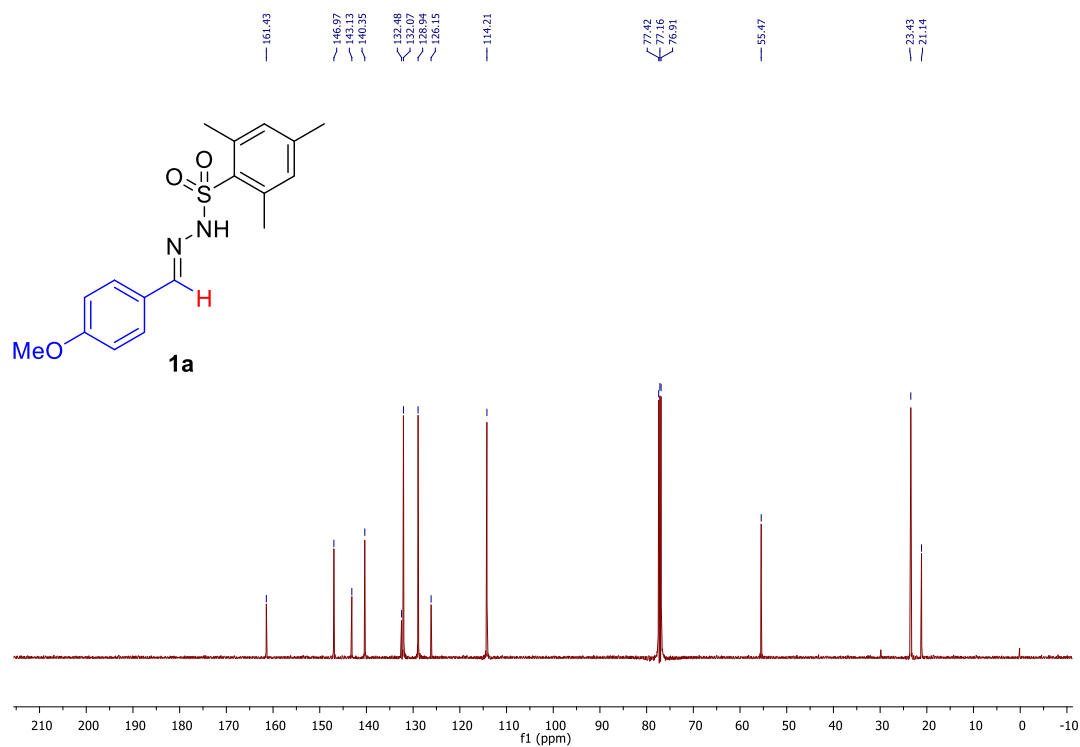

(*E*)-*N'*-(4-(Dimethylamino)benzylidene)-2,4,6-trimethylbenzenesulfonohydrazide (**1b**)

$^1\text{H}$  NMR (500 MHz,  $\text{CDCl}_3$ , 24 °C)

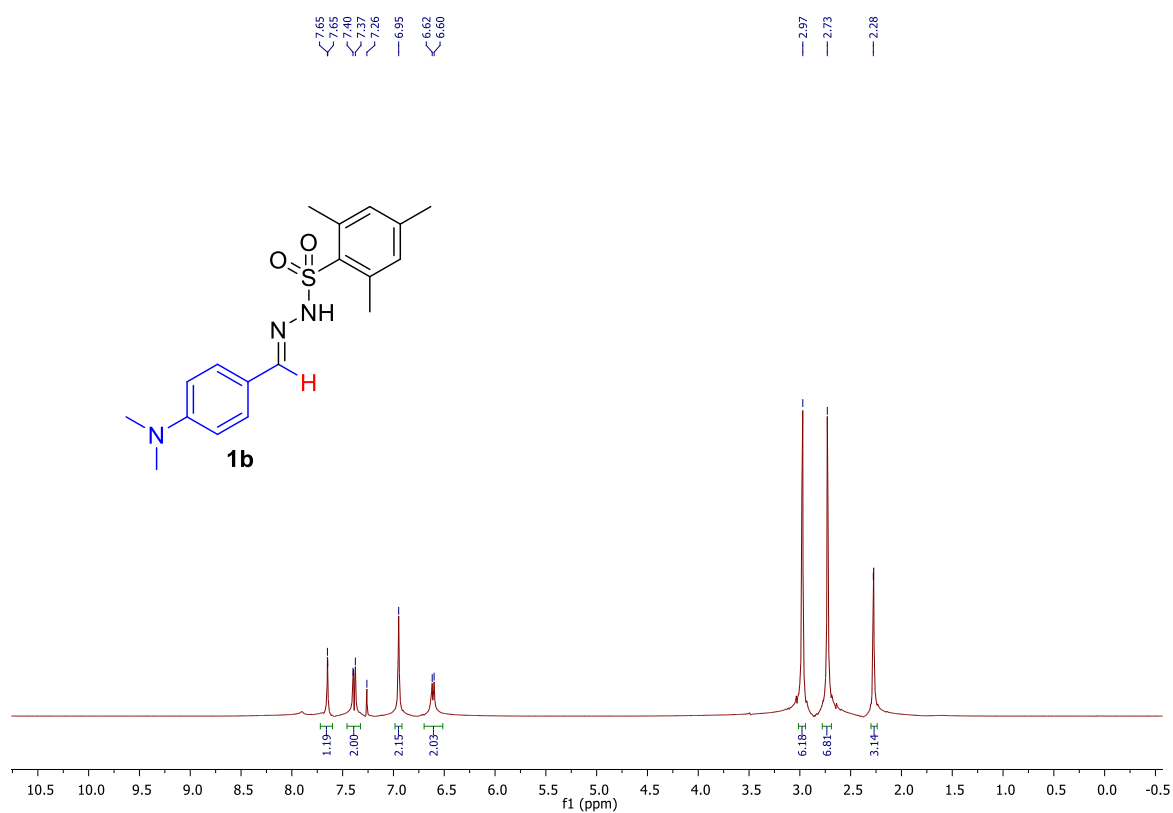

$^{13}\text{C}\{^1\text{H}\}$  NMR (126 MHz,  $\text{CDCl}_3$ , 24 °C)

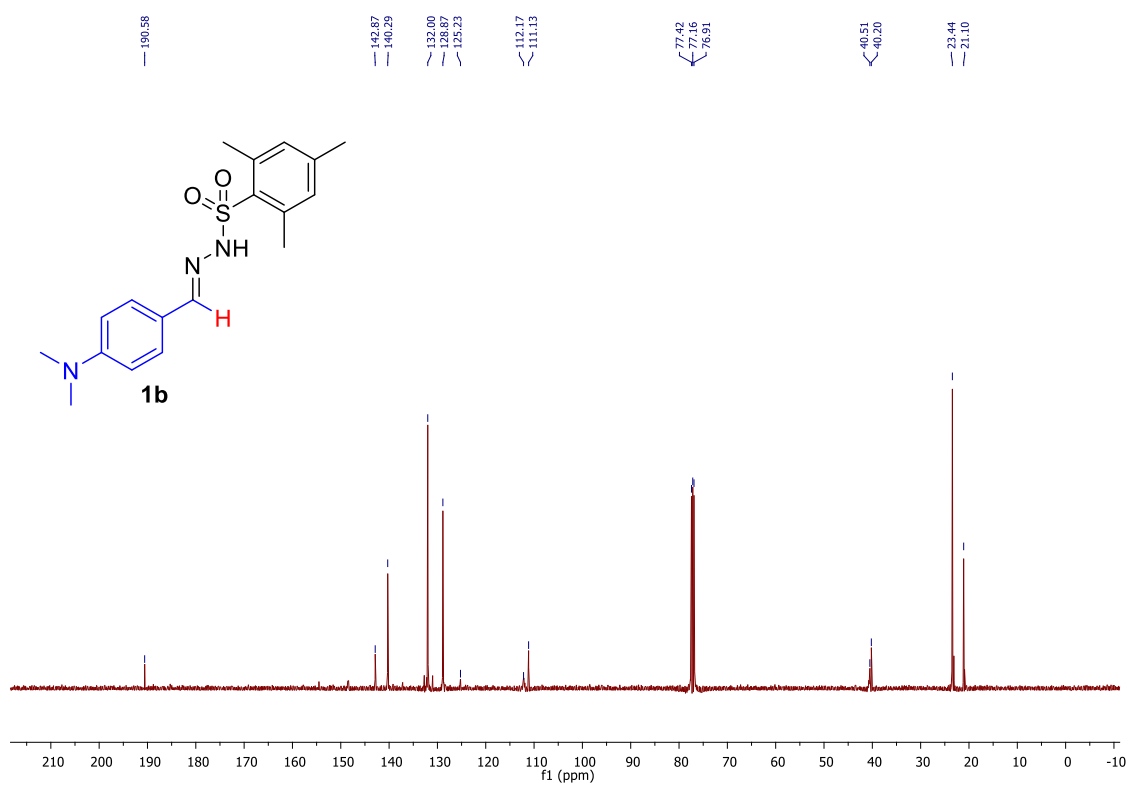

(*E*)-*N'*-Benzylidene-2,4,6-trimethylbenzenesulfonohydrazide (**1c**)

$^1\text{H}$  NMR (500 MHz,  $\text{CDCl}_3$ , 24 °C)

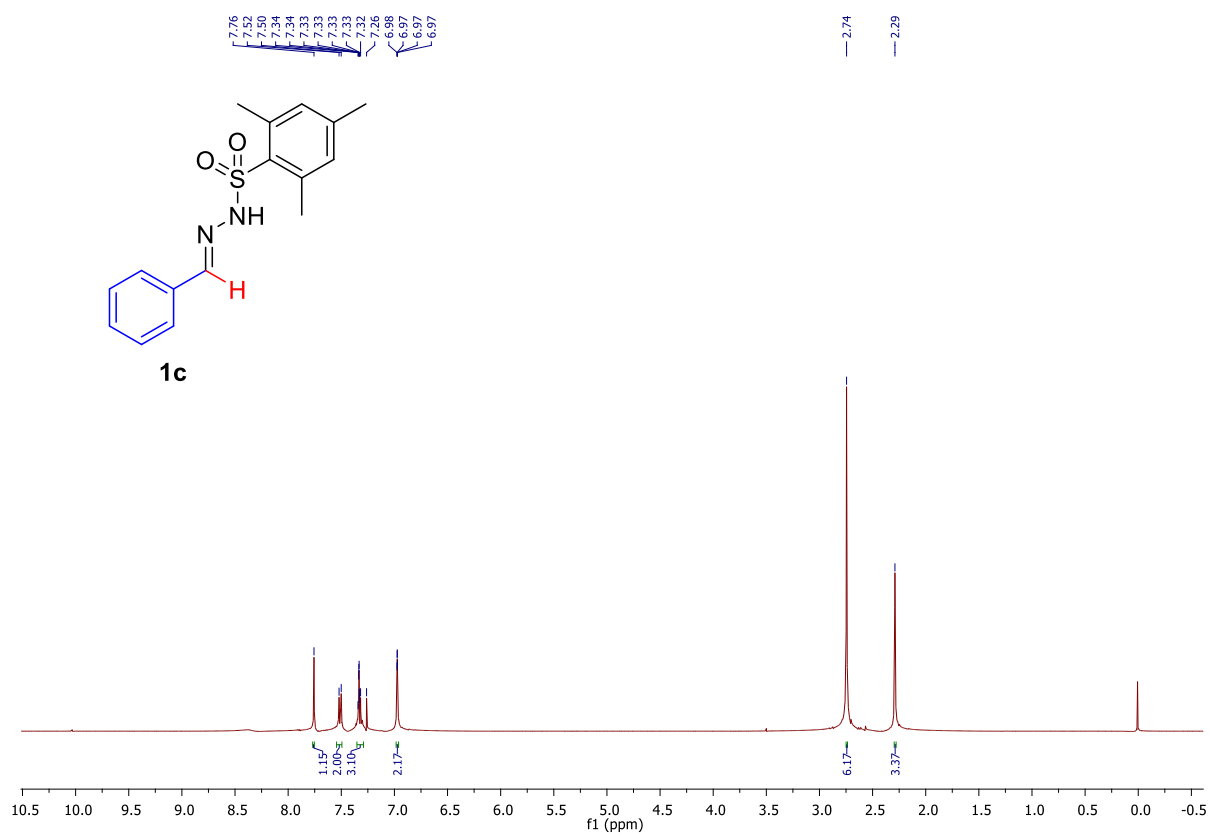

$^{13}\text{C}\{^1\text{H}\}$  NMR (126 MHz,  $\text{CDCl}_3$ , 24 °C)

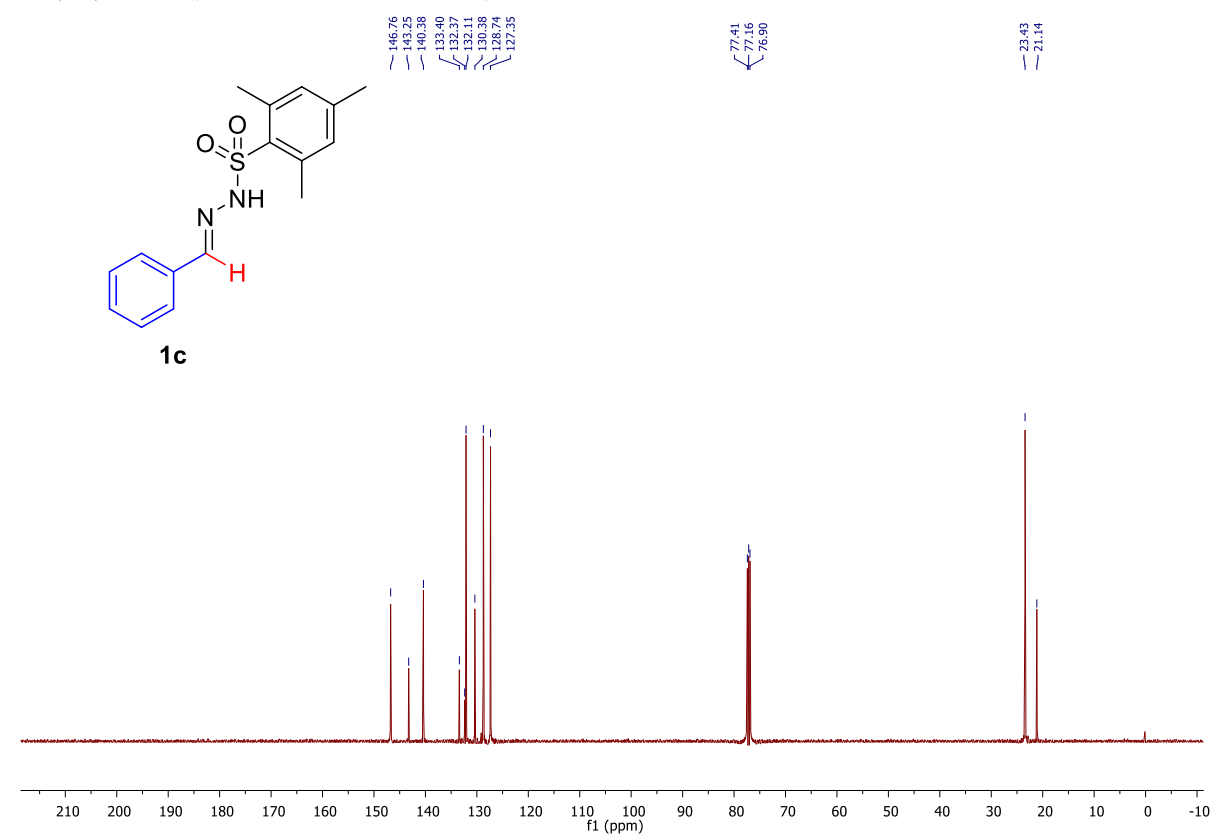

(*E*)-*N'*-(4-Hydroxybenzylidene)-2,4,6-trimethylbenzenesulfonohydrazide (**1d**)

$^1\text{H}$  NMR (500 MHz, DMSO- $\text{d}_6$ , 24 °C)

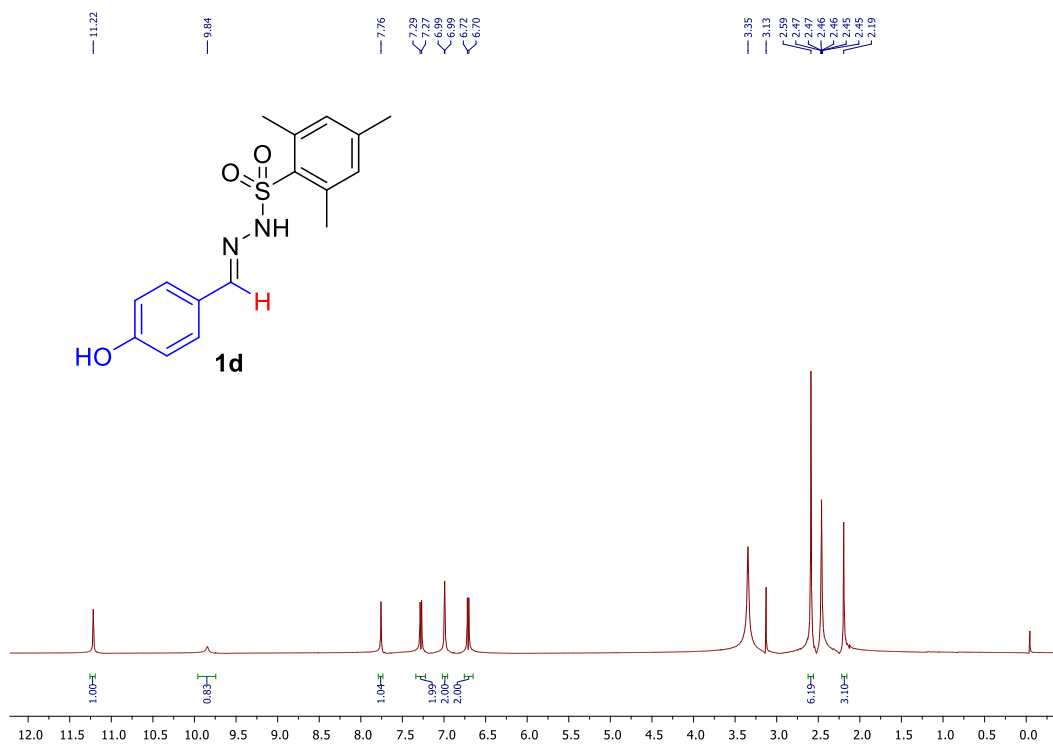

$^{13}\text{C}\{^1\text{H}\}$  NMR (126 MHz, DMSO- $\text{d}_6$ , 24 °C)

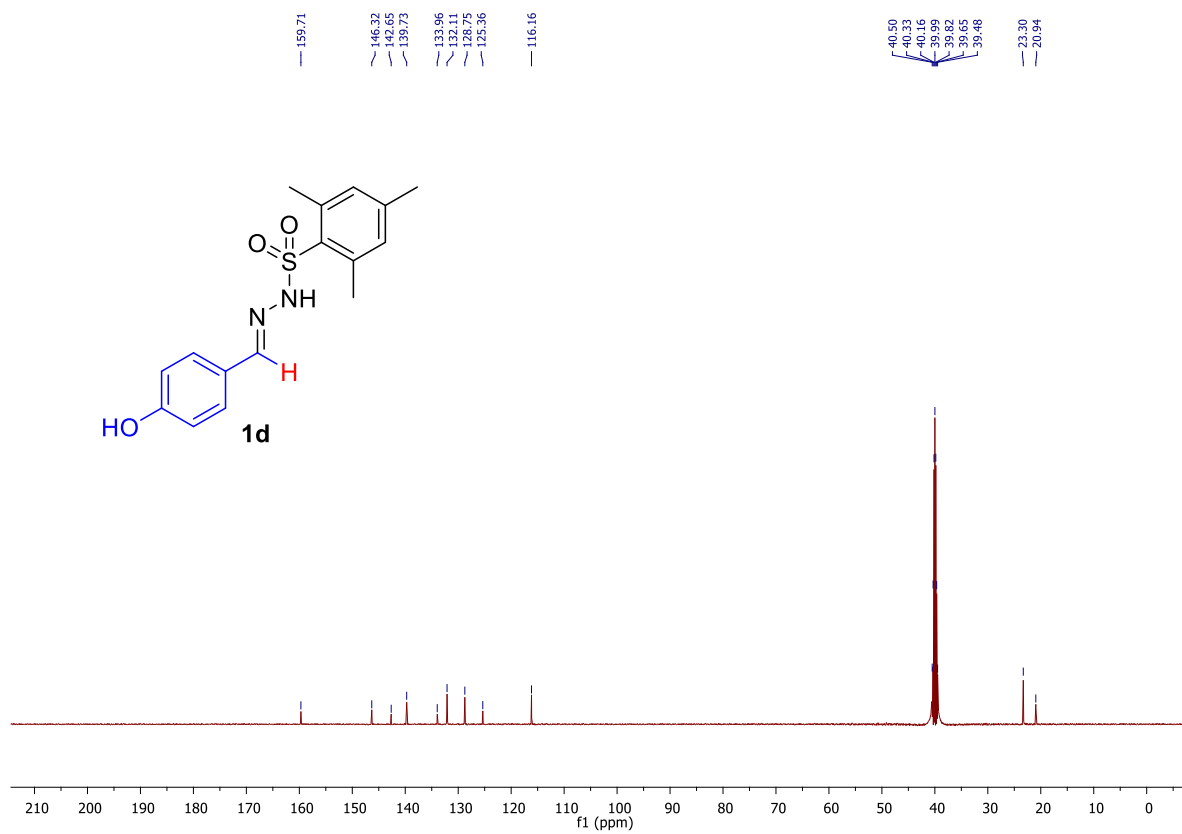

(*E*)-*N'*-(4-Chlorobenzylidene)-2,4,6-trimethylbenzenesulfonohydrazide (**1e**)

$^1\text{H}$  NMR (500 MHz,  $\text{CDCl}_3$ , 24 °C)

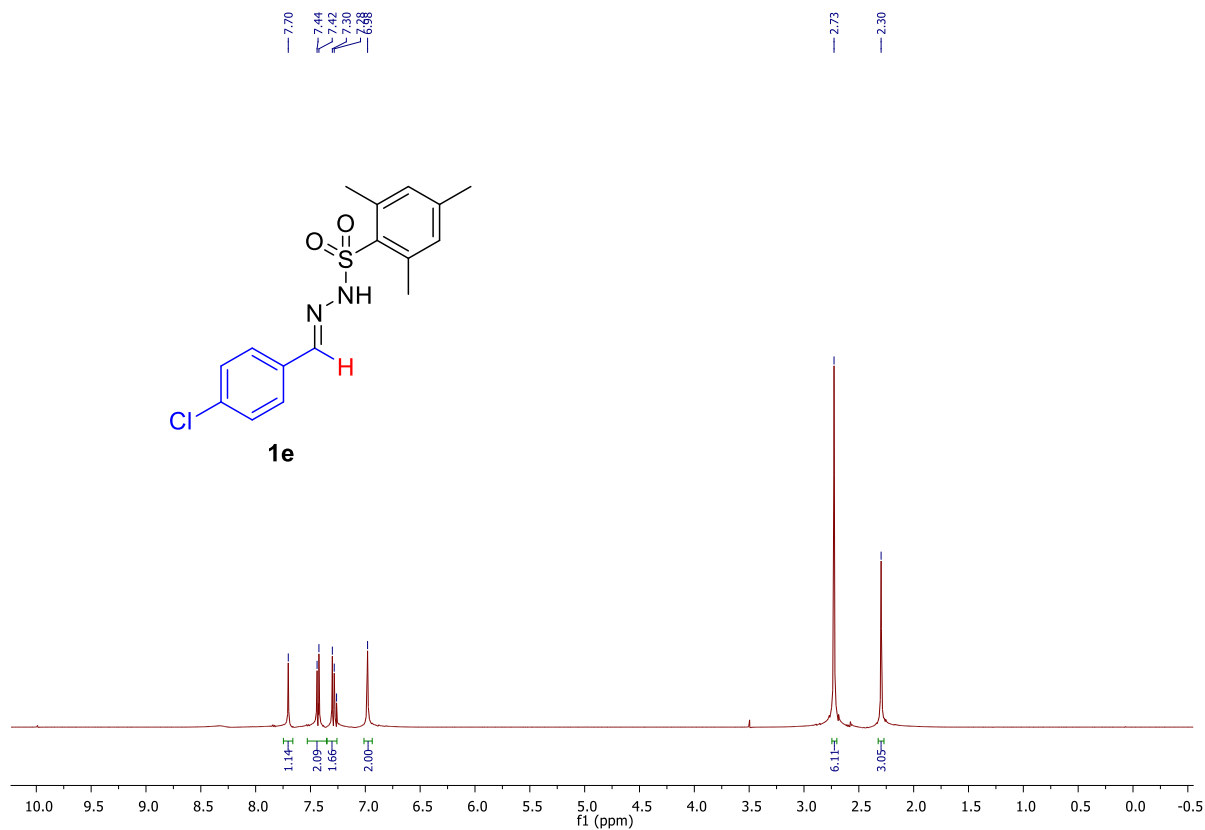

$^{13}\text{C}\{^1\text{H}\}$  NMR (126 MHz,  $\text{CDCl}_3$ , 24 °C)

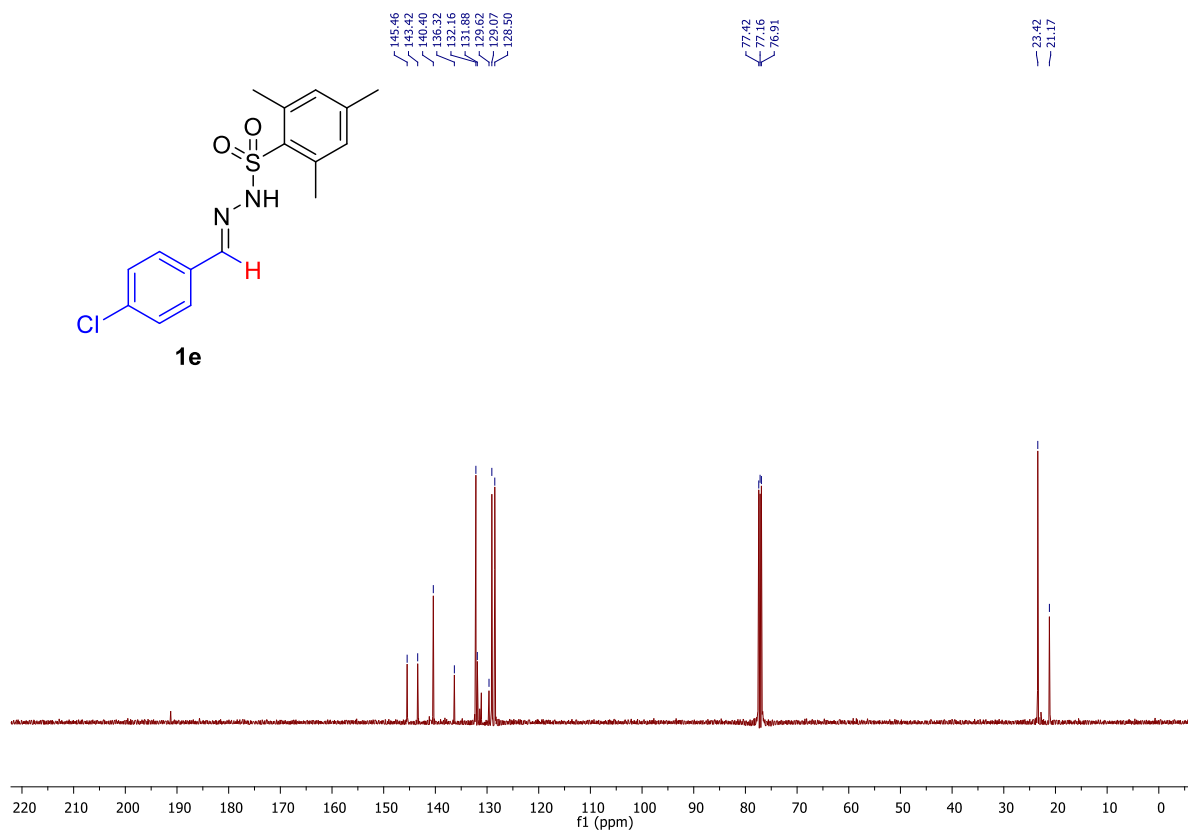

(*E*)-2,4,6-Trimethyl-*N'*-(naphthalen-2-ylmethylene)benzenesulfonohydrazide (**1f**)

$^1\text{H}$  NMR (500 MHz,  $\text{CDCl}_3$ , 24 °C)

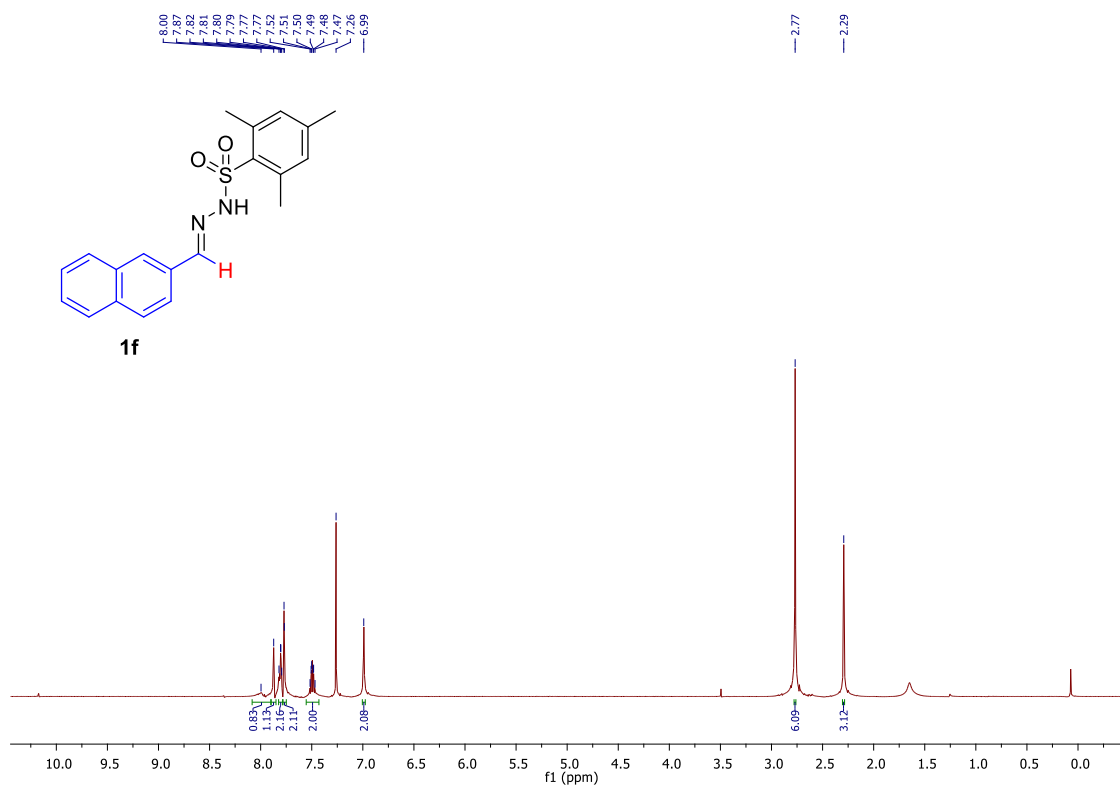

$^{13}\text{C}\{^1\text{H}\}$  NMR (126 MHz,  $\text{CDCl}_3$ , 24 °C)

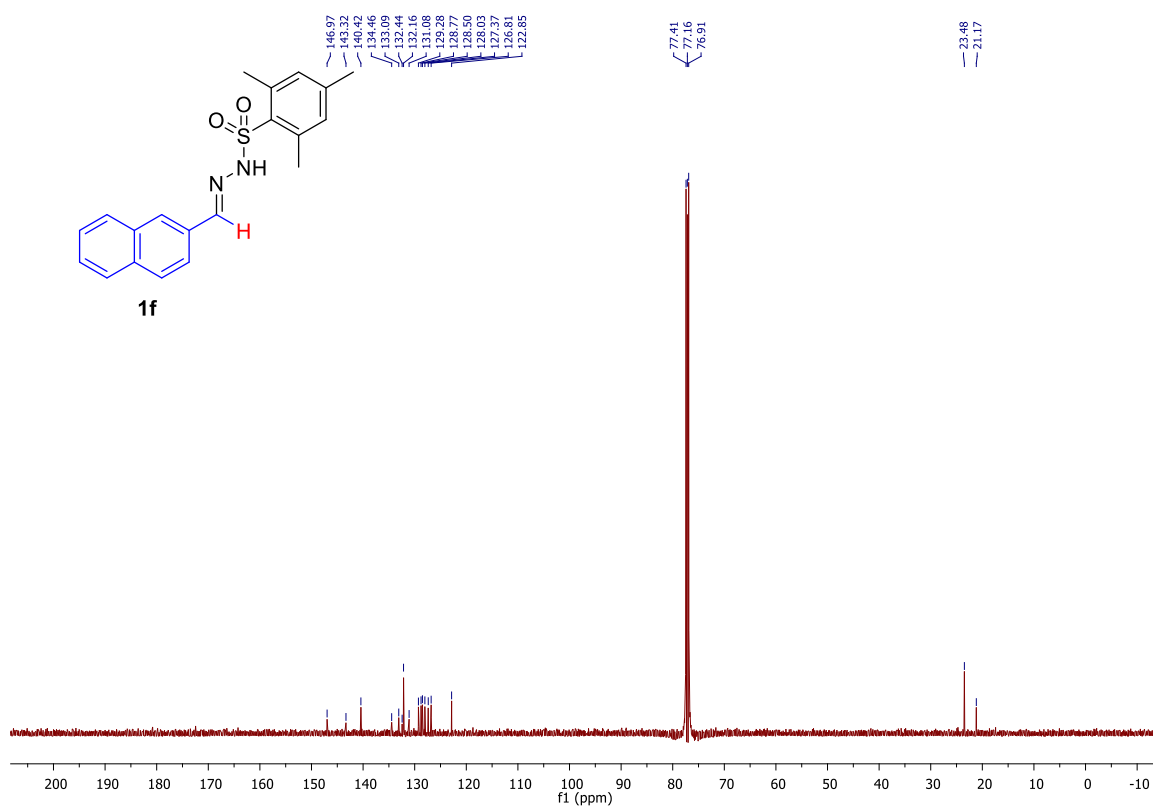

(*E*)-2,4,6-Trimethyl-*N'*-(pyridin-3-ylmethylene)benzenesulfonohydrazide (**1g**)

$^1\text{H}$  NMR (500 MHz, DMSO- $\text{d}_6$ , 24  $^\circ\text{C}$ )

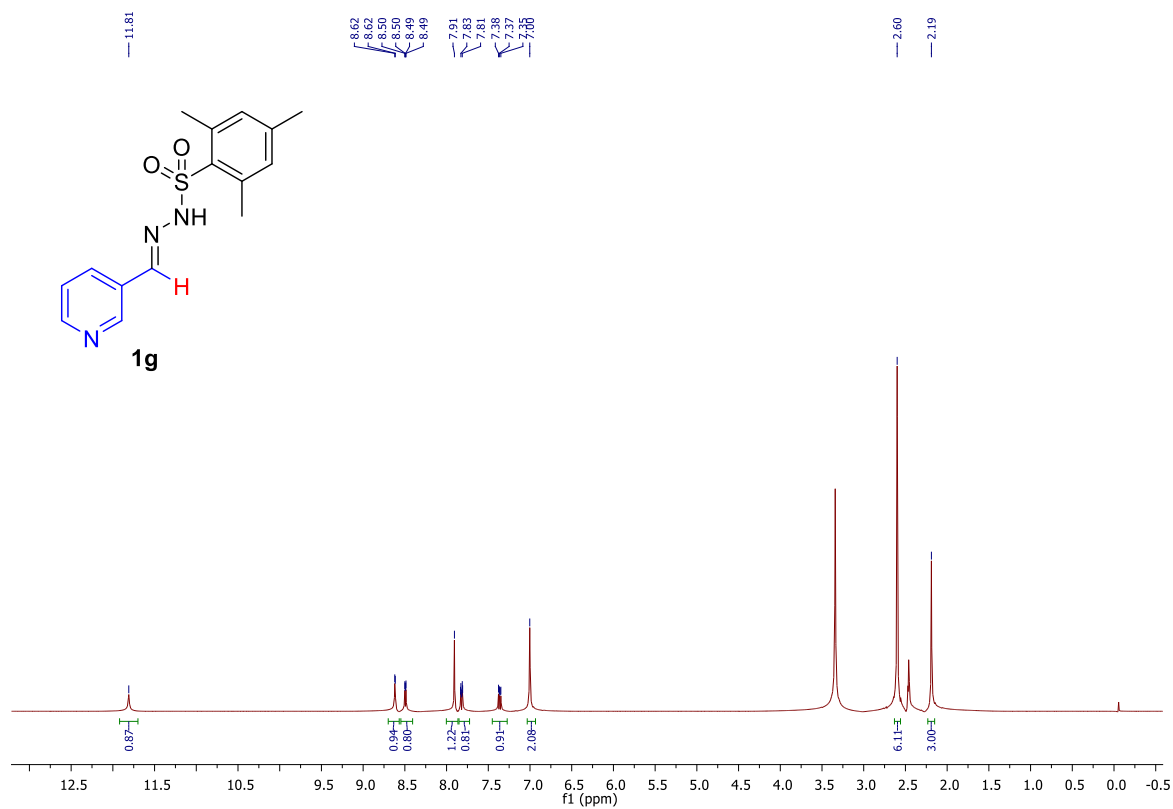

$^{13}\text{C}\{^1\text{H}\}$  NMR (126 MHz, DMSO- $\text{d}_6$ , 24  $^\circ\text{C}$ )

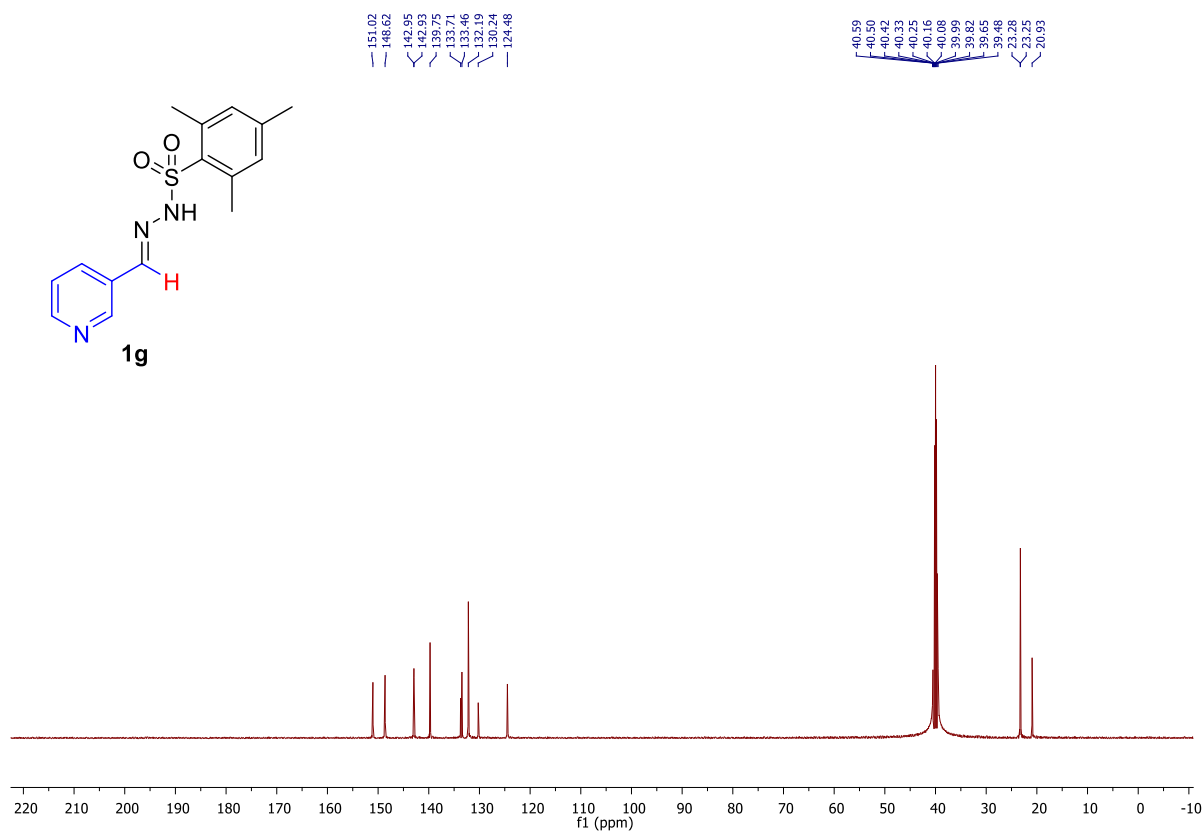

(*E*)-4-((2-(Mesitylsulfonyl)hydrazineylidene)methyl)phenyl 2-(4-isobutylphenyl)propanoate (**1h**)

$^1\text{H}$  NMR (500 MHz,  $\text{CDCl}_3$ , 24 °C)

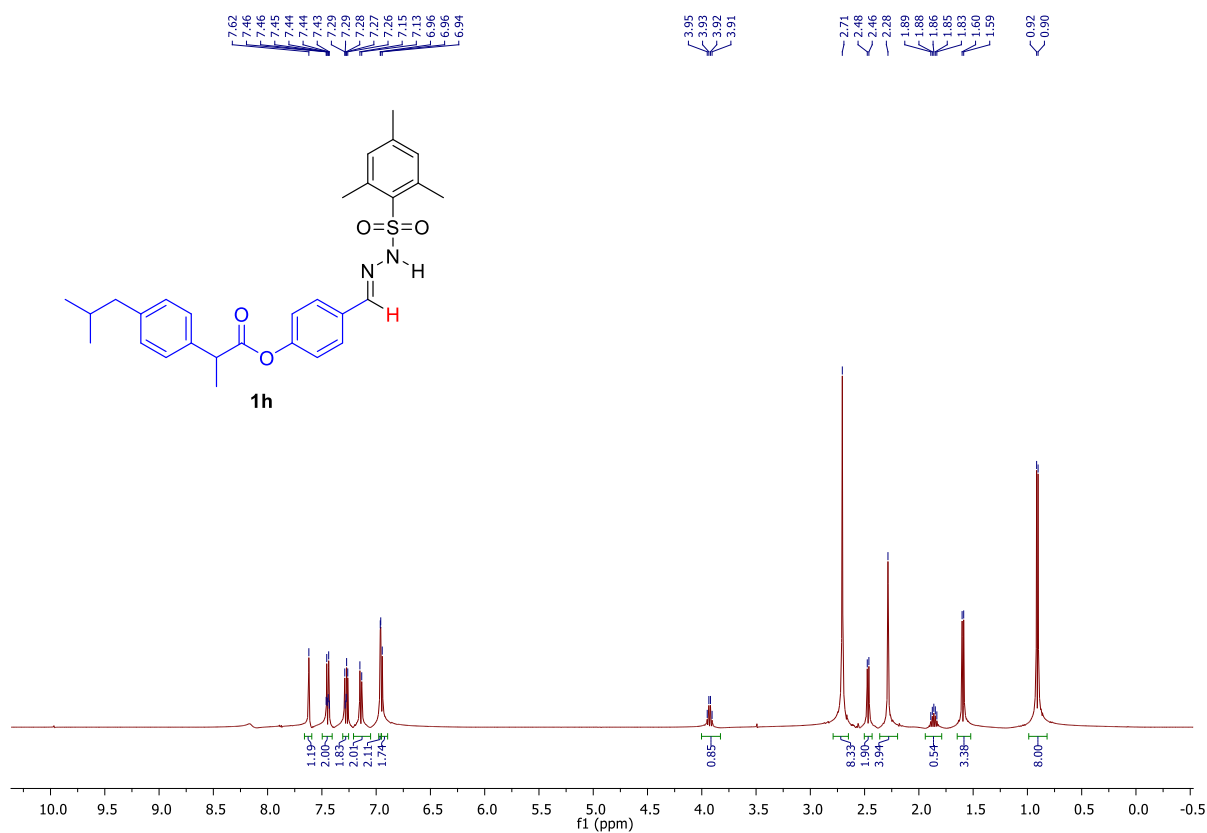

$^{13}\text{C}\{^1\text{H}\}$  NMR (126 MHz,  $\text{CDCl}_3$ , 24°C)

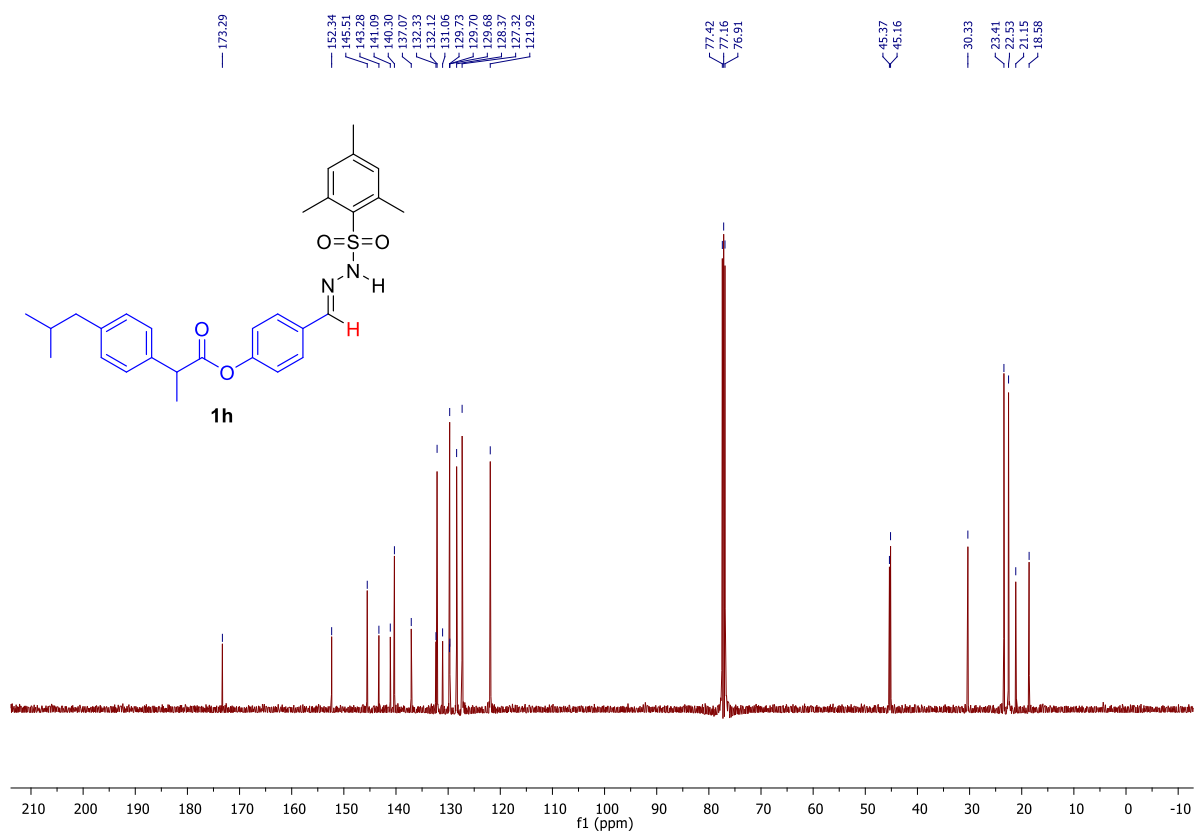

(*E*)-2,4,6-Trimethyl-*N'*-(1-phenylethylidene)benzenesulfonohydrazide (**4a**)

$^1\text{H}$  NMR (500 MHz,  $\text{CDCl}_3$ , 24 °C)

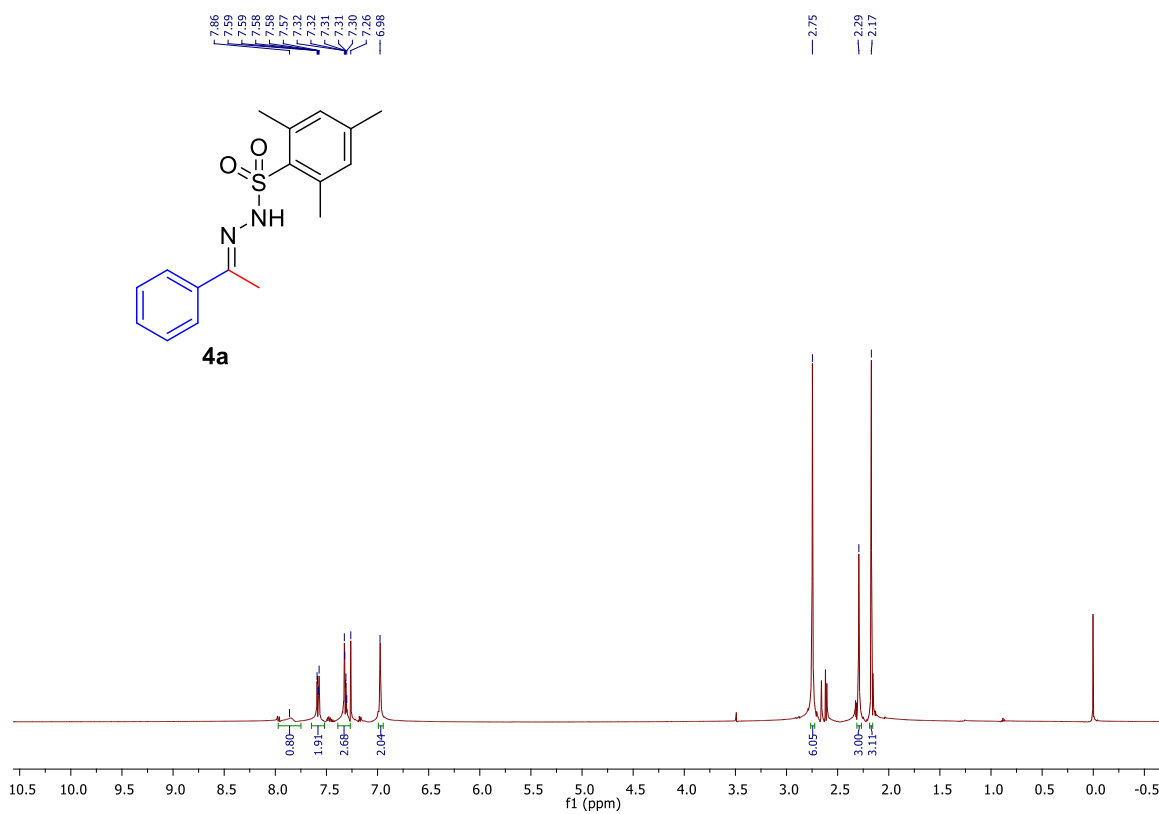

$^{13}\text{C}\{^1\text{H}\}$  NMR (126 MHz,  $\text{CDCl}_3$ , 24 °C)

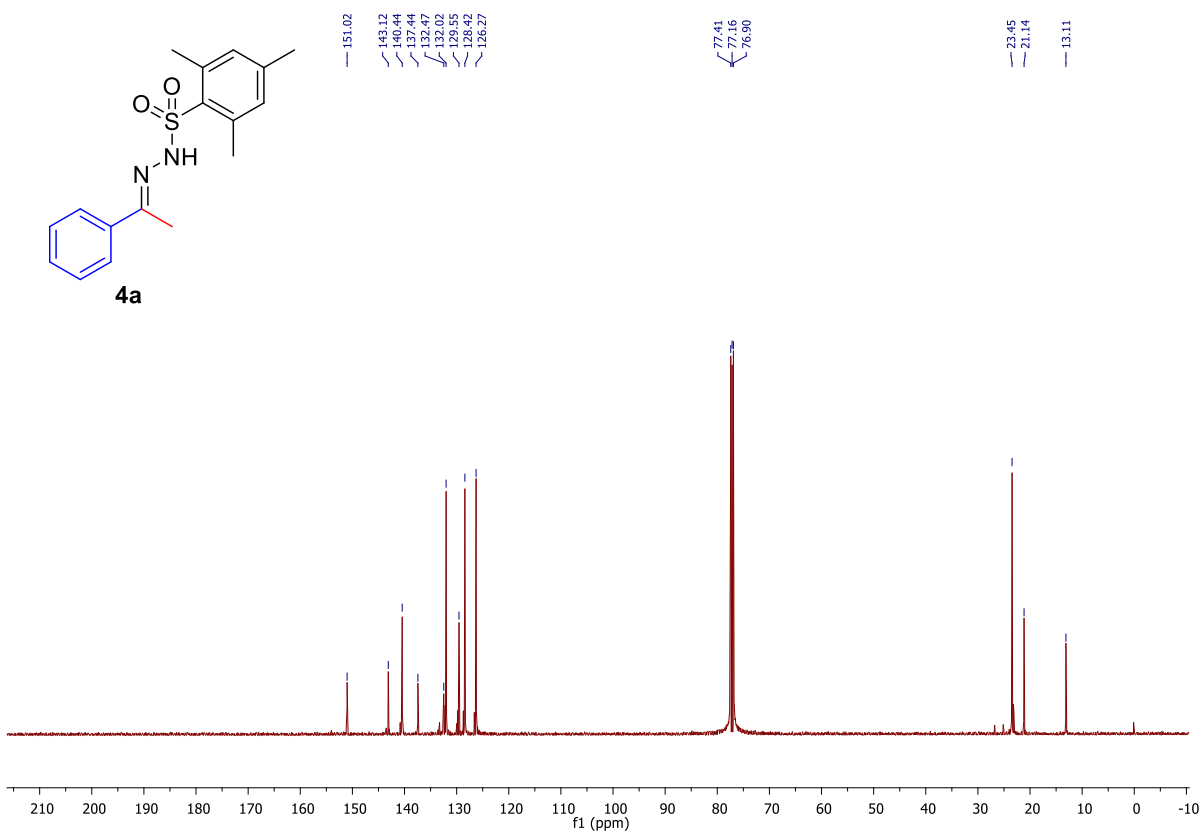

(*E*)-*N'*-(1-(4-Methoxyphenyl) ethylidene)-2,4,6-trimethylbenzenesulfonohydrazide (**4b**)

$^1\text{H}$  NMR (500 MHz,  $\text{CDCl}_3$ , 24 °C)

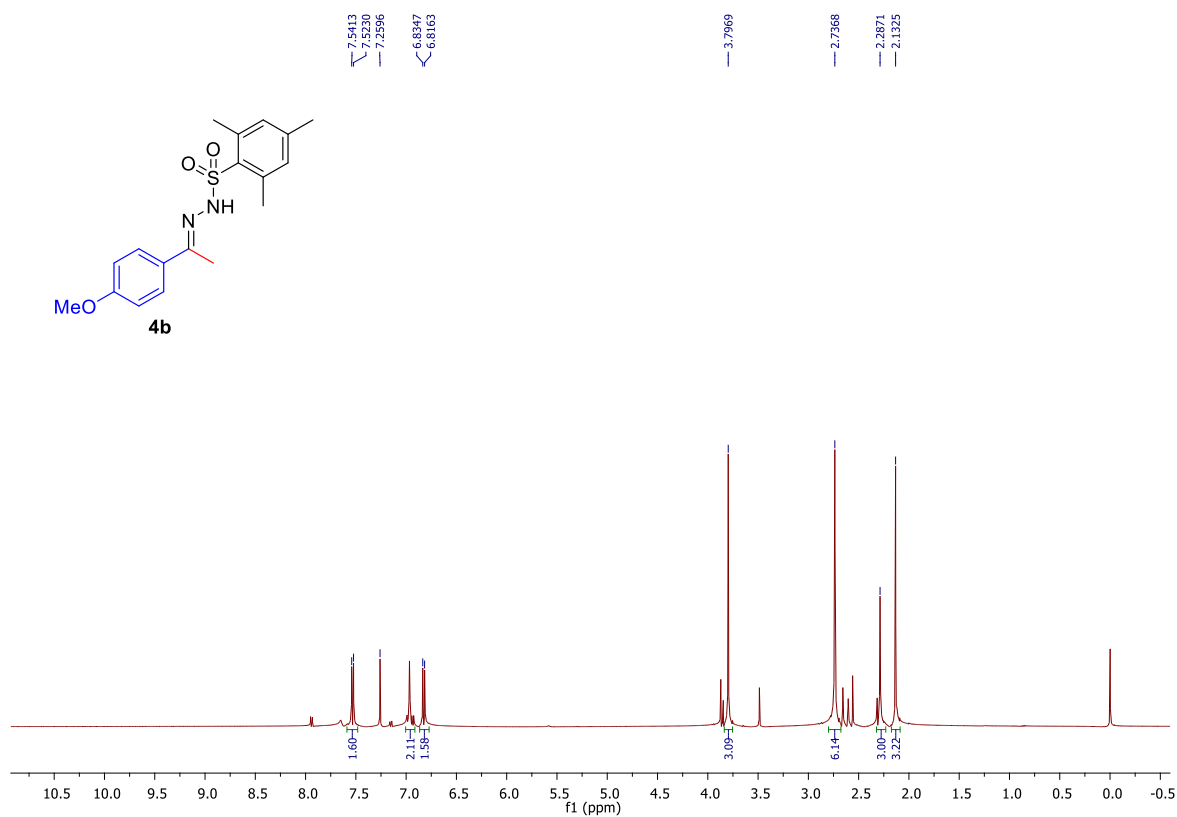

$^{13}\text{C}\{^1\text{H}\}$  NMR (126 MHz,  $\text{CDCl}_3$ , 24°C)

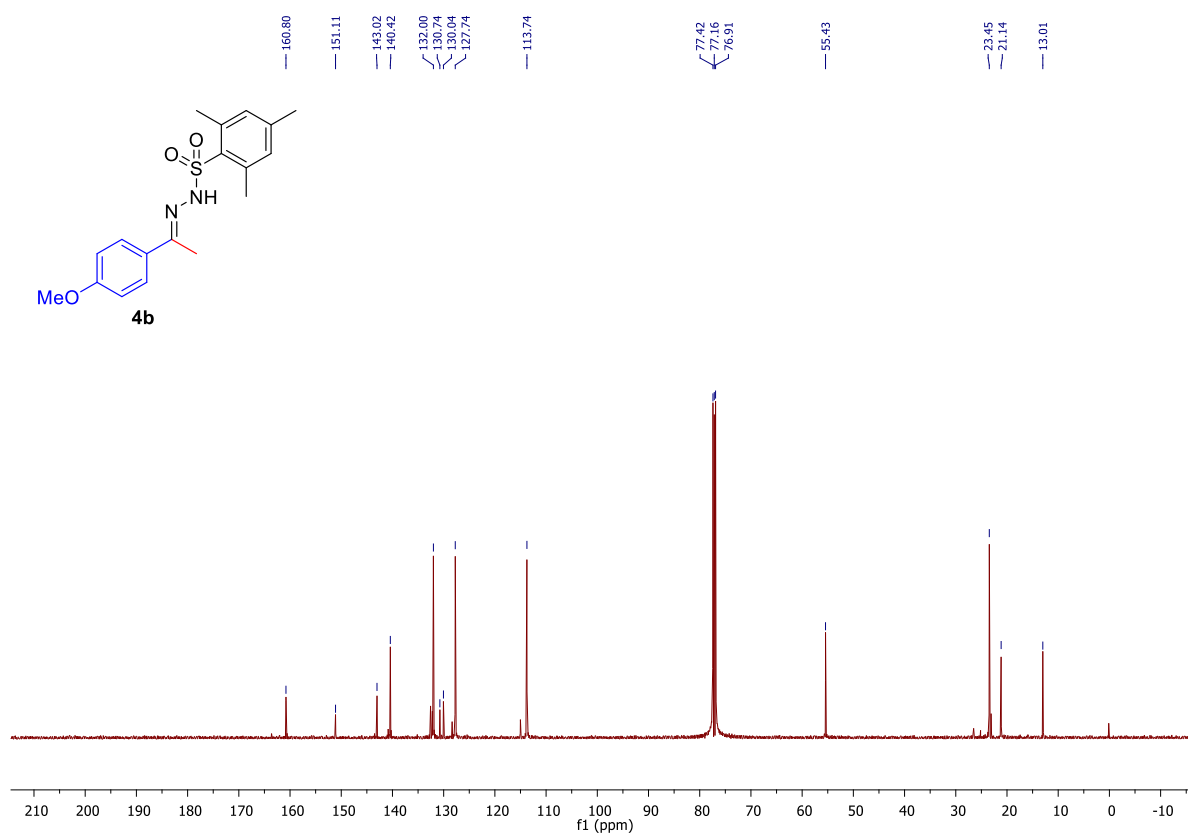

(*E*)-*N'*-(1-(1H-Indol-2-yl)ethylidene)-2,4,6-trimethylbenzenesulfonylhydrazide (**4c**)

$^1\text{H}$  NMR (500 MHz, DMSO- $d_6$ , 24 °C)

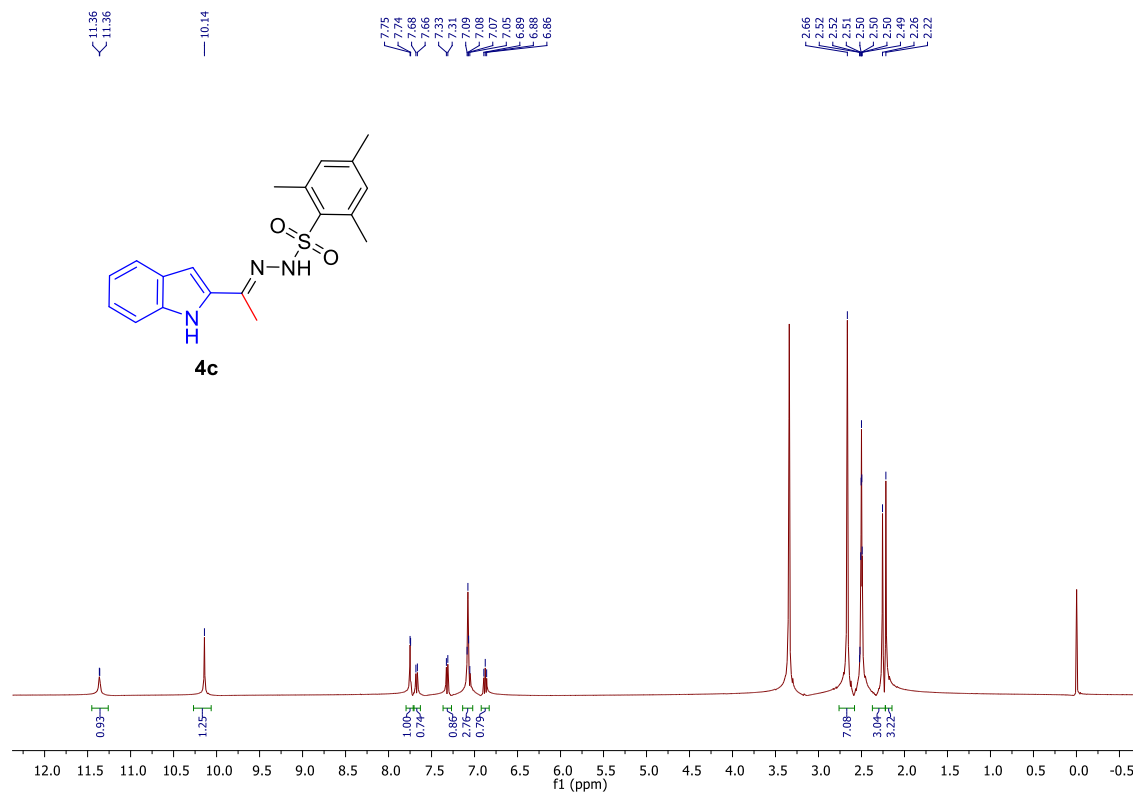

$^{13}\text{C}\{^1\text{H}\}$  NMR (126 MHz, DMSO- $d_6$ , 24 °C)

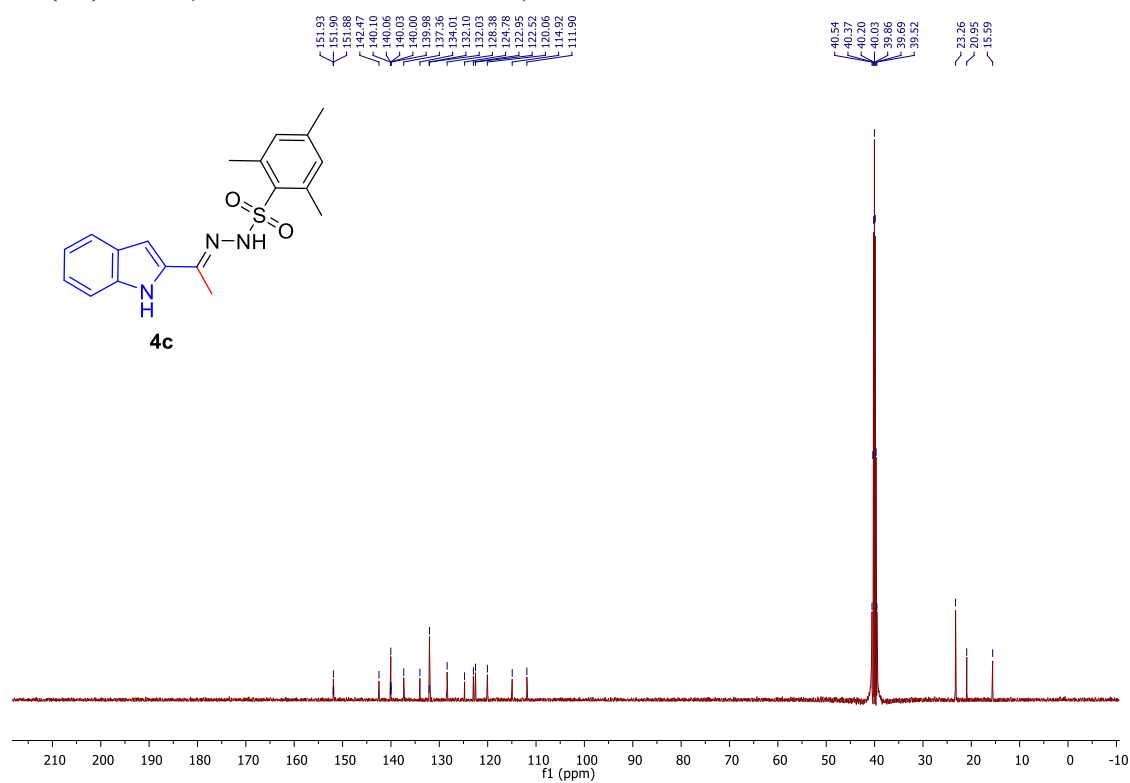

*N',N'''-((1E,1'E)-1,4-Phenylenebis(methaneylylidene))bis(2,4,6-trimethylbenzenesulfonohydrazide)*  
**(6)**

$^1\text{H}$  NMR (500 MHz, DMSO- $d_6$ , 24 °C)

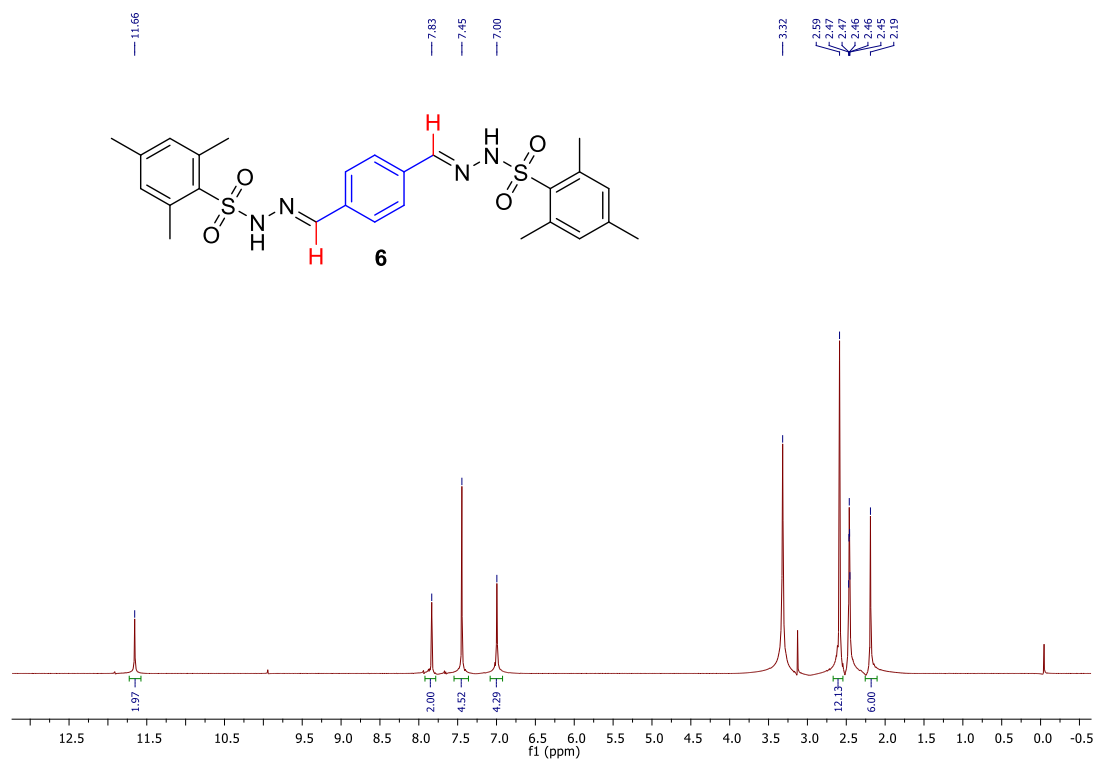

$^{13}\text{C}\{^1\text{H}\}$  NMR (126 MHz, DMSO- $d_6$ , 24 °C)

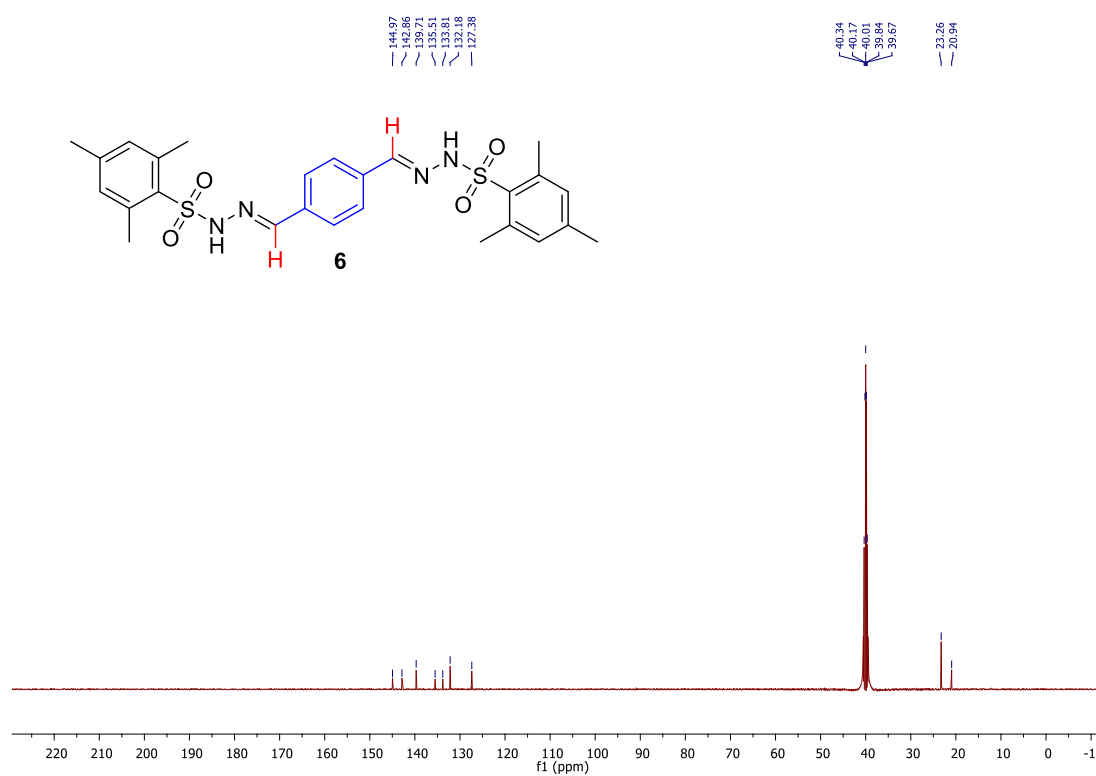

*N'*-(diphenylmethylene)-2,4,6-trimethylbenzenesulfonylhydrazide (**8**)

$^1\text{H}$  NMR (500 MHz,  $\text{CDCl}_3$ , 24 °C)

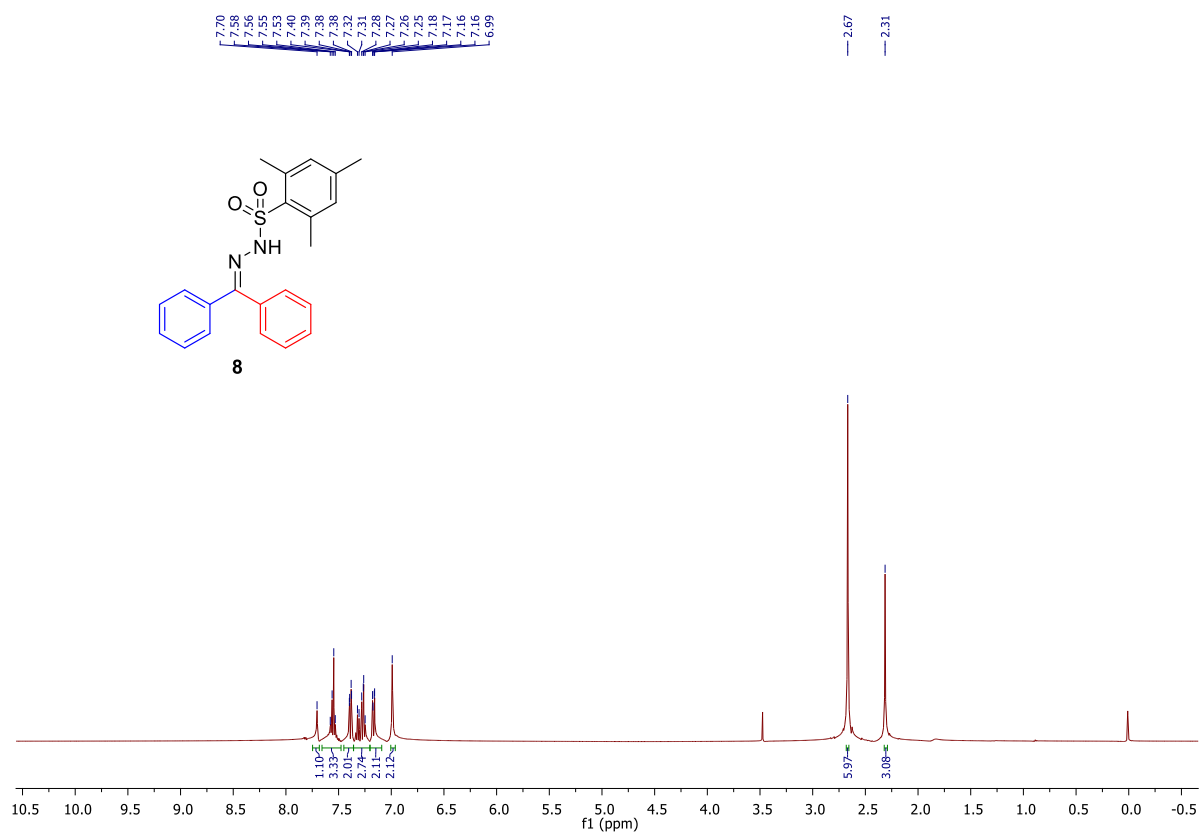

$^{13}\text{C}$  { $^1\text{H}$ } NMR (126 MHz,  $\text{CDCl}_3$ , 24 °C)

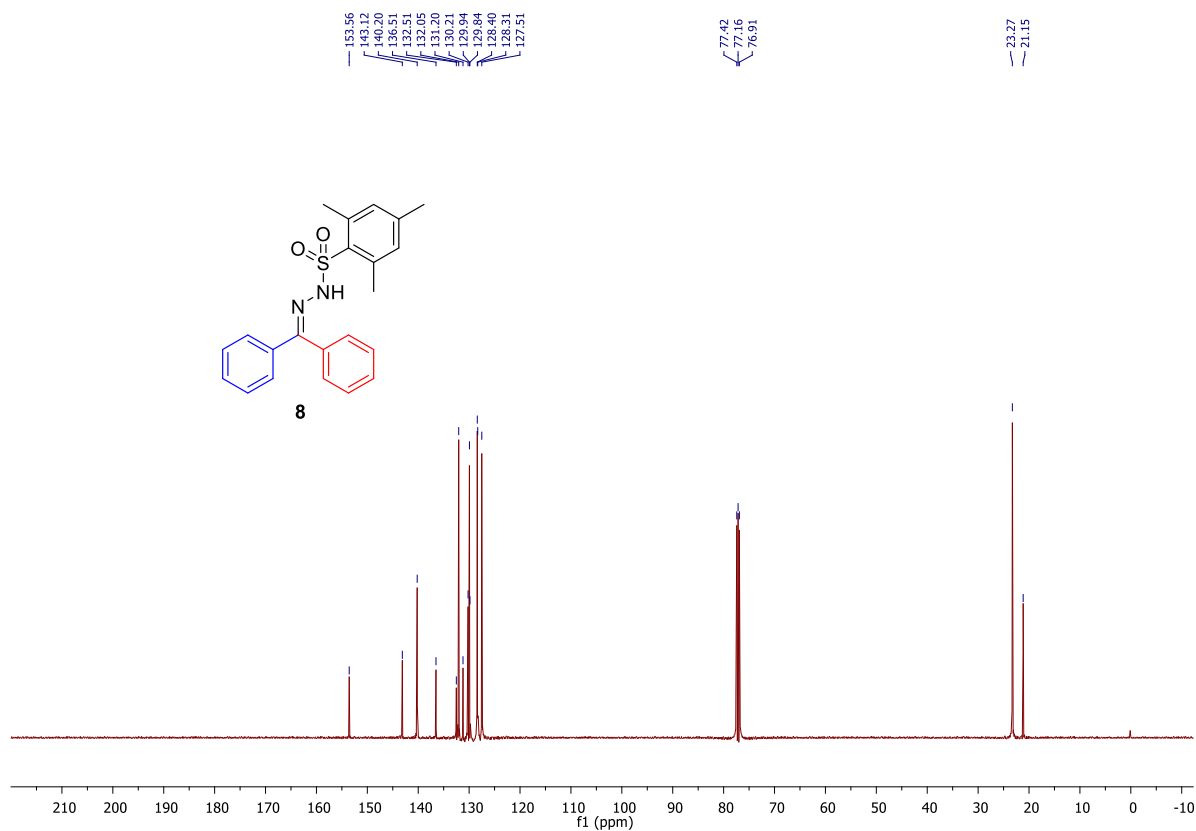

1-Benzyl-4-methoxybenzene (**3aa**)

$^1\text{H}$  NMR (500 MHz,  $\text{CDCl}_3$ , 24 °C)

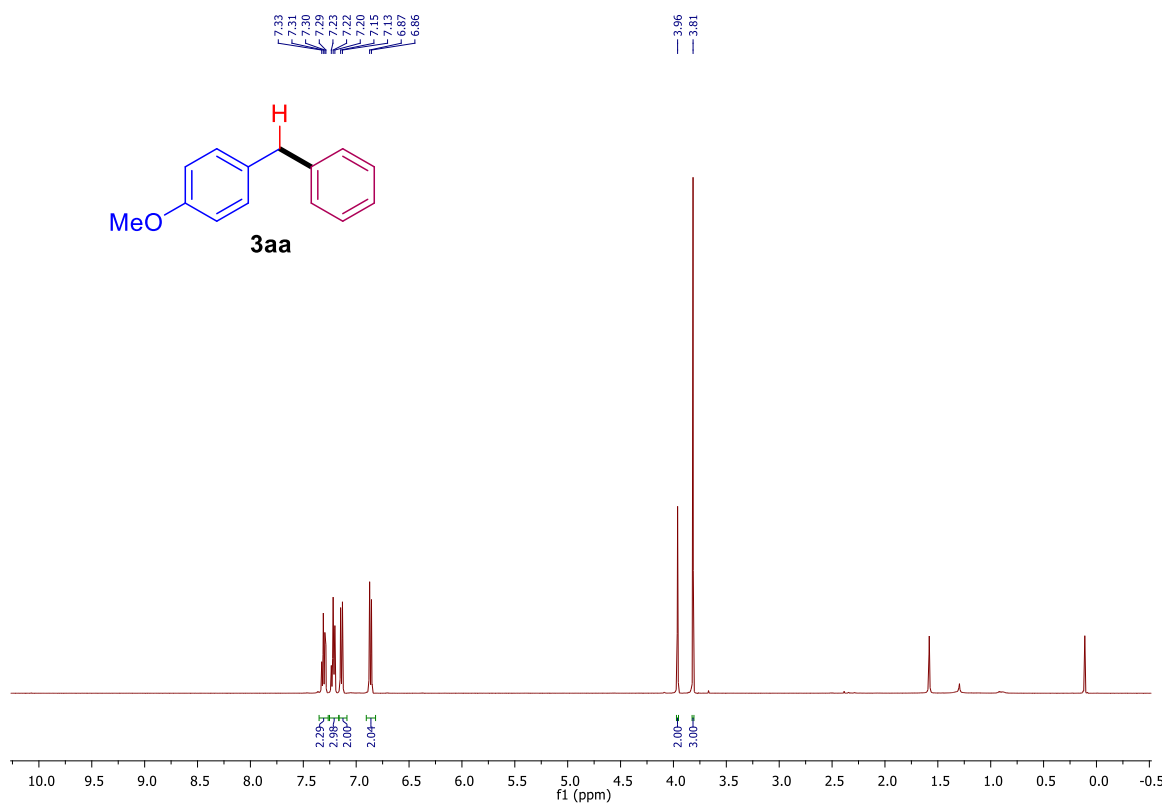

$^{13}\text{C}\{^1\text{H}\}$  NMR (126 MHz,  $\text{CDCl}_3$ , 24 °C)

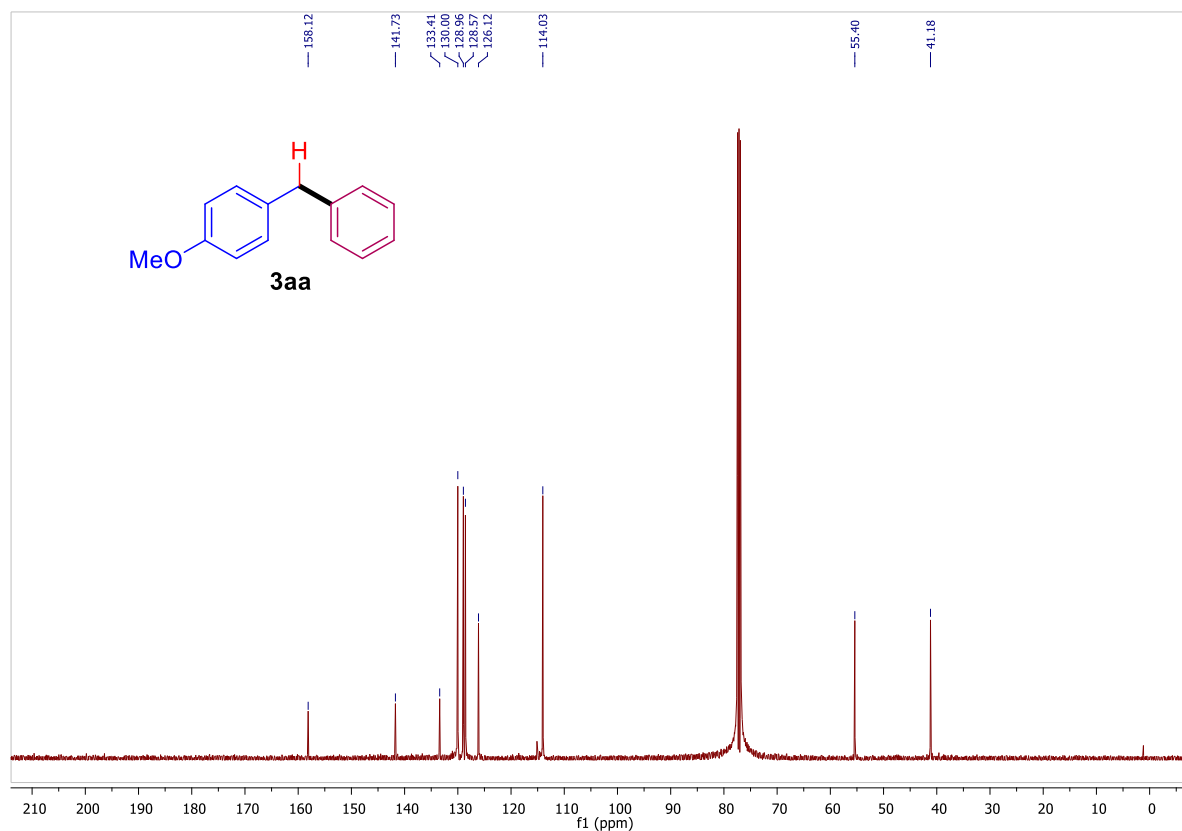

4-Benzyl-N,N-dimethylaniline (**3ba**)

$^1\text{H}$  NMR (500 MHz,  $\text{CDCl}_3$ , 24 °C)

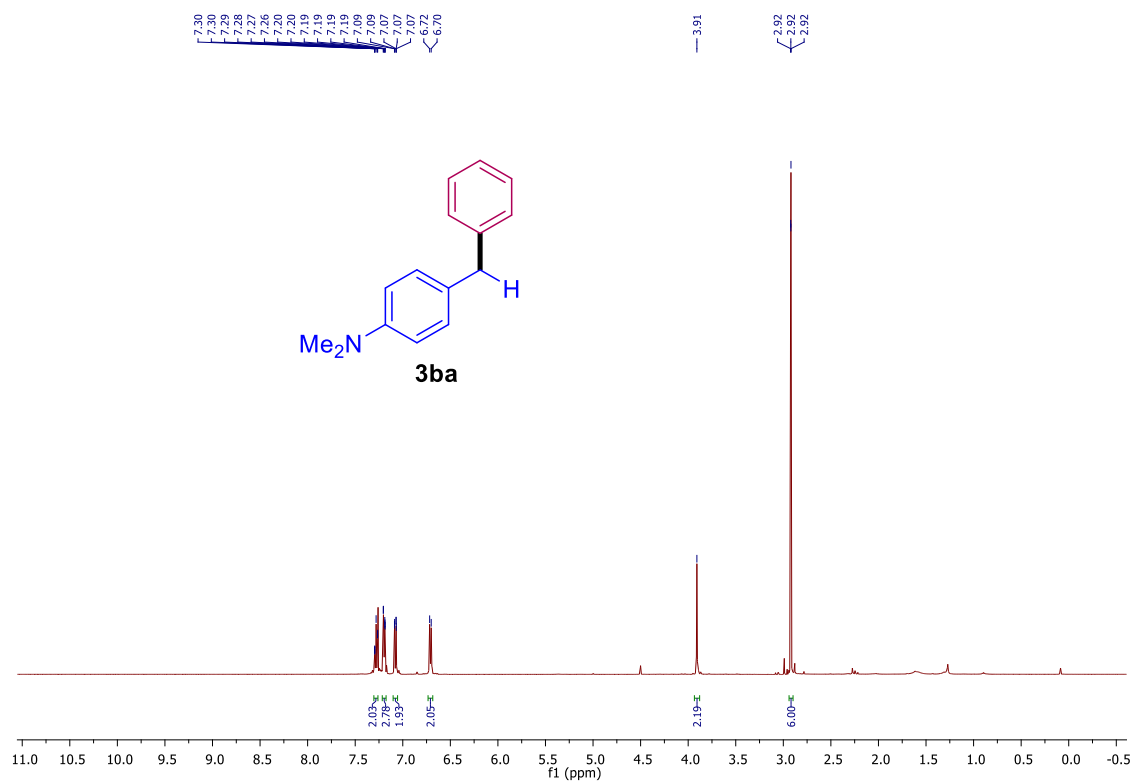

$^{13}\text{C}\{^1\text{H}\}$  NMR (126 MHz,  $\text{CDCl}_3$ , 24 °C)

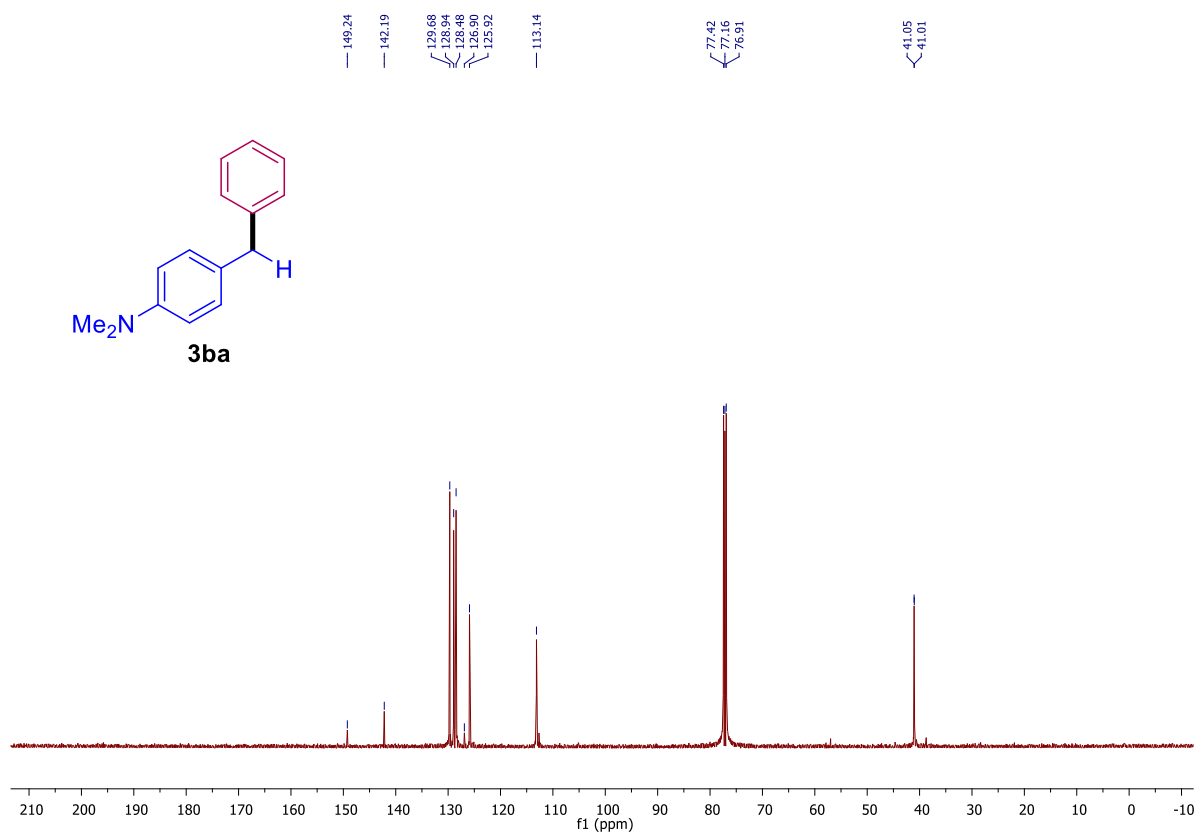

# Diphenylmethane (**3ca**)

$^1\text{H}$  NMR (500 MHz,  $\text{CDCl}_3$ , 24 °C)

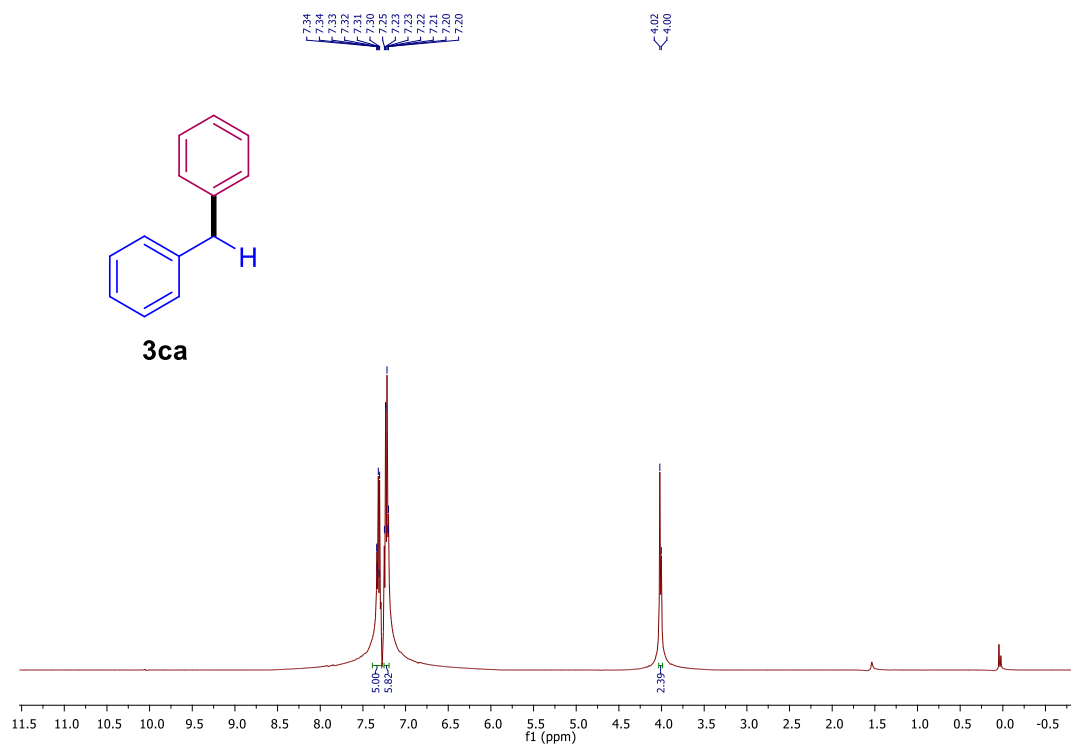

$^{13}\text{C}\{^1\text{H}\}$  NMR (126 MHz,  $\text{CDCl}_3$ , 24 °C)

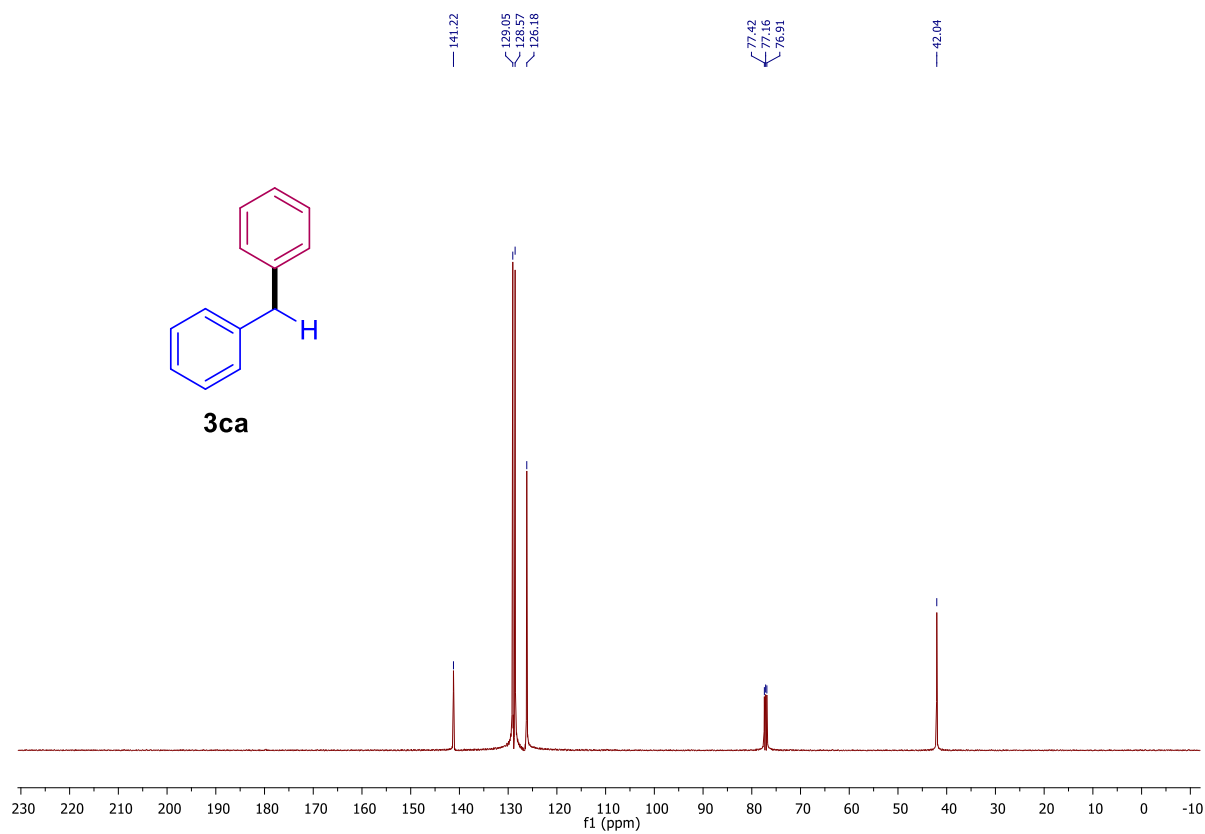

# Benzylphenol (**3da**)

$^1\text{H}$  NMR (500 MHz,  $\text{CDCl}_3$ , 24 °C)

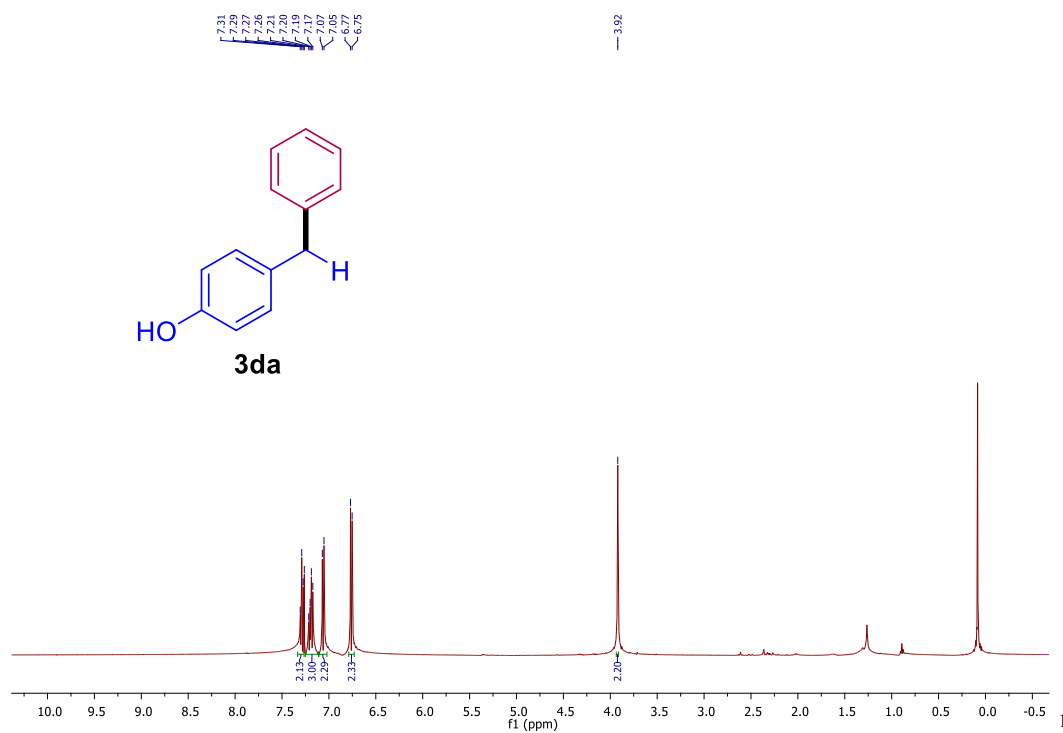

$^{13}\text{C}\{^1\text{H}\}$  NMR (126 MHz,  $\text{CDCl}_3$ , 24 °C)

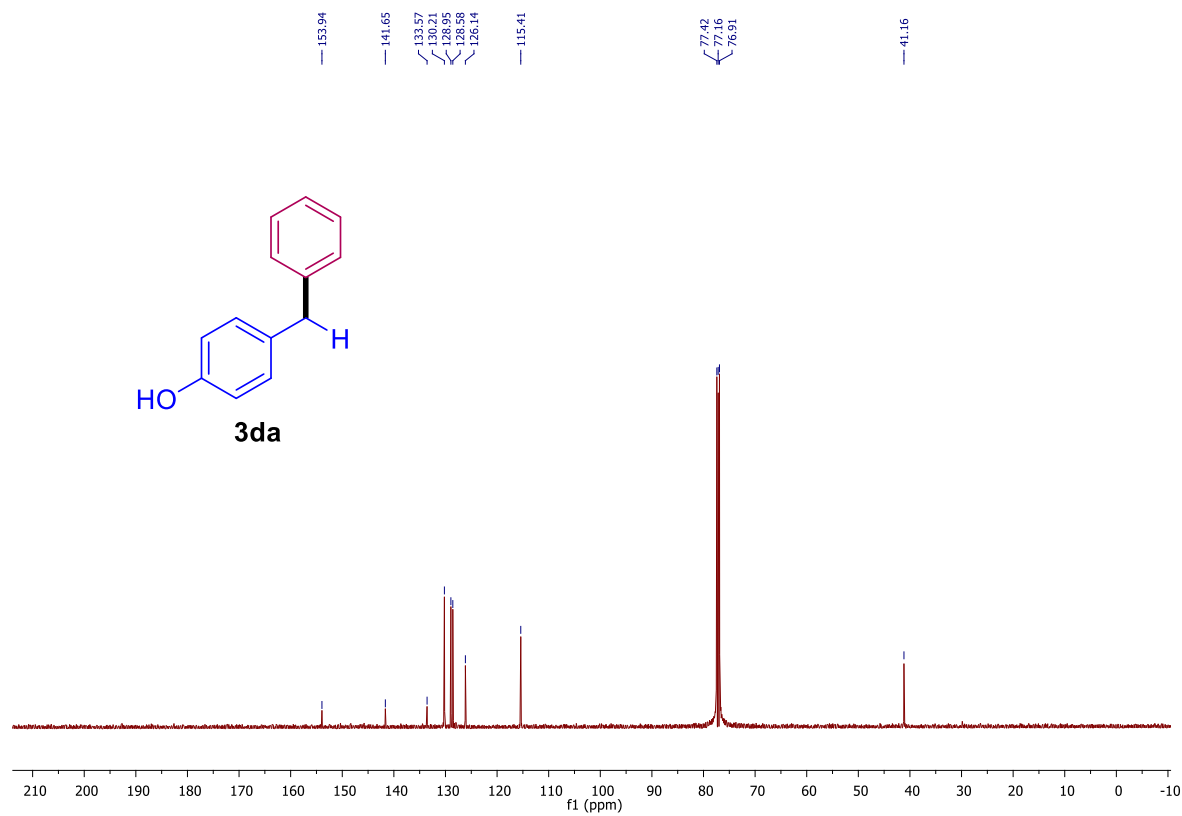

1-Chloro-4-(4-methoxybenzyl)benzene (**3eg**)

$^1\text{H}$  NMR (500 MHz,  $\text{CDCl}_3$ , 24 °C)

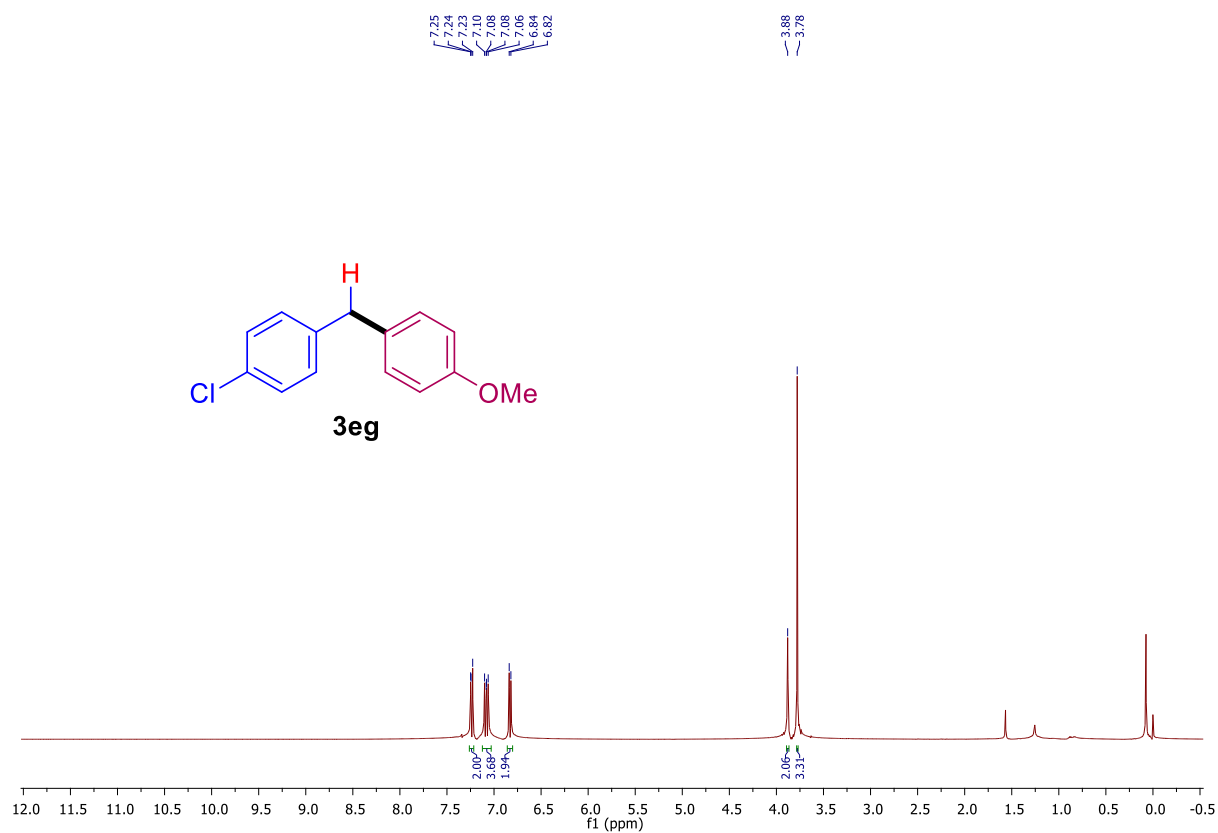

$^{13}\text{C}\{^1\text{H}\}$  NMR (126 MHz,  $\text{CDCl}_3$ , 24 °C)

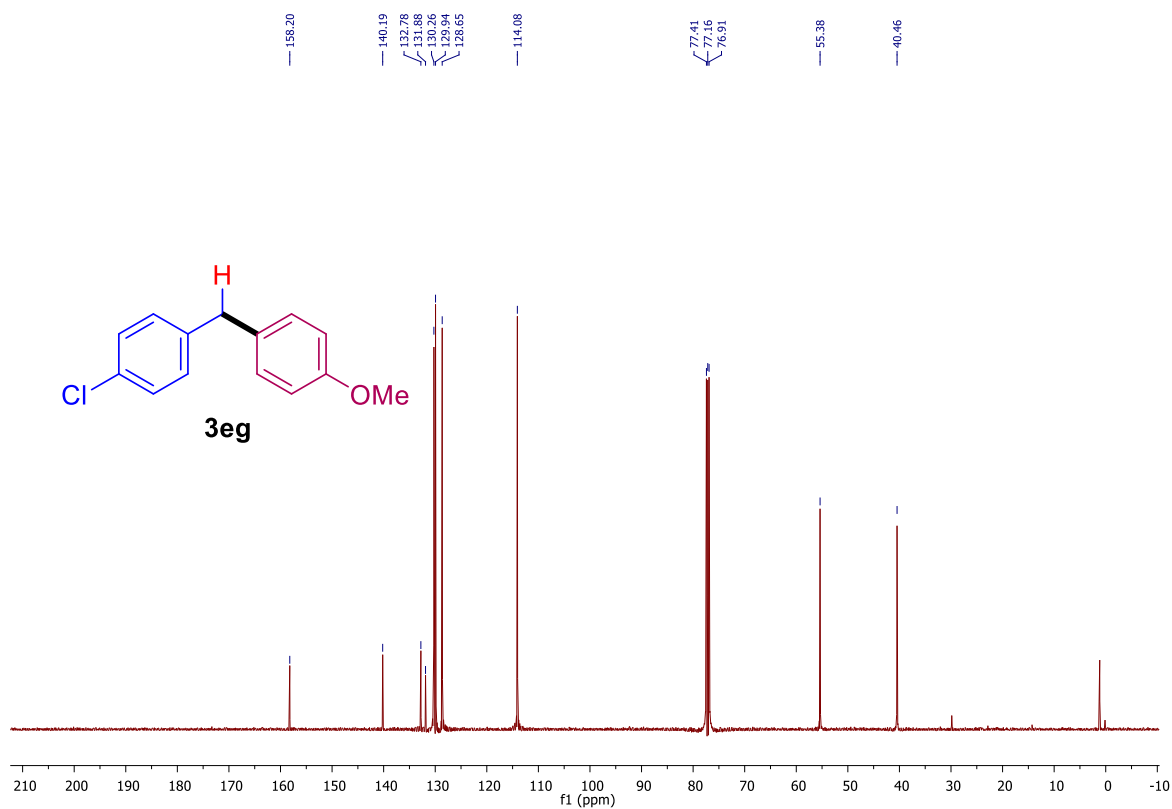

4-(4-Methoxybenzyl)pyridine (**3gg**)

$^1\text{H}$  NMR (500 MHz,  $\text{CDCl}_3$ , 24 °C)

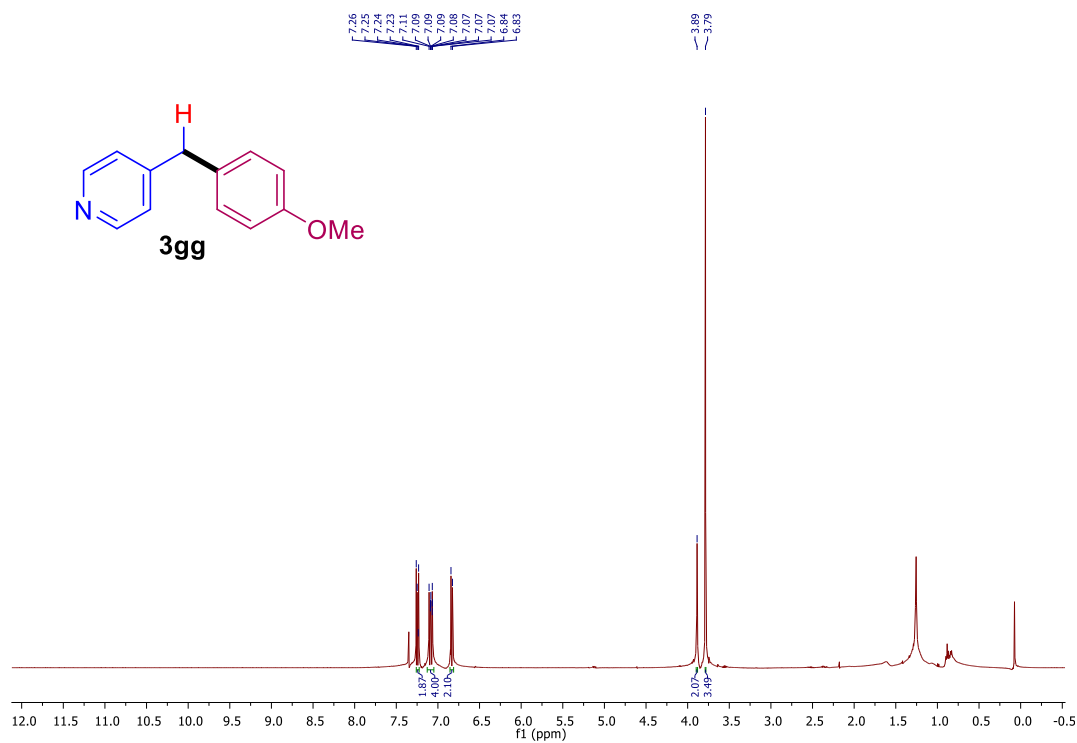

$^{13}\text{C}\{^1\text{H}\}$  NMR (126 MHz,  $\text{CDCl}_3$ , 24°C)

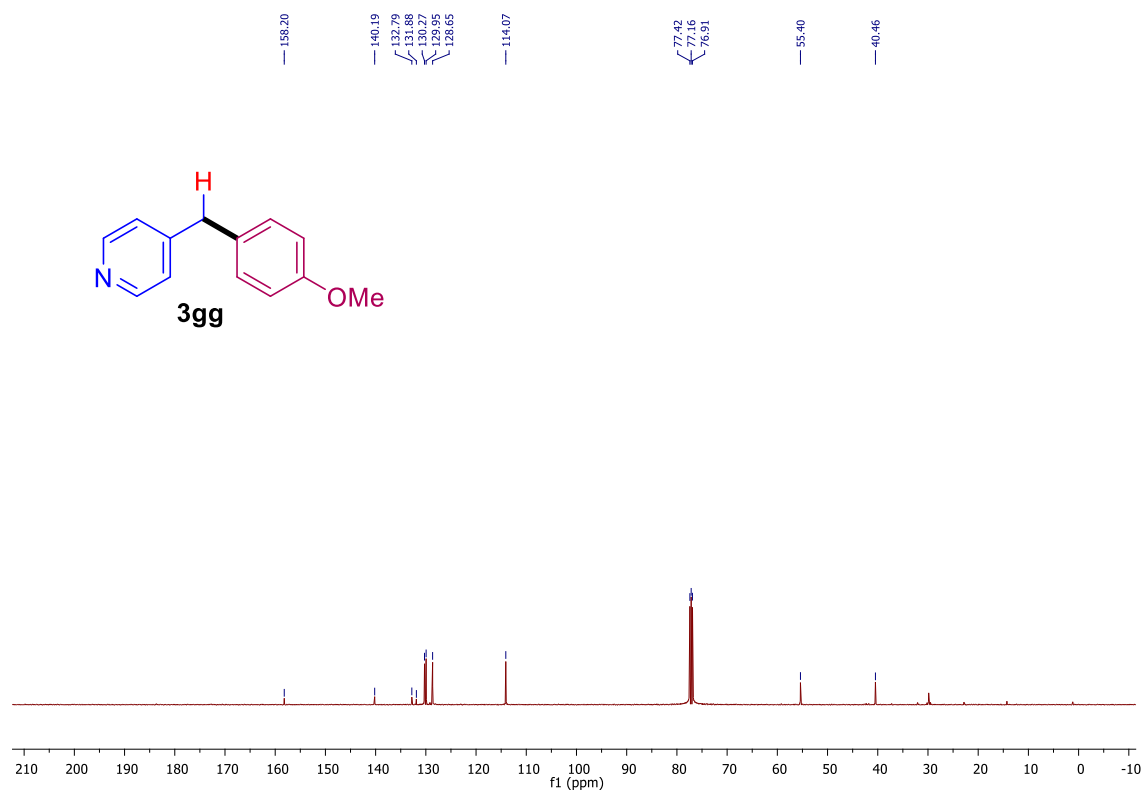

# 4-Benzylphenyl 2-(4-isobutylphenyl)propanoate (**3ha**)

$^1\text{H}$  NMR (500 MHz,  $\text{CDCl}_3$ , 24 °C)

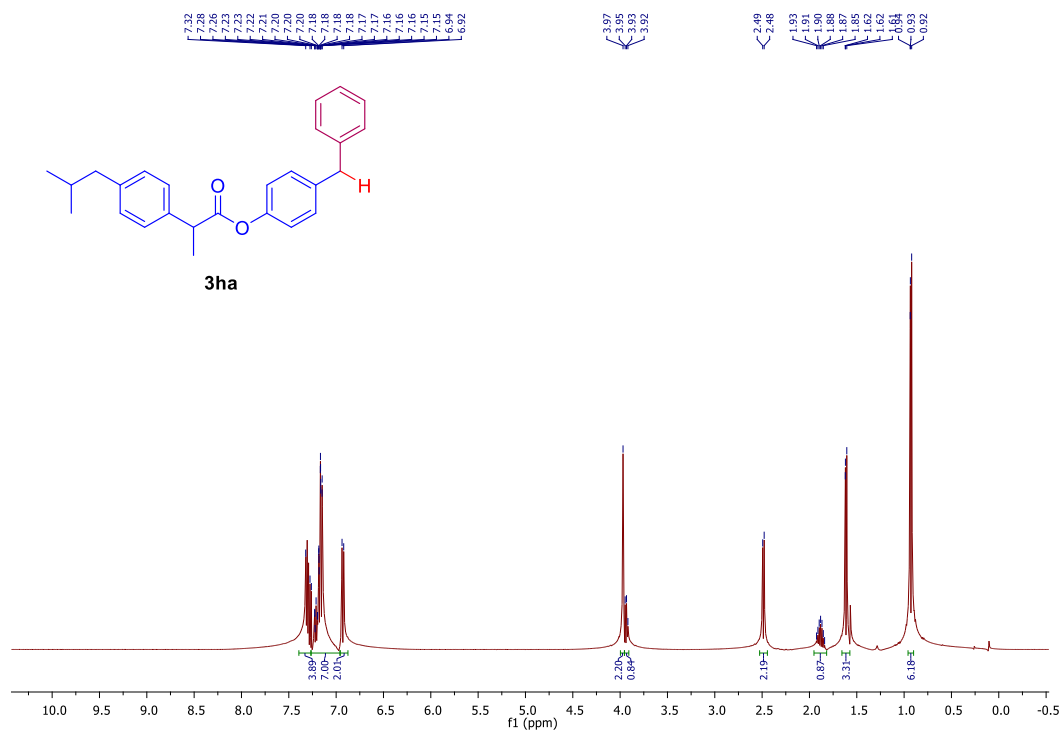

$^{13}\text{C}\{^1\text{H}\}$  NMR (126 MHz,  $\text{CDCl}_3$ , 24 °C)

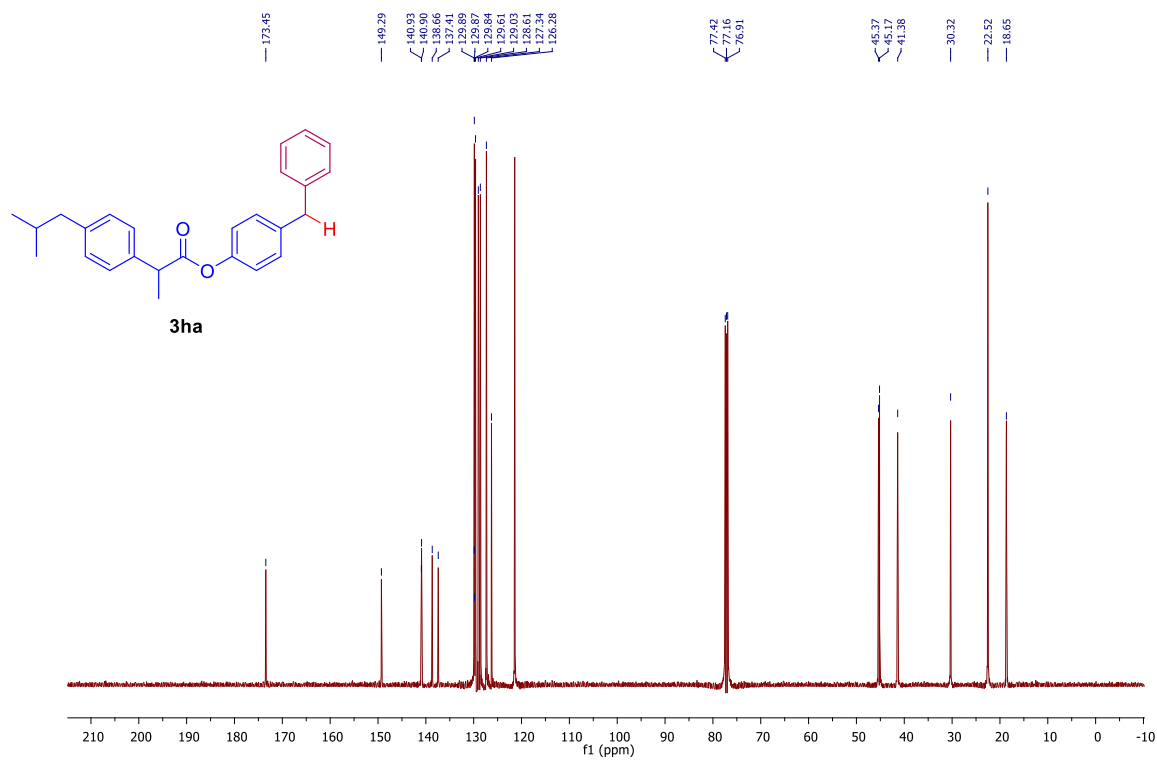



Methyl 4-(4-methoxybenzyl)benzoate (**3ac**)

$^1\text{H}$  NMR (500 MHz,  $\text{CDCl}_3$ , 24 °C)

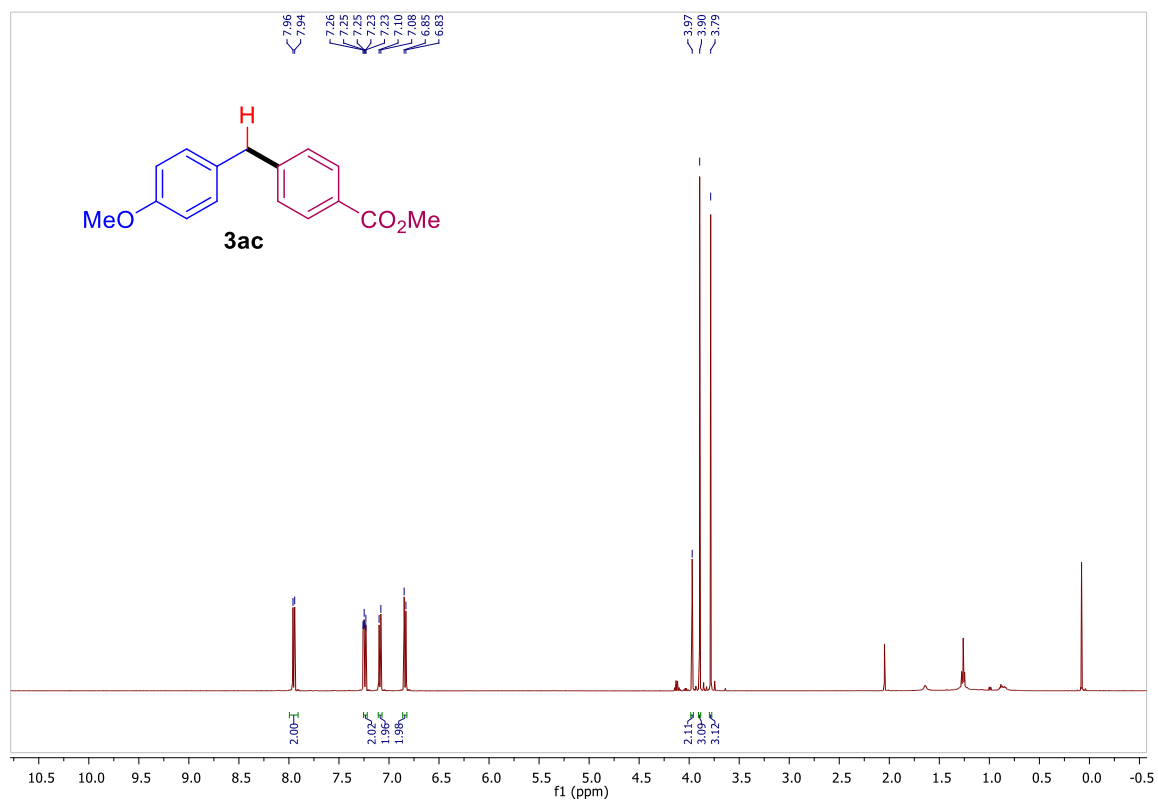

$^{13}\text{C}\{^1\text{H}\}$  NMR (126 MHz,  $\text{CDCl}_3$ , 24 °C)

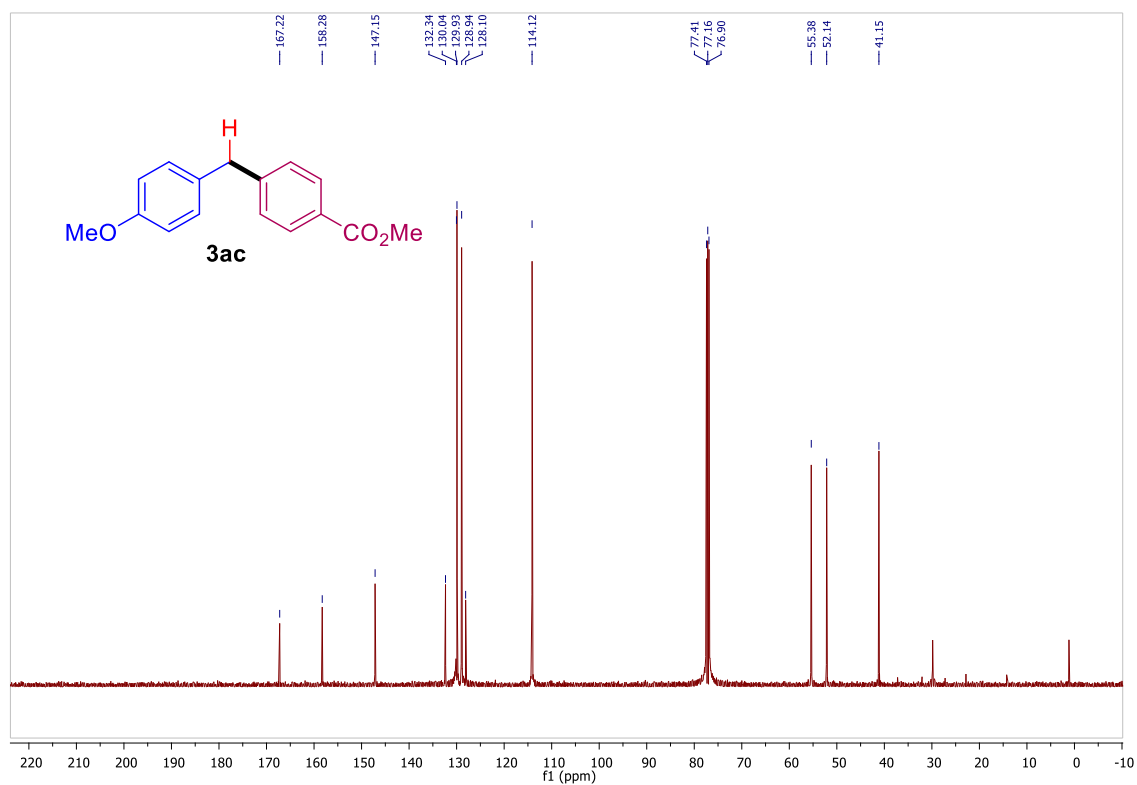

4-(4-Methoxybenzyl)-1,1'-biphenyl (**3ad**)

$^1\text{H}$  NMR (500 MHz,  $\text{CDCl}_3$ , 24 °C)

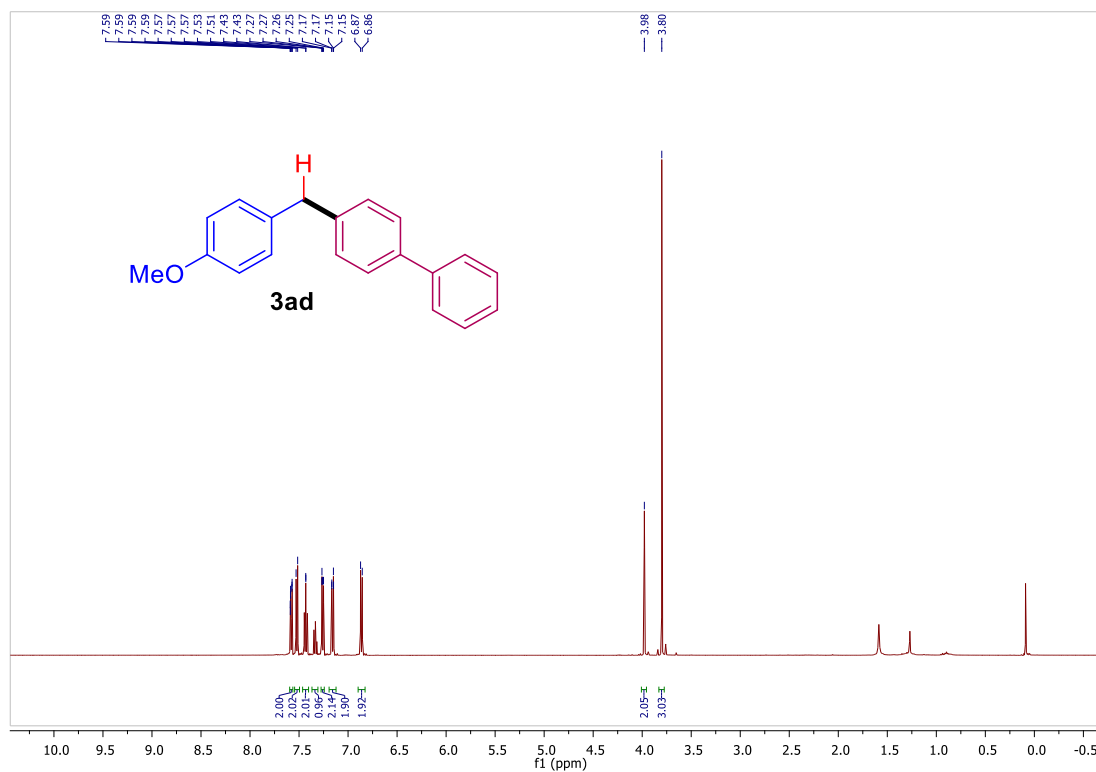

$^{13}\text{C}\{^1\text{H}\}$  NMR (126 MHz,  $\text{CDCl}_3$ , 24 °C)

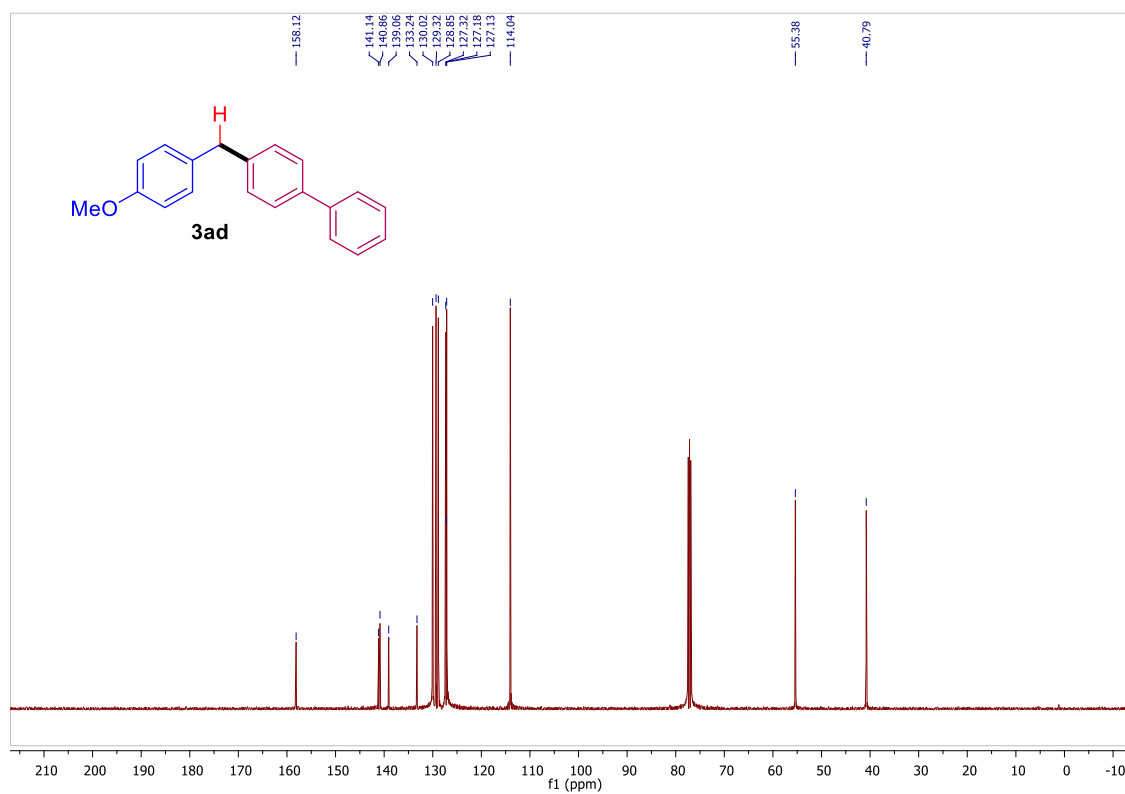

4-(4-methoxybenzyl)benzaldehyde (**3ae**)

$^1\text{H}$  NMR (500 MHz,  $\text{CDCl}_3$ , 24 °C)

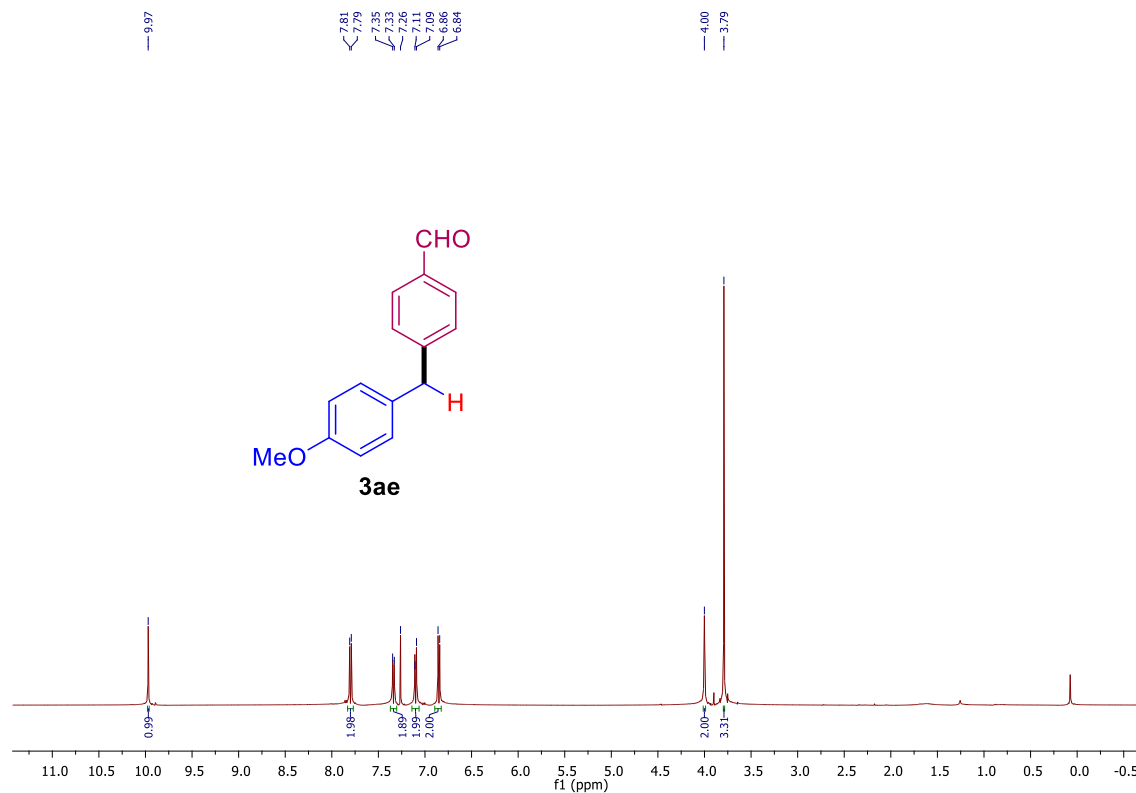

$^{13}\text{C}\{^1\text{H}\}$  NMR (126 MHz,  $\text{CDCl}_3$ , 24 °C)

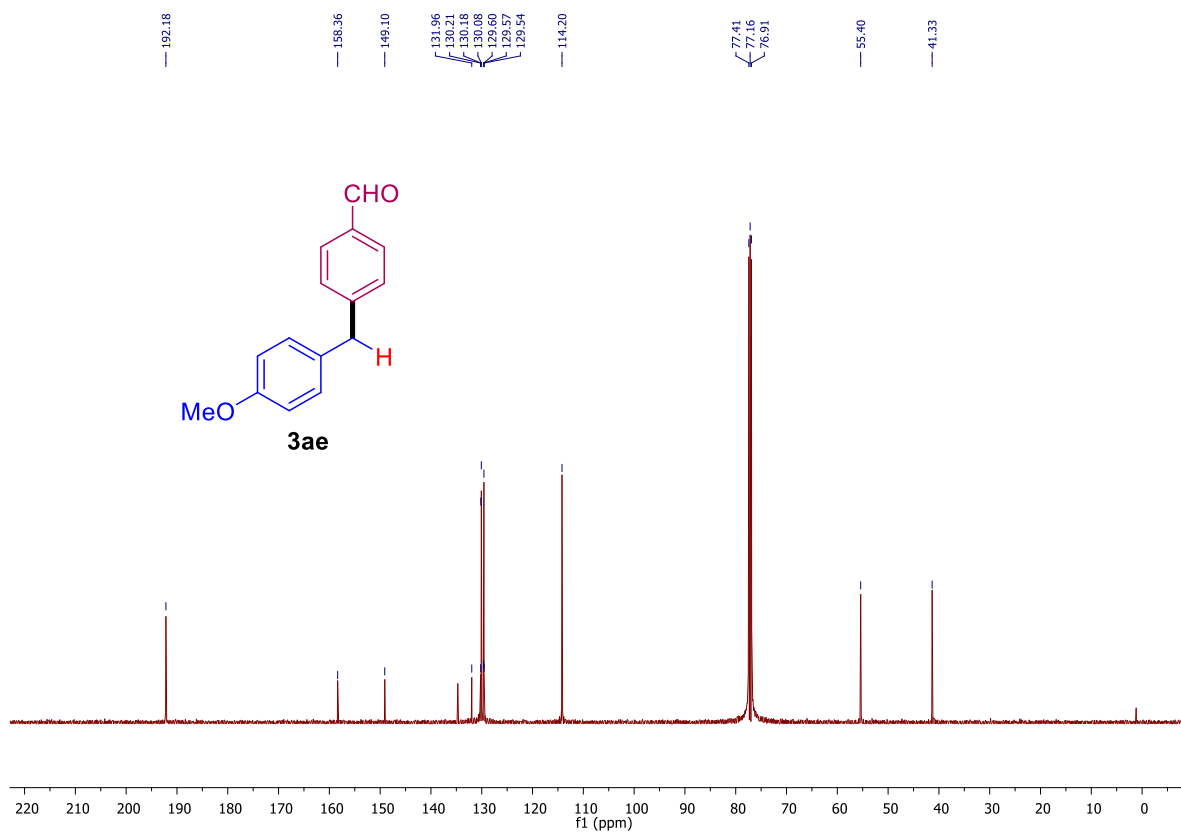

4-(4-Methoxybenzyl) benzonitrile (**3af**)

$^1\text{H}$  NMR (500 MHz,  $\text{CDCl}_3$ , 24 °C)

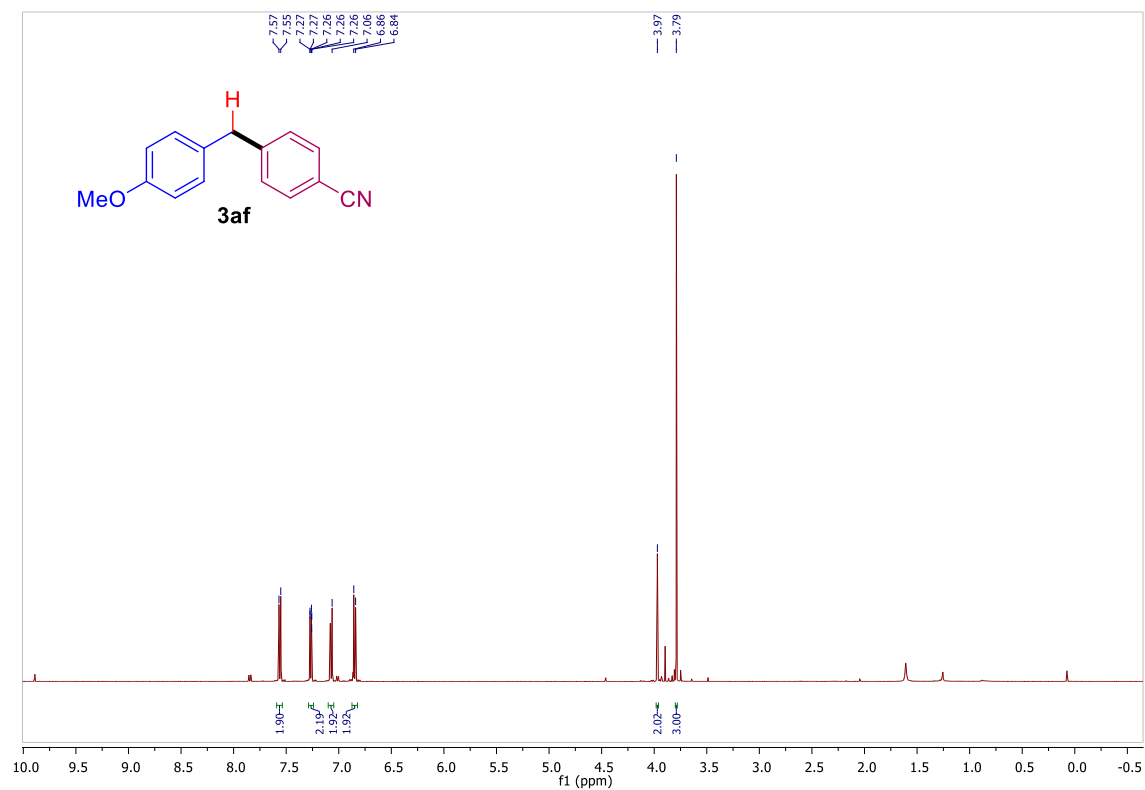

$^{13}\text{C}\{^1\text{H}\}$  NMR (126 MHz,  $\text{CDCl}_3$ , 24°C)

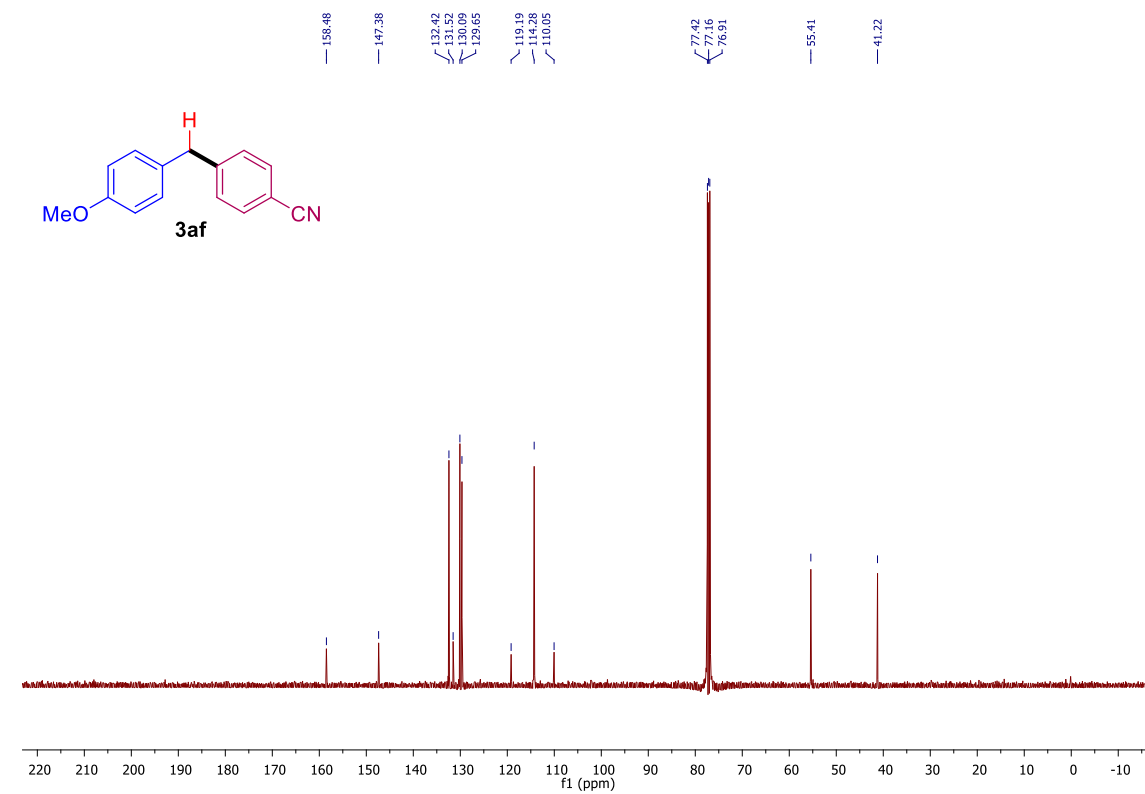

Bis(4-methoxyphenyl) methane (**3ag**)

$^1\text{H}$  NMR (500 MHz,  $\text{CDCl}_3$ , 24 °C)

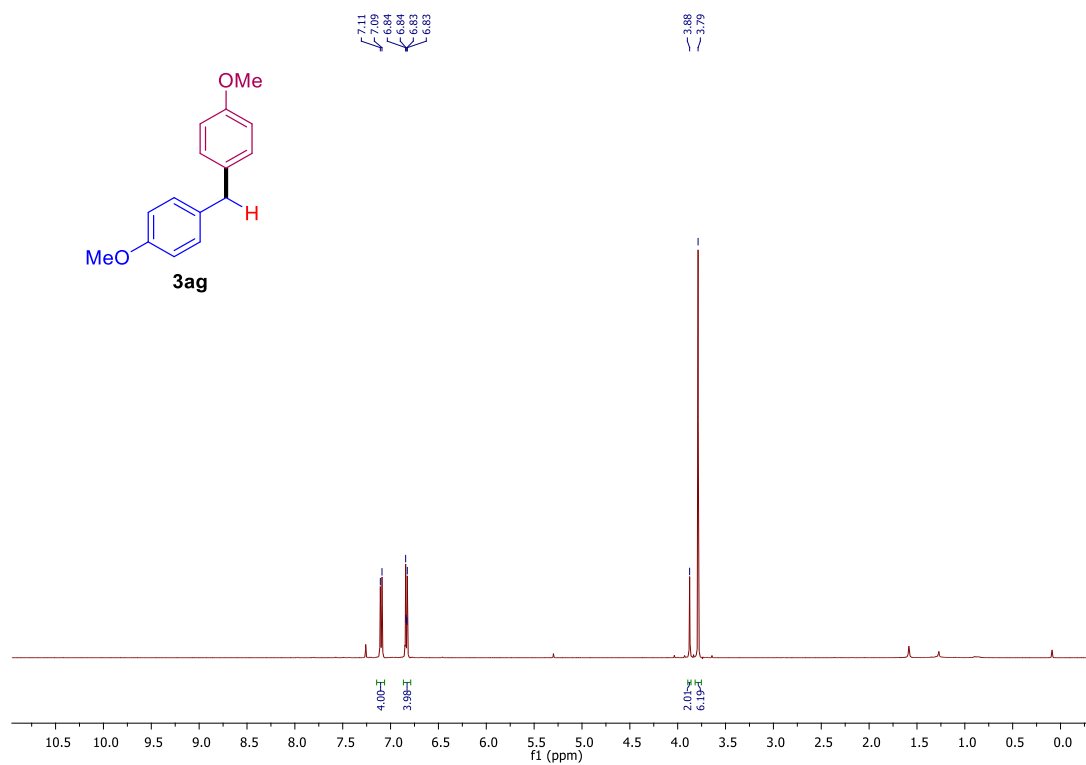

$^{13}\text{C}\{^1\text{H}\}$  NMR (126 MHz,  $\text{CDCl}_3$ , 24 °C)

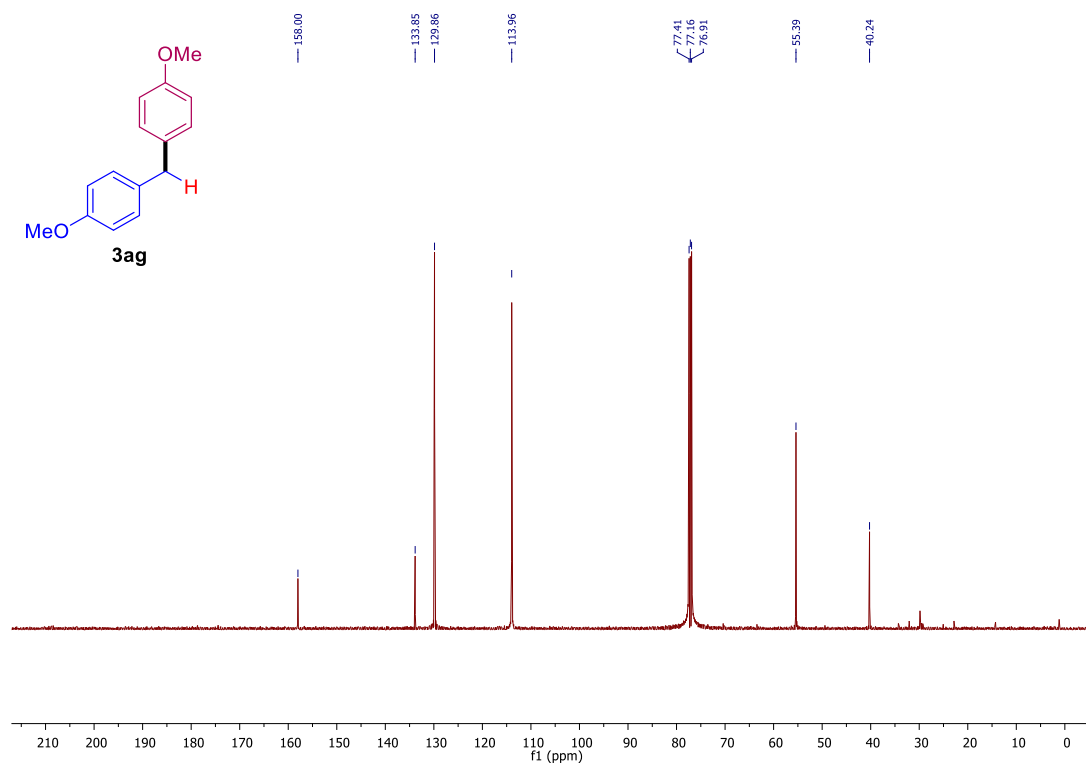

1-Chloro-3-(4-methoxybenzyl) benzene (**3ah**)

$^1\text{H}$  NMR (500 MHz,  $\text{CDCl}_3$ , 24 °C)

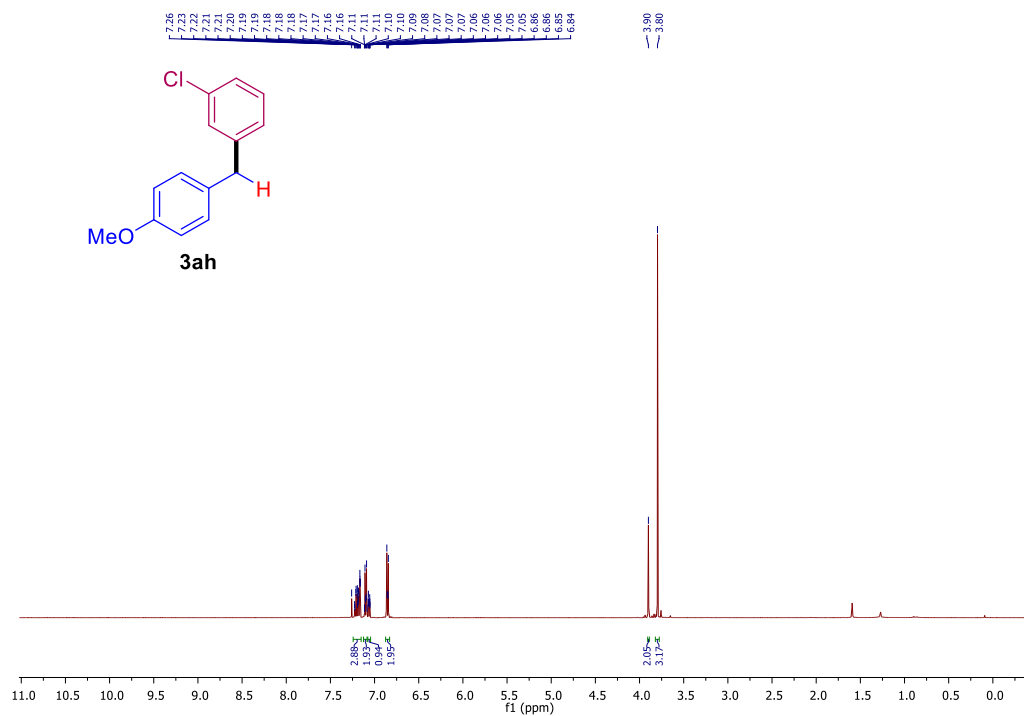

$^{13}\text{C}\{^1\text{H}\}$  NMR (126 MHz,  $\text{CDCl}_3$ , 24 °C)

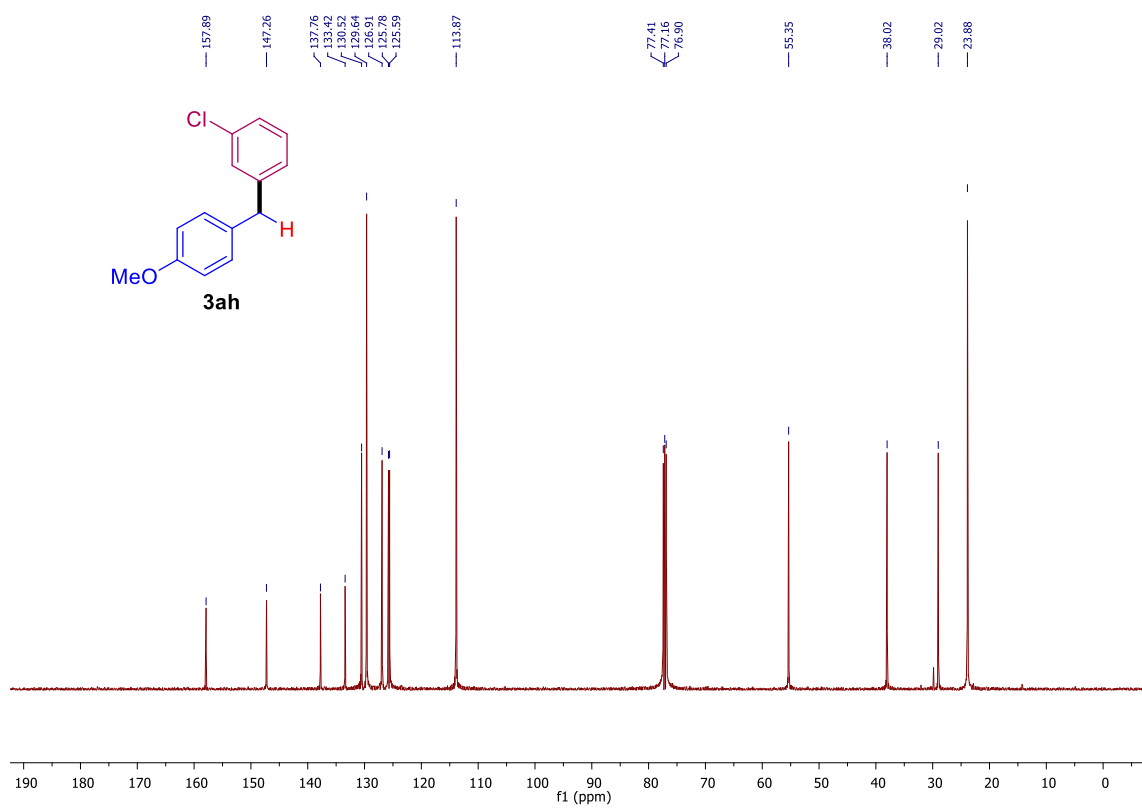

2-(4-Methoxybenzyl)-1,3-dimethylbenzene (**3ai**)

$^1\text{H}$  NMR (500 MHz,  $\text{CDCl}_3$ , 24 °C)

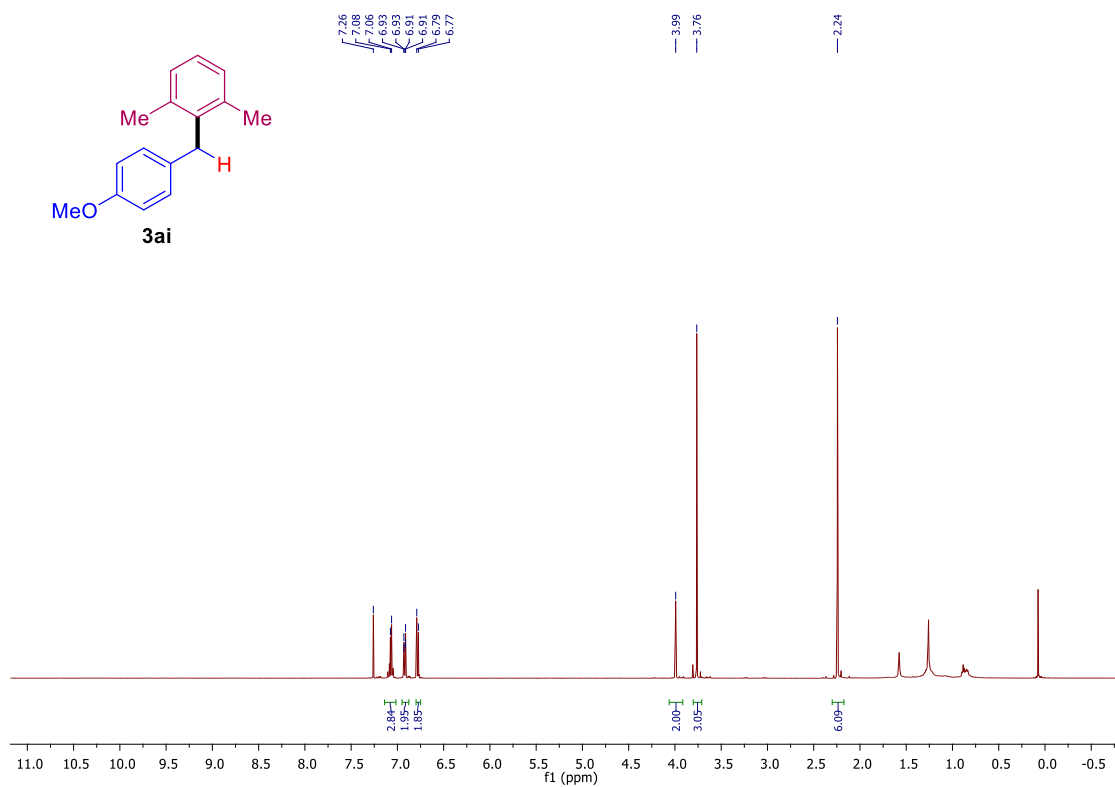

$^{13}\text{C}\{^1\text{H}\}$  NMR (126 MHz,  $\text{CDCl}_3$ , 24 °C)

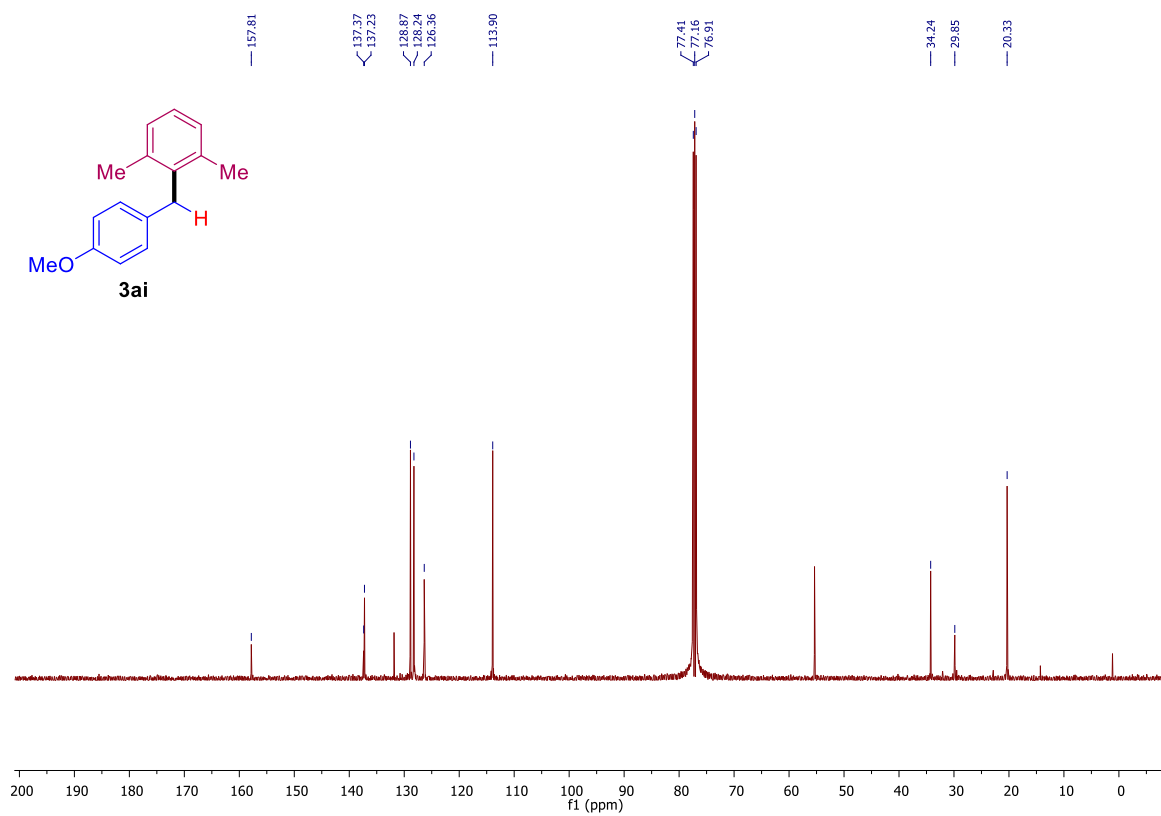

1,4-Dimethoxy-2-(4-methoxybenzyl) benzene (**3aj**)

$^1\text{H}$  NMR (500 MHz,  $\text{CDCl}_3$ , 24 °C)

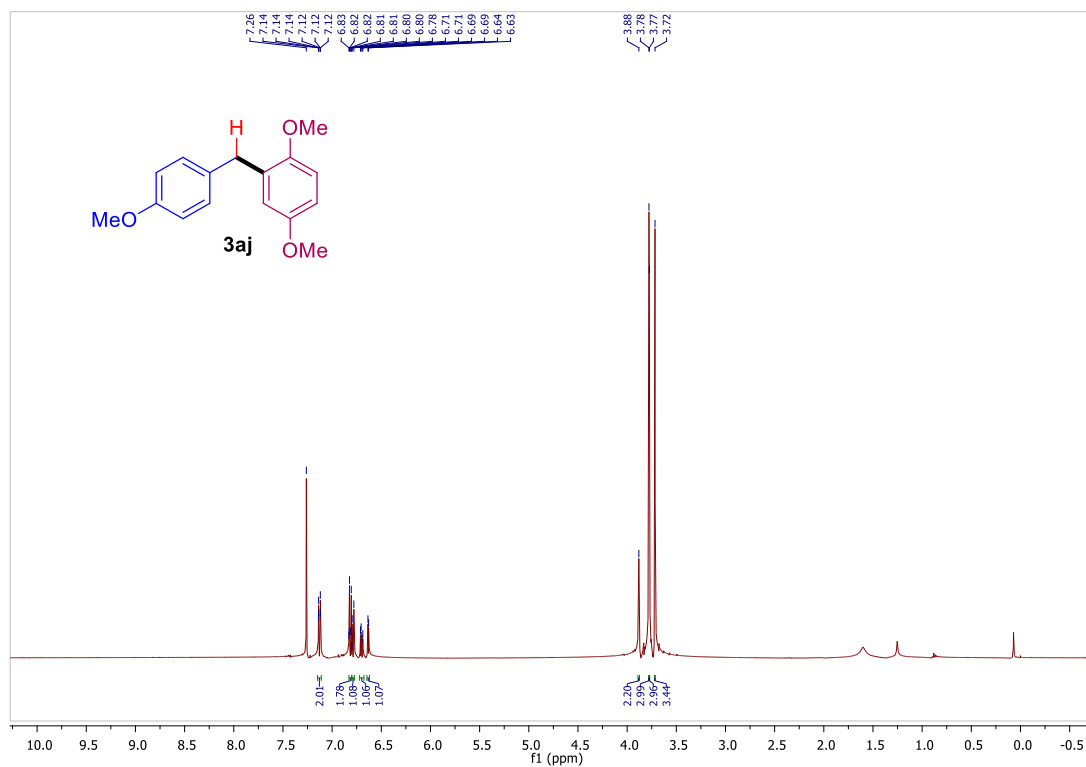

$^{13}\text{C}\{^1\text{H}\}$  NMR (126 MHz,  $\text{CDCl}_3$ , 24 °C)

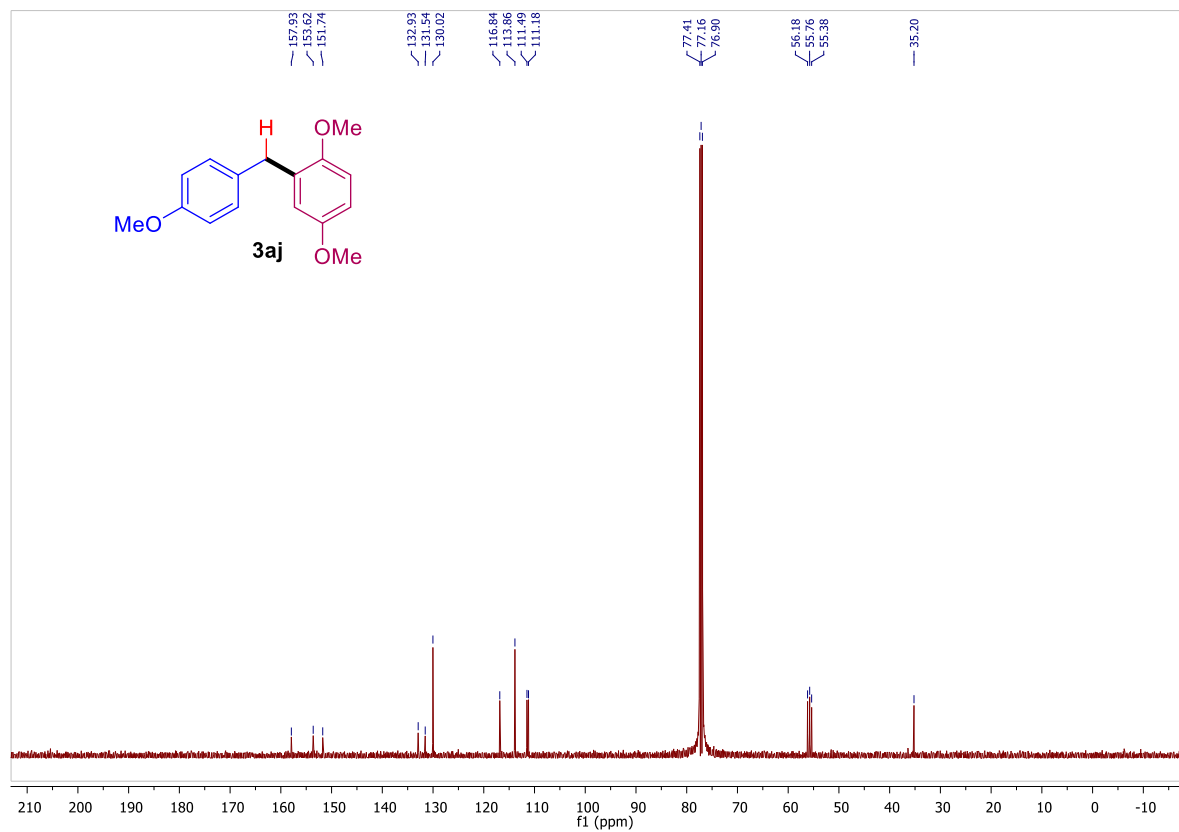



2-Fluoro-1-methoxy-3-(4-methoxybenzyl) benzene (**3al**)

$^1\text{H}$  NMR (500 MHz,  $\text{CDCl}_3$ , 24 °C)

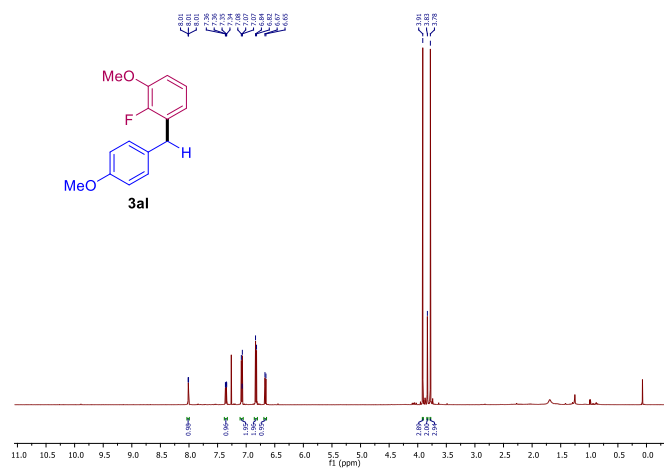

$^{13}\text{C}\{^1\text{H}\}$  NMR (126 MHz,  $\text{CDCl}_3$ , 24 °C)

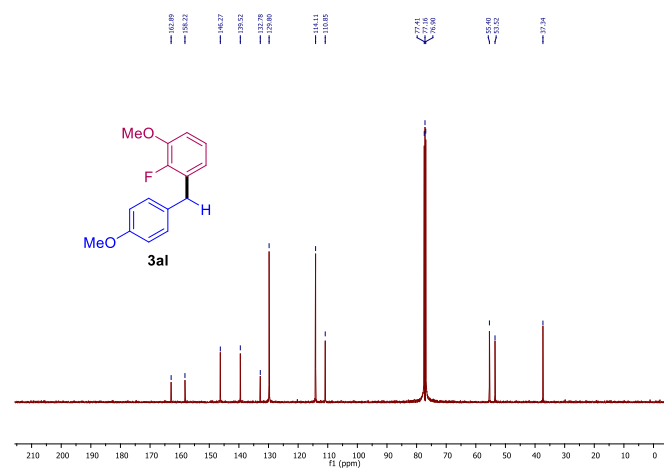

$^{19}\text{F}$  NMR (471 MHz,  $\text{CDCl}_3$ , 24 °C)

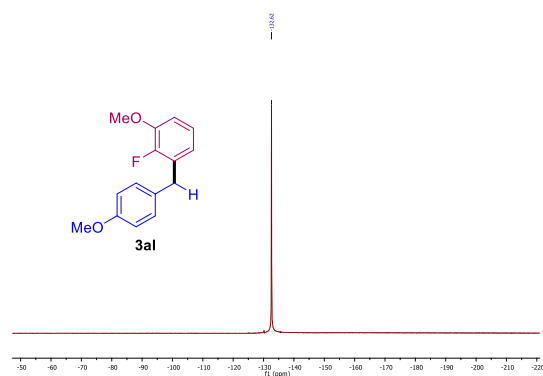

1-Chloro-2-(4-methoxybenzyl)benzene (**3am**)

$^1\text{H}$  NMR (500 MHz,  $\text{CDCl}_3$ , 24 °C)

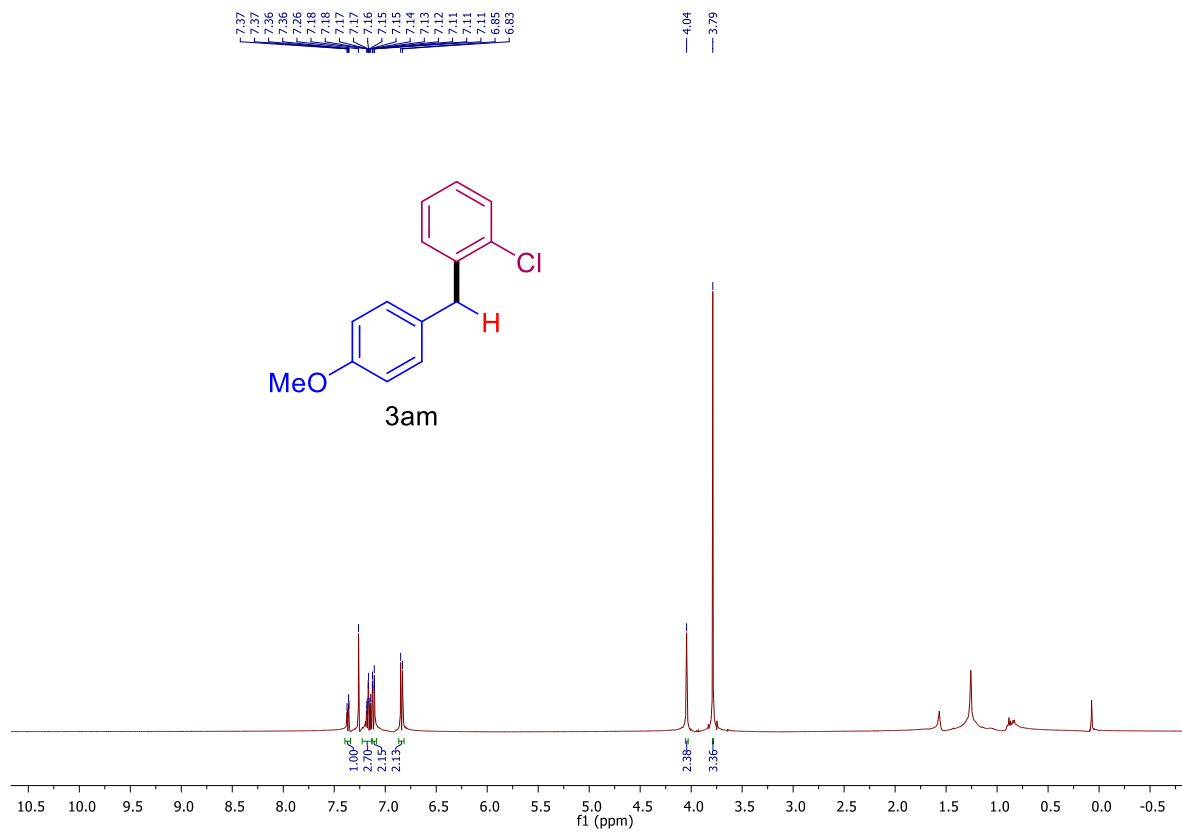

$^{13}\text{C}\{^1\text{H}\}$  NMR (126 MHz,  $\text{CDCl}_3$ , 24 °C)

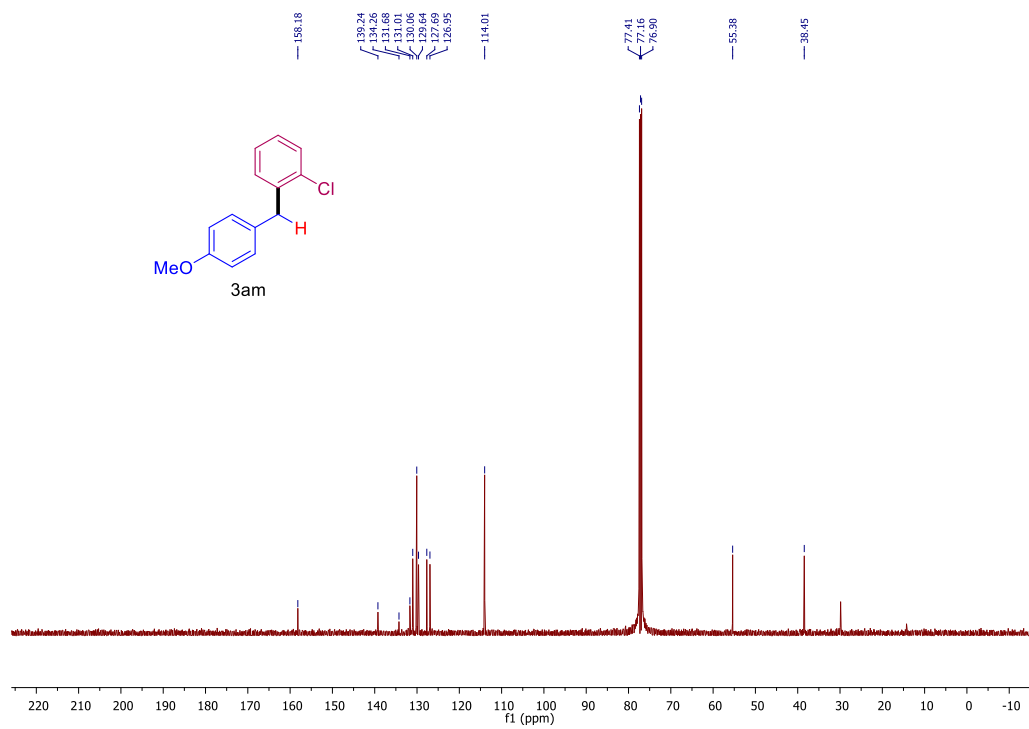

1-Isopropyl-2-(4-methoxybenzyl)benzene (**3an**)

$^1\text{H}$  NMR (500 MHz,  $\text{CDCl}_3$ , 24 °C)

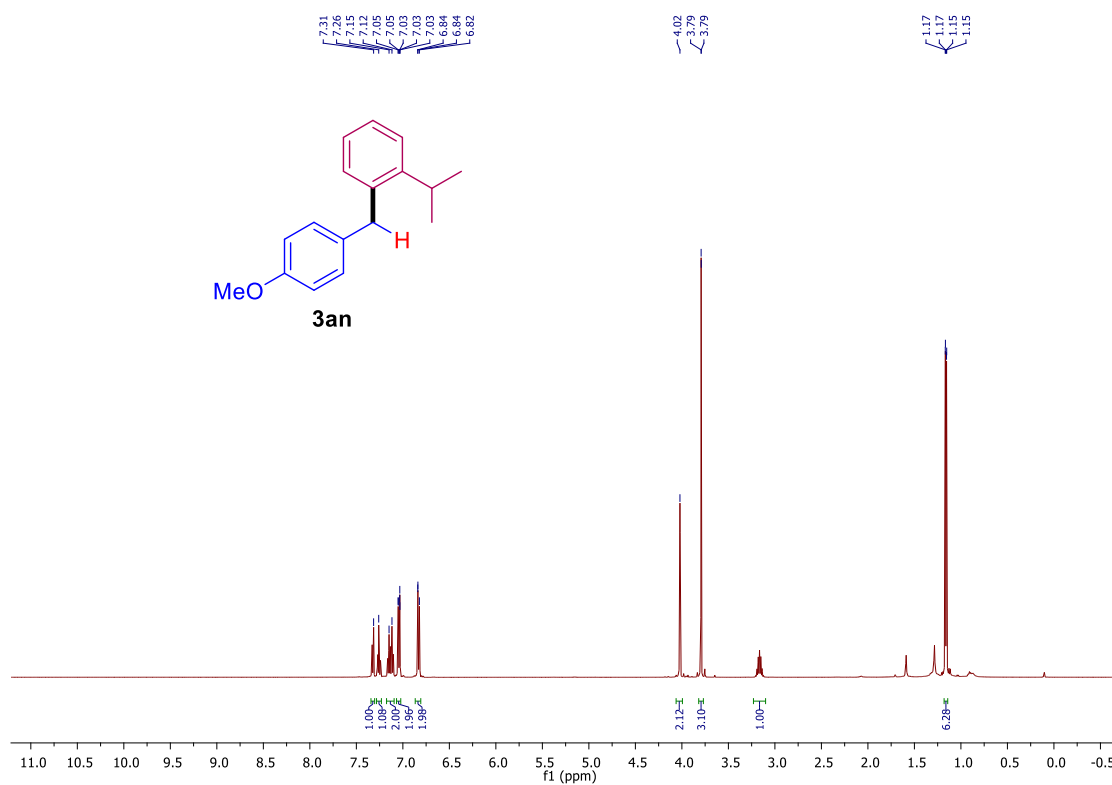

$^{13}\text{C}\{^1\text{H}\}$  NMR (126 MHz,  $\text{CDCl}_3$ , 24 °C)

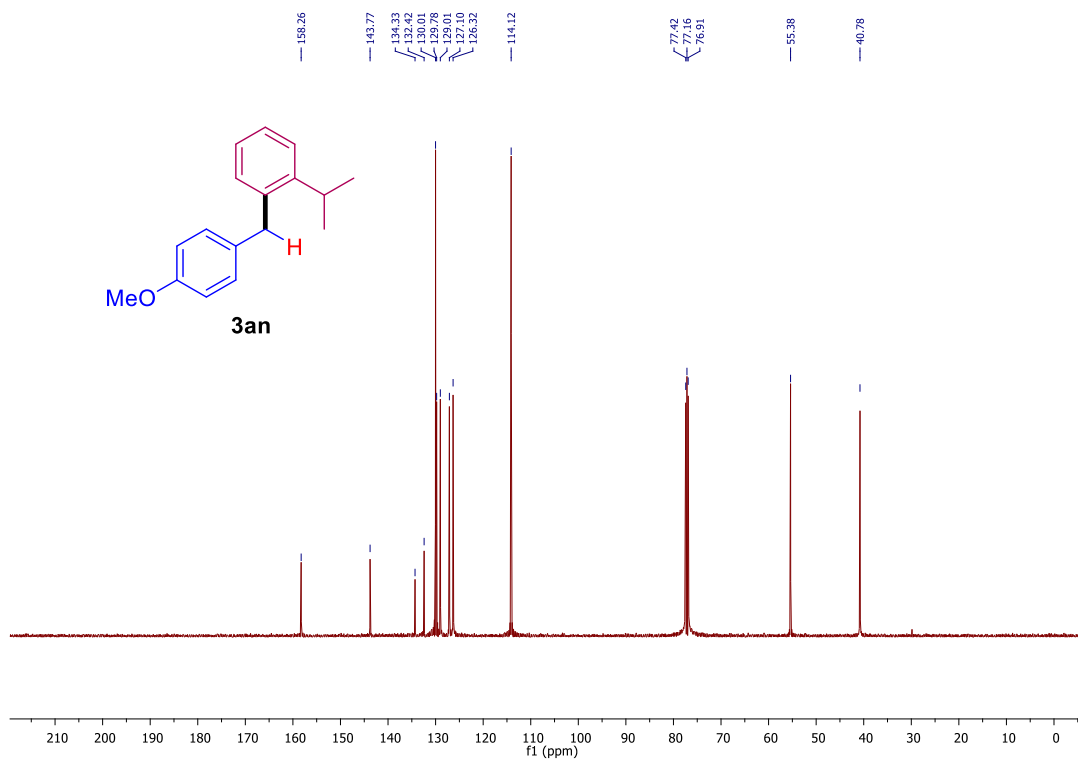

# 2-(4-Methoxybenzyl) naphthalene (**3ao**)

$^1\text{H}$  NMR (500 MHz,  $\text{CDCl}_3$ , 24 °C)

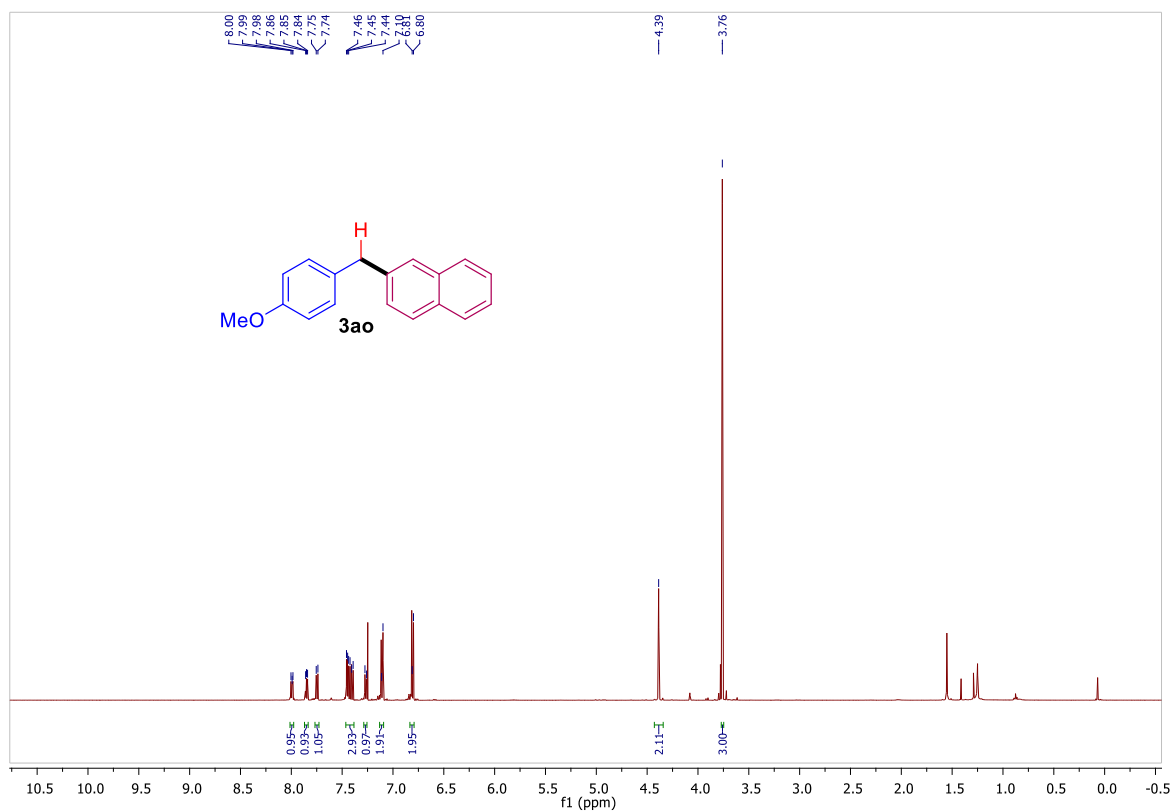

$^{13}\text{C}\{^1\text{H}\}$  NMR (126 MHz,  $\text{CDCl}_3$ , 24 °C)

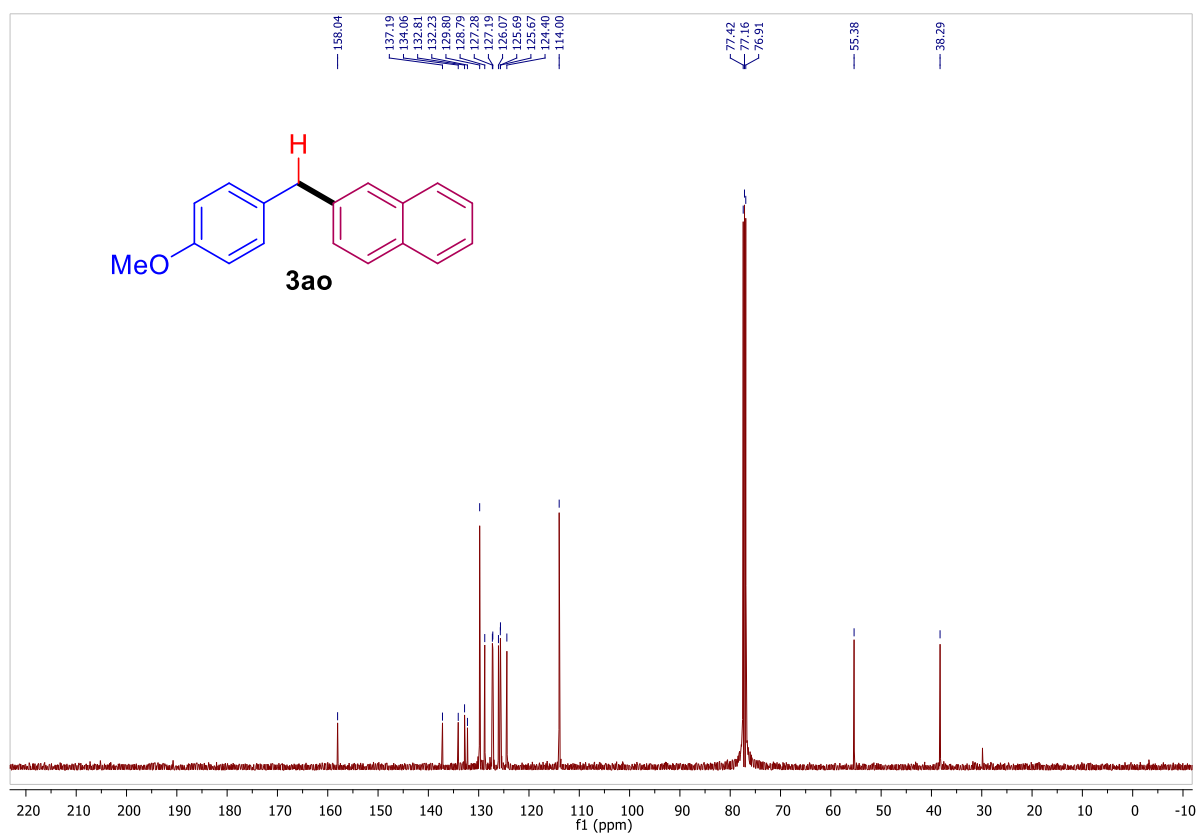

*N,N*-Dimethyl-4-(3-phenylpropyl)aniline (**3bp**)

$^1\text{H}$  NMR (500 MHz,  $\text{CDCl}_3$ , 24 °C)

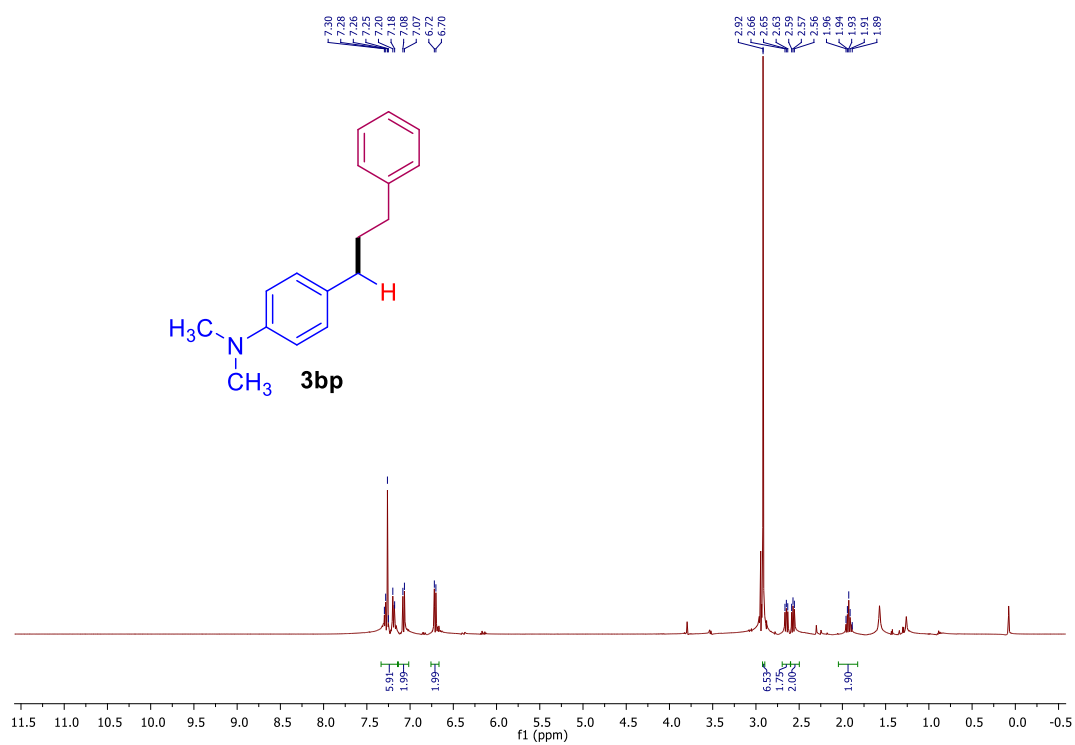

$^{13}\text{C}\{^1\text{H}\}$  NMR (126 MHz,  $\text{CDCl}_3$ , 24 °C)

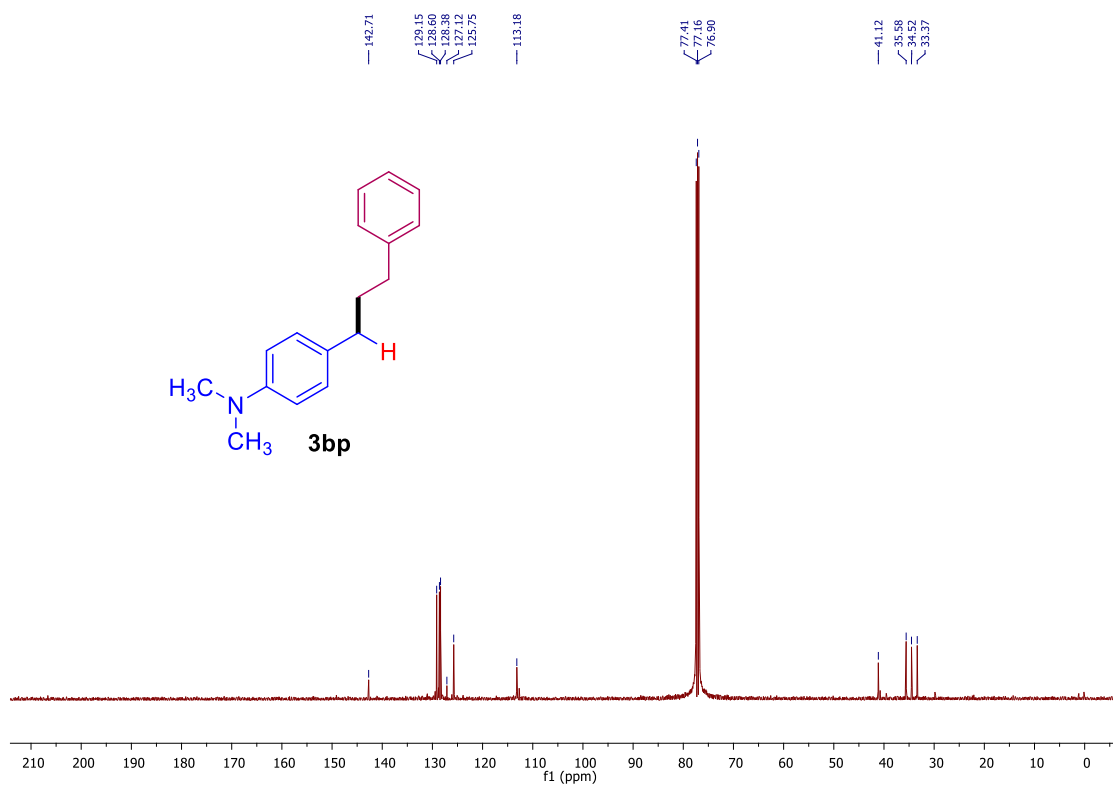

Ethane-1,1-diylidibenzene (**5aa**)

$^1\text{H}$  NMR (500 MHz,  $\text{CDCl}_3$ , 24 °C)

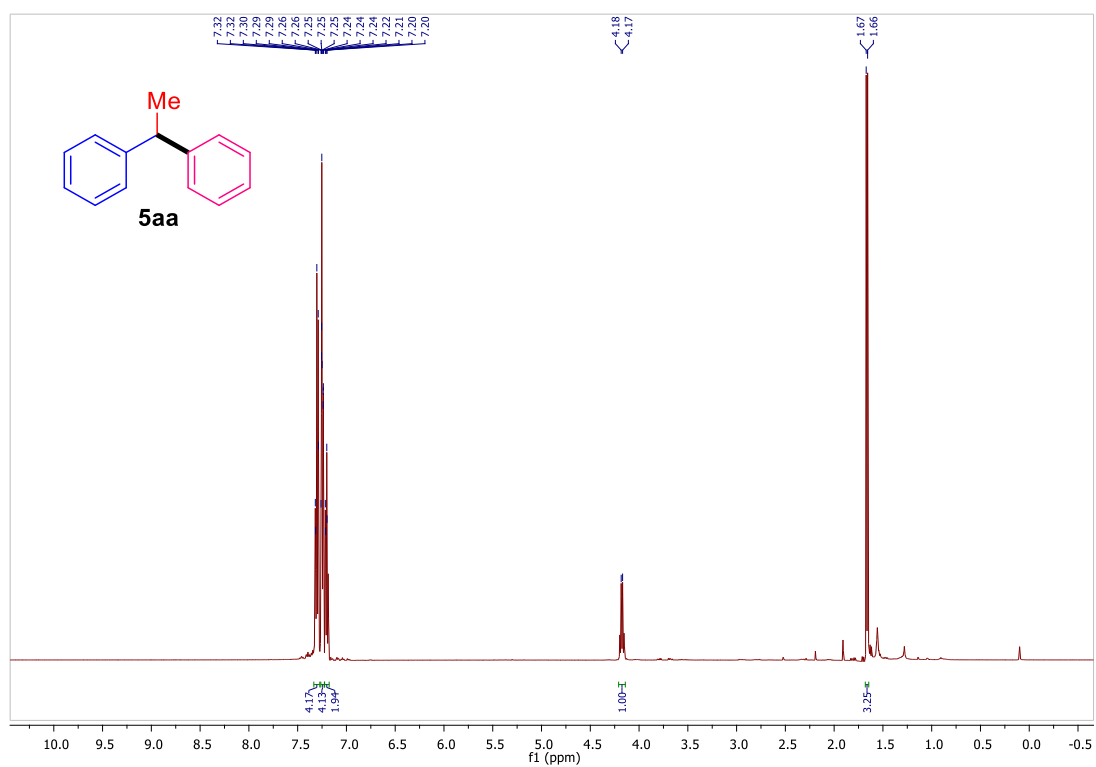

$^{13}\text{C}\{^1\text{H}\}$  NMR (126 MHz,  $\text{CDCl}_3$ , 24 °C)

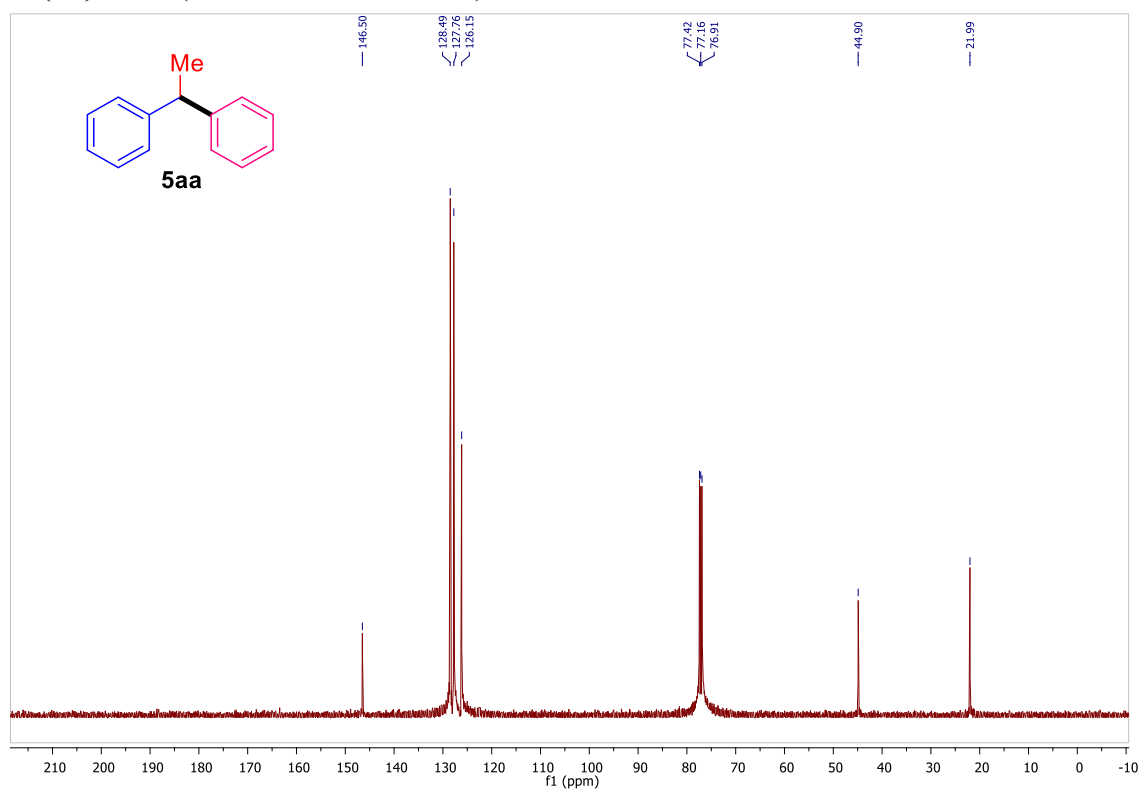

(S)-1-Methoxy-4-(1-(4-(trifluoromethyl) phenyl) ethyl) benzene (**5bb**)

$^1\text{H}$  NMR (500 MHz,  $\text{CDCl}_3$ , 24 °C)

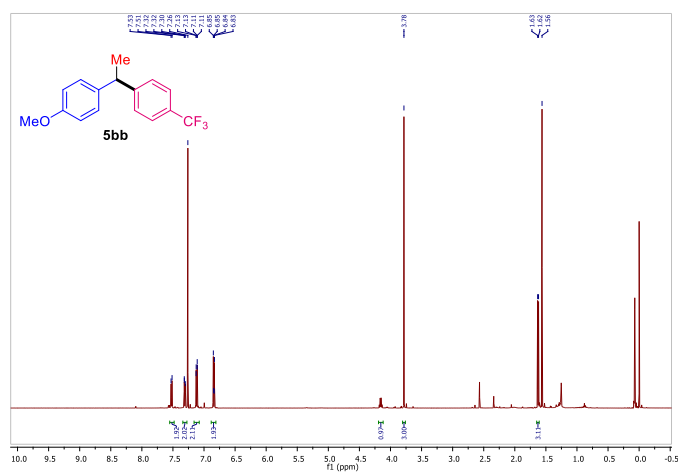

$^{13}\text{C}\{^1\text{H}\}$  NMR (126 MHz,  $\text{CDCl}_3$ , 24 °C)

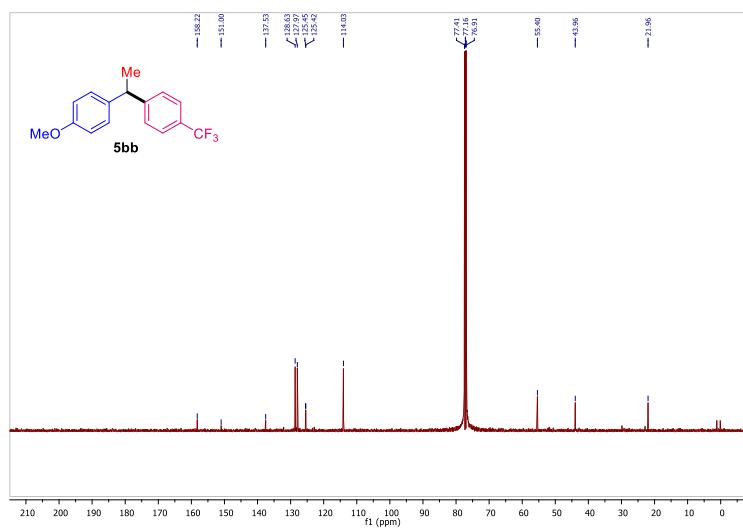

$^{19}\text{F}$  NMR (471 MHz,  $\text{CDCl}_3$ , 24 °C)

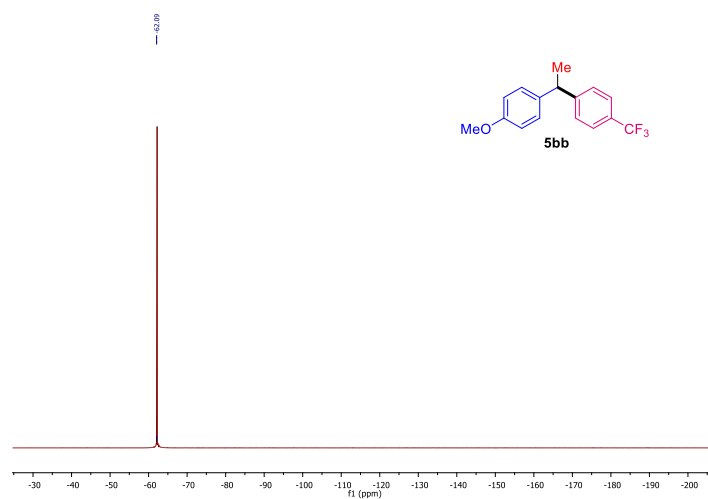

Methyl (S)-4-(1-(4-methoxyphenyl)ethyl)benzoate (**5bc**)

$^1\text{H}$  NMR (500 MHz,  $\text{CDCl}_3$ , 24 °C)

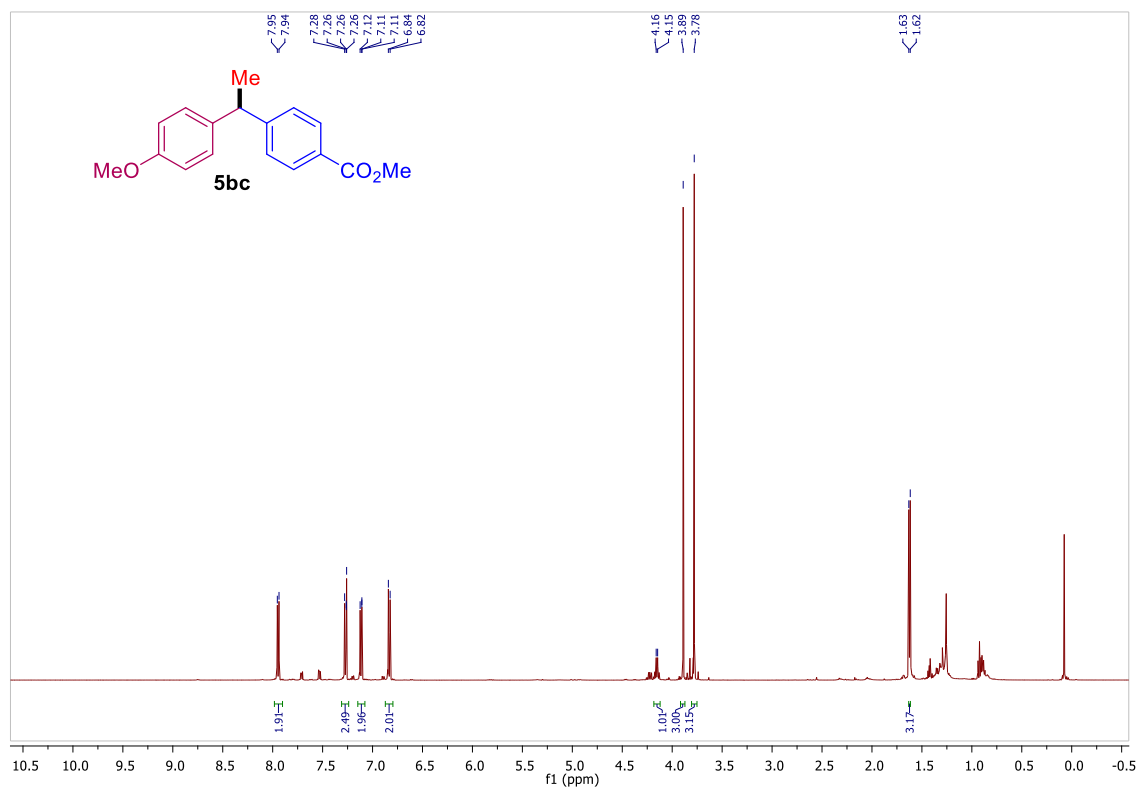

$^{13}\text{C}$  { $^1\text{H}$ } NMR (500 MHz,  $\text{CDCl}_3$ , 24 °C)

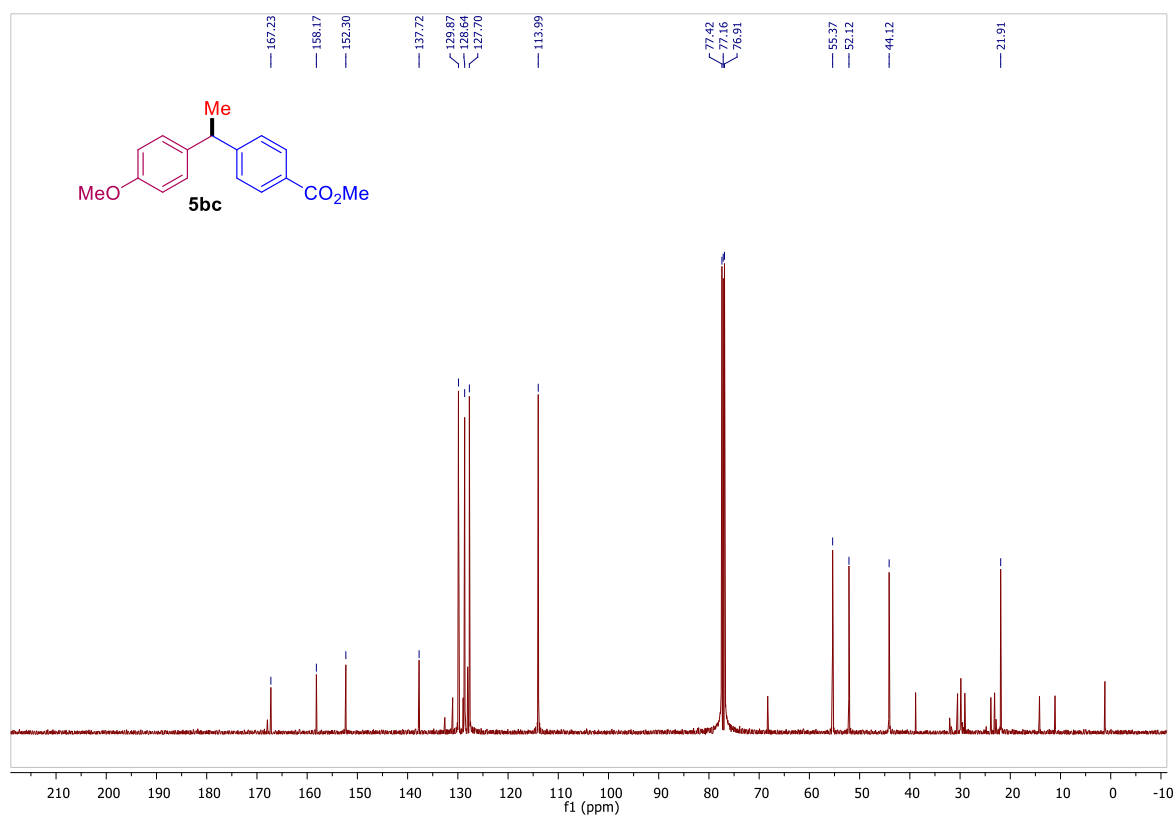

4,4'-(Ethane-1,1-diyl) bis(methoxybenzene) (**5bg**)

$^1\text{H}$  NMR (500 MHz,  $\text{CDCl}_3$ , 24 °C)

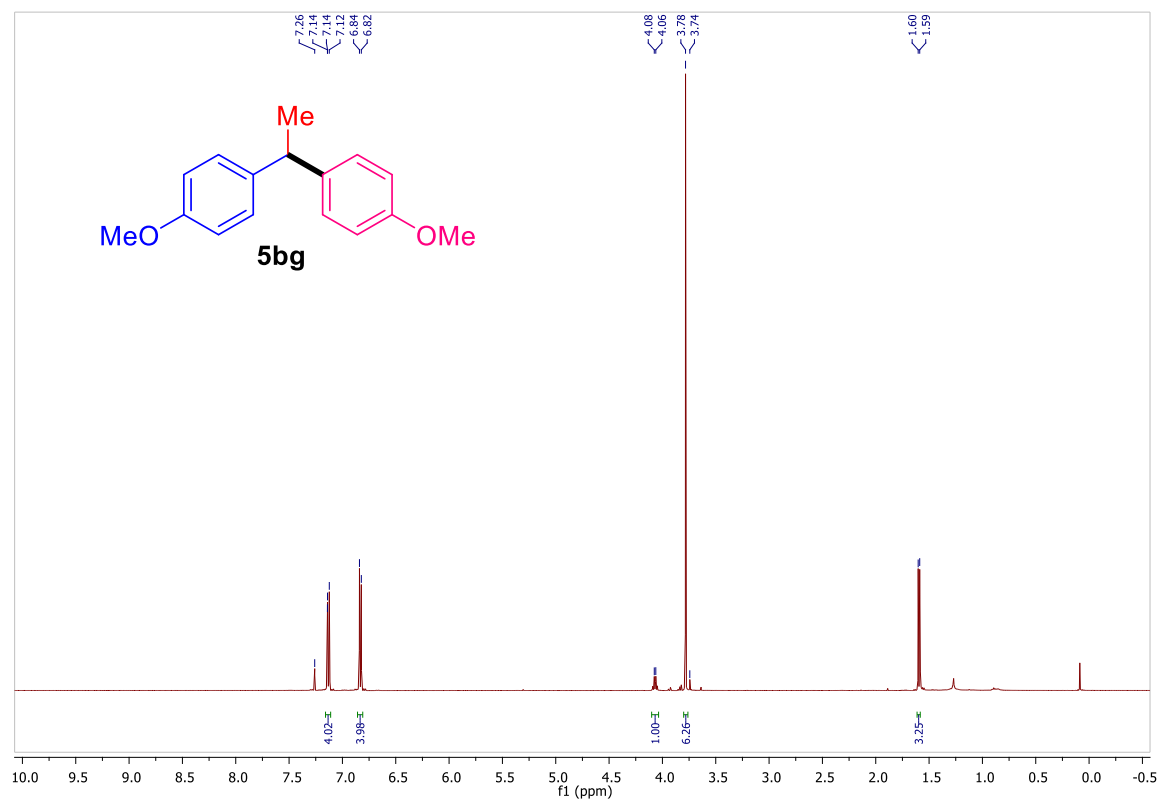

$^{13}\text{C}$  { $^1\text{H}$ } NMR (500 MHz,  $\text{CDCl}_3$ , 24 °C)

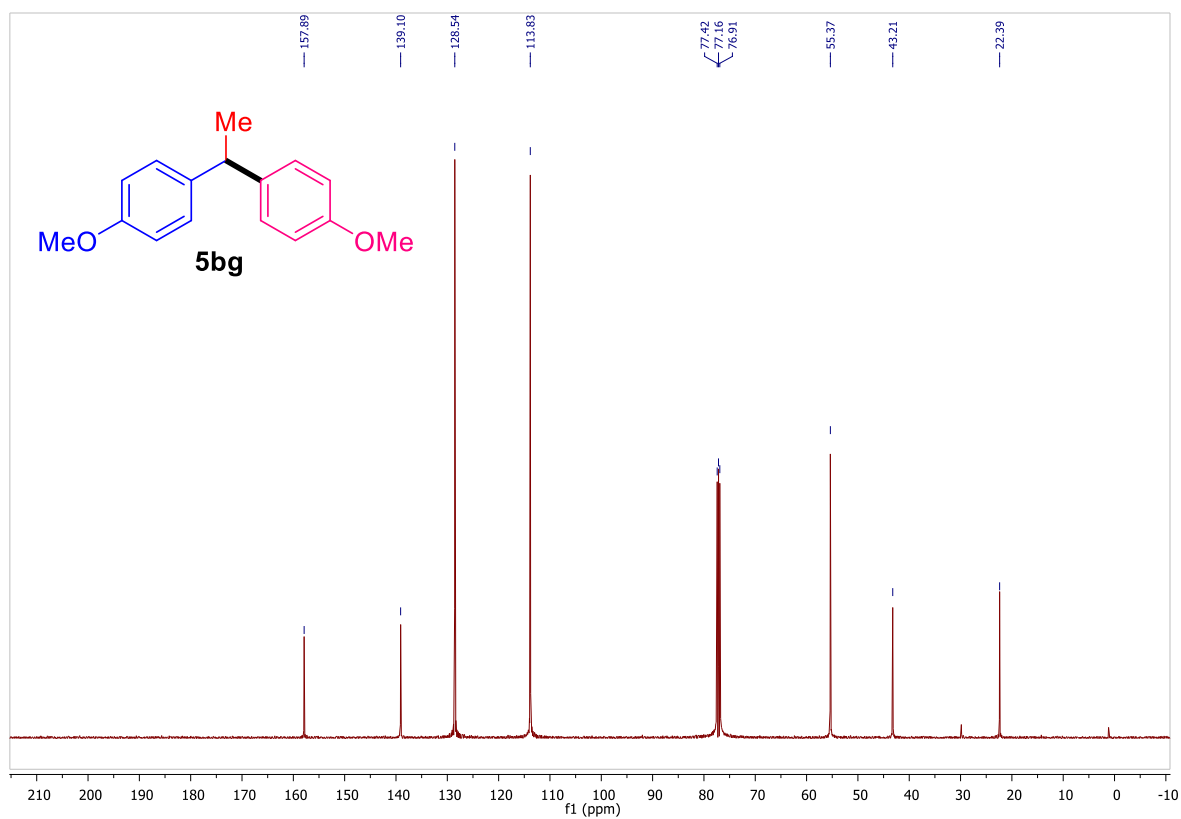

(S)-4-(1-(4-Methoxyphenyl) ethyl)-1,1'-biphenyl (**5bd**)

$^1\text{H}$  NMR (500 MHz,  $\text{CDCl}_3$ , 24 °C)

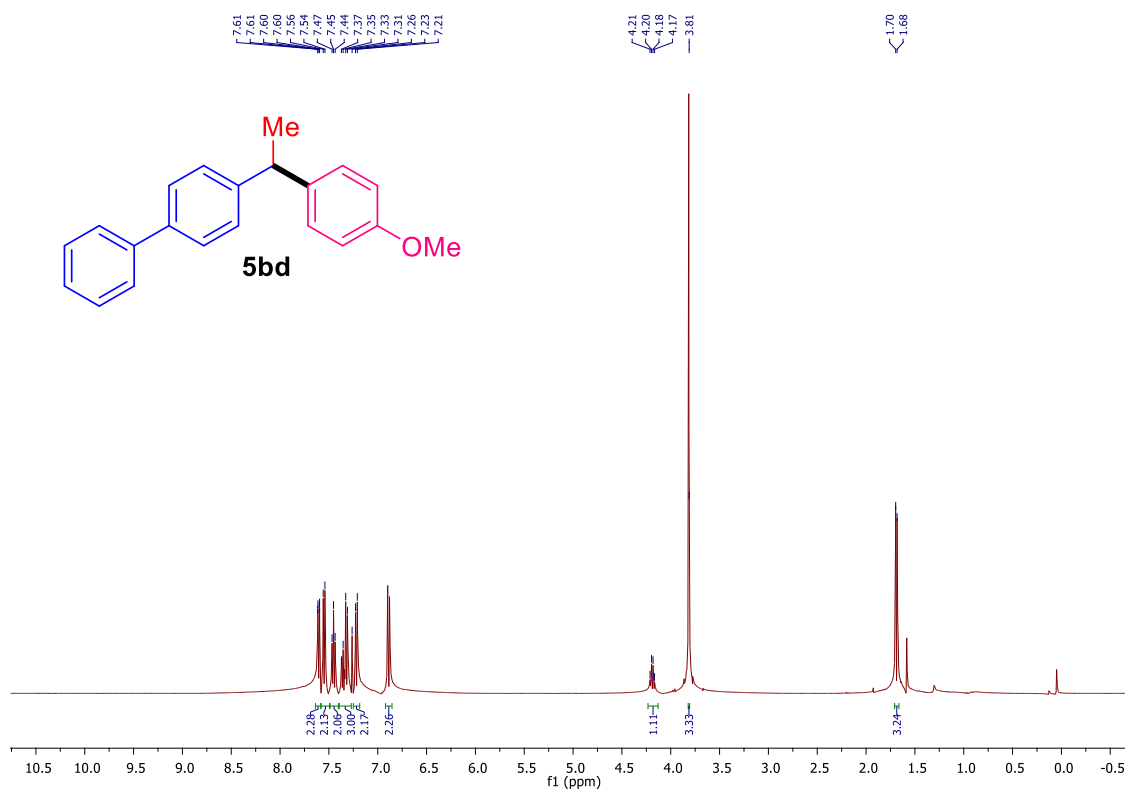

$^{13}\text{C}$   $\{^1\text{H}\}$  NMR (500 MHz,  $\text{CDCl}_3$ , 24 °C)

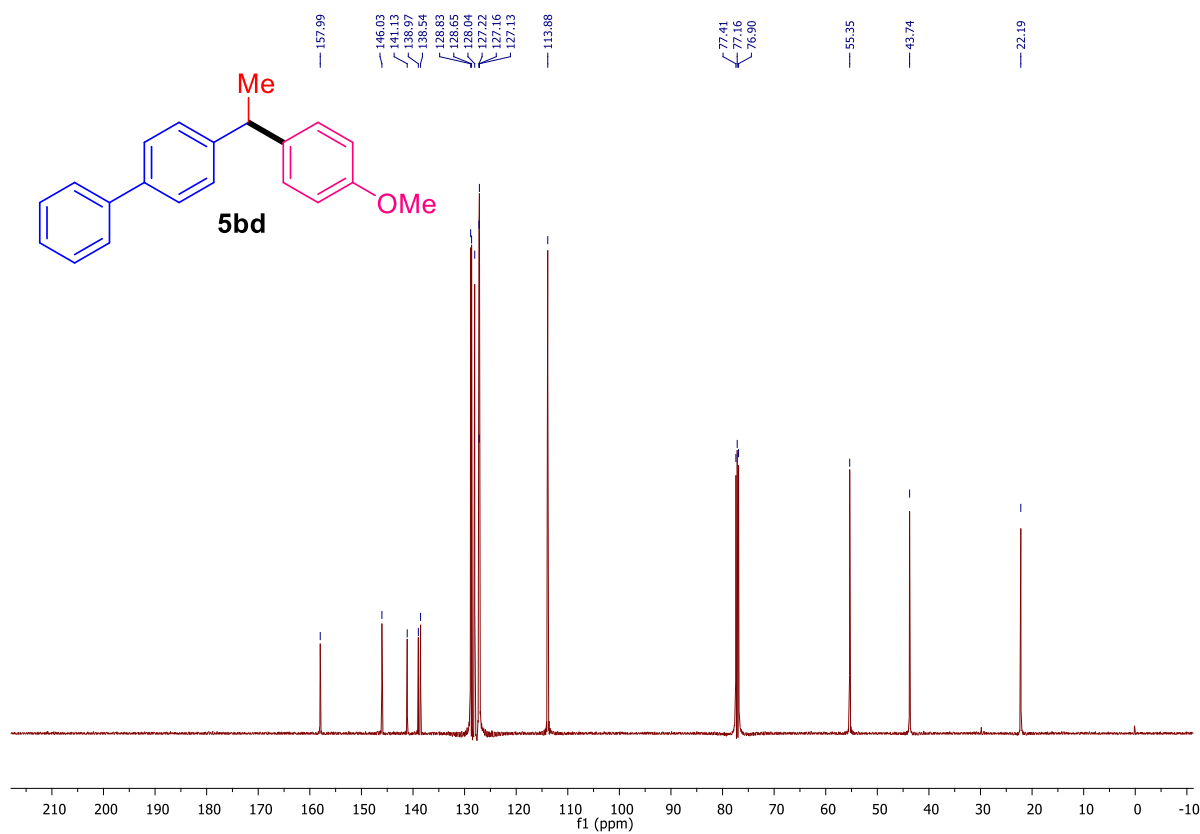

3-(1-Phenylethyl)-1H-indole (**5ca**)

$^1\text{H}$  NMR (500 MHz,  $\text{CDCl}_3$ , 24 °C)

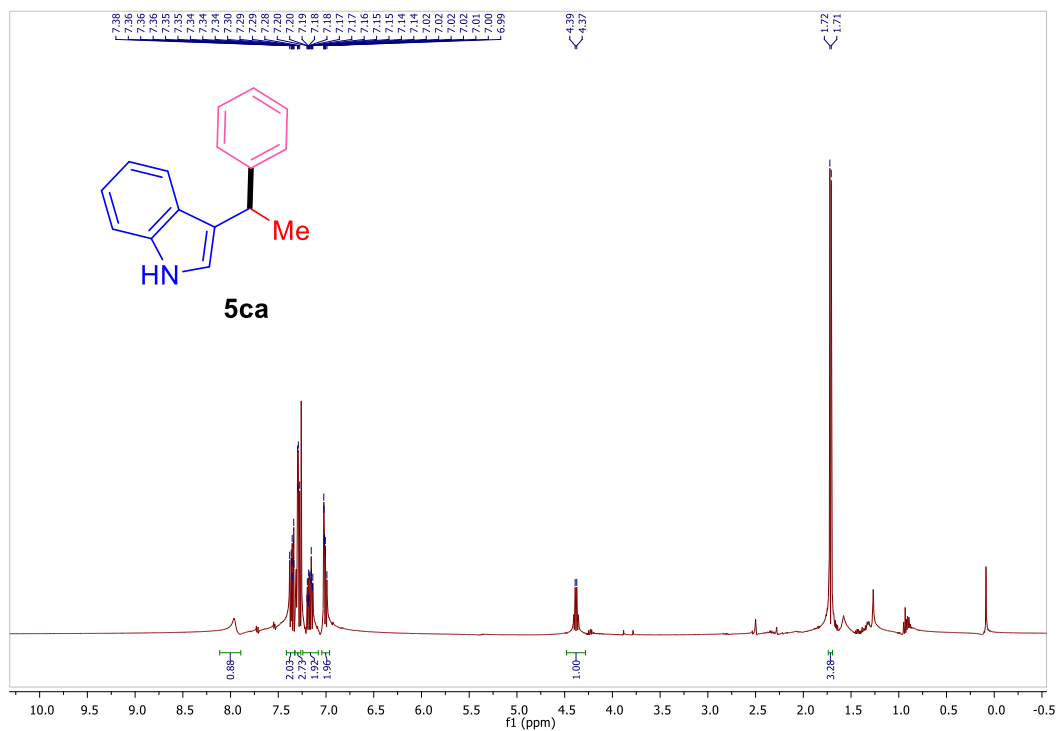

$^{13}\text{C}\{^1\text{H}\}$  NMR (126 MHz,  $\text{CDCl}_3$ , 24 °C)

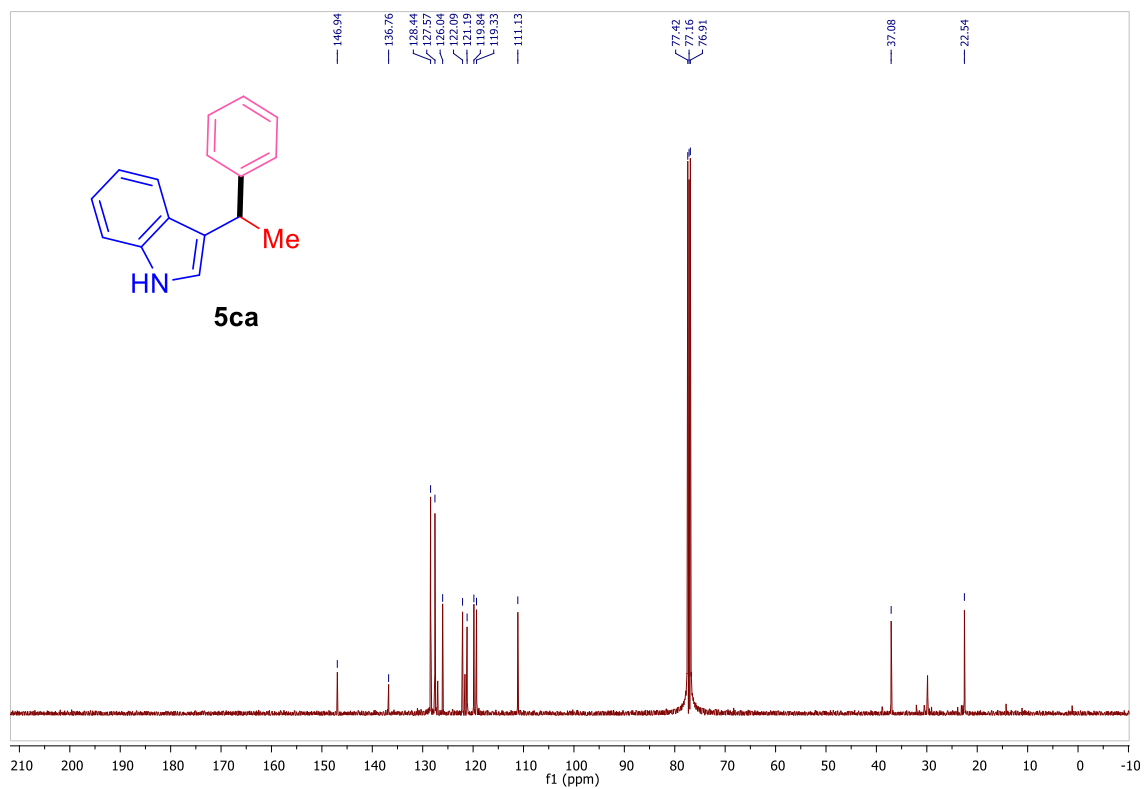

Bis(1,4-diarylmethylbenzene)

$^1\text{H}$  NMR (500 MHz,  $\text{CDCl}_3$ , 24 °C)

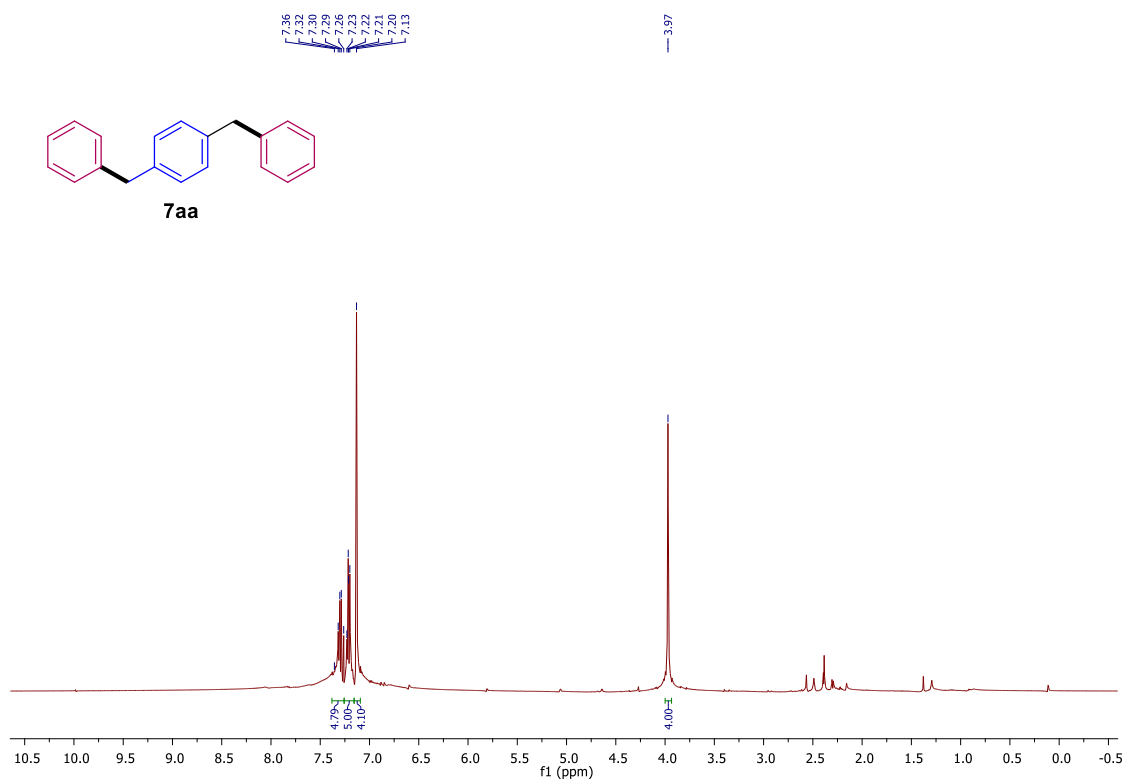

$^{13}\text{C}\{^1\text{H}\}$  NMR (126 MHz,  $\text{CDCl}_3$ , 24 °C)

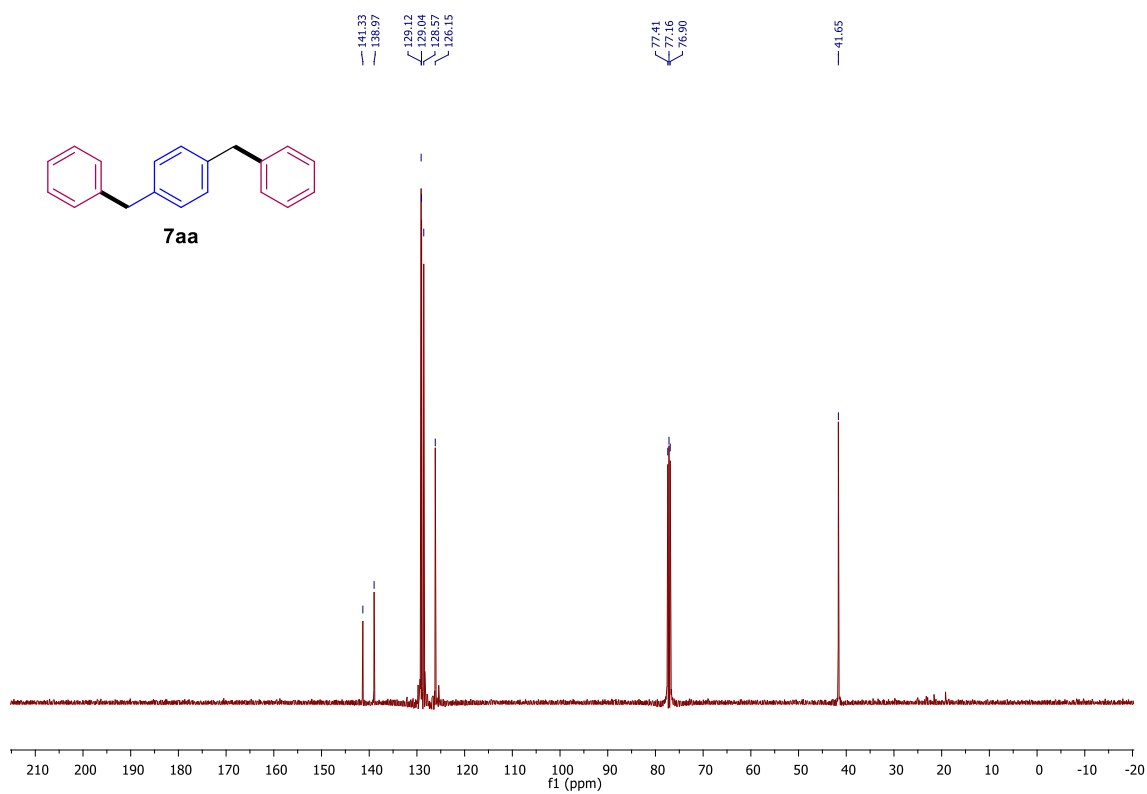

1,4-Bis(4-methoxybenzyl)benzene (**7ag**)

$^1\text{H}$  NMR (500 MHz,  $\text{CDCl}_3$ , 24 °C)

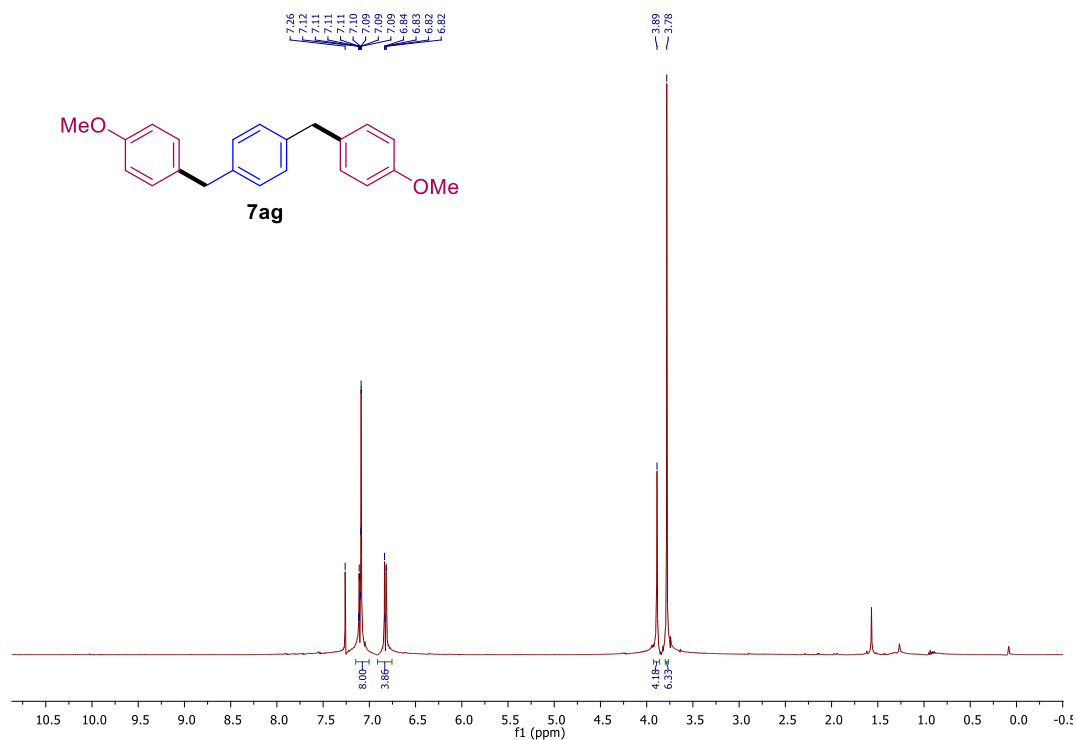

$^{13}\text{C}\{^1\text{H}\}$  NMR (126 MHz,  $\text{CDCl}_3$ , 24 °C)

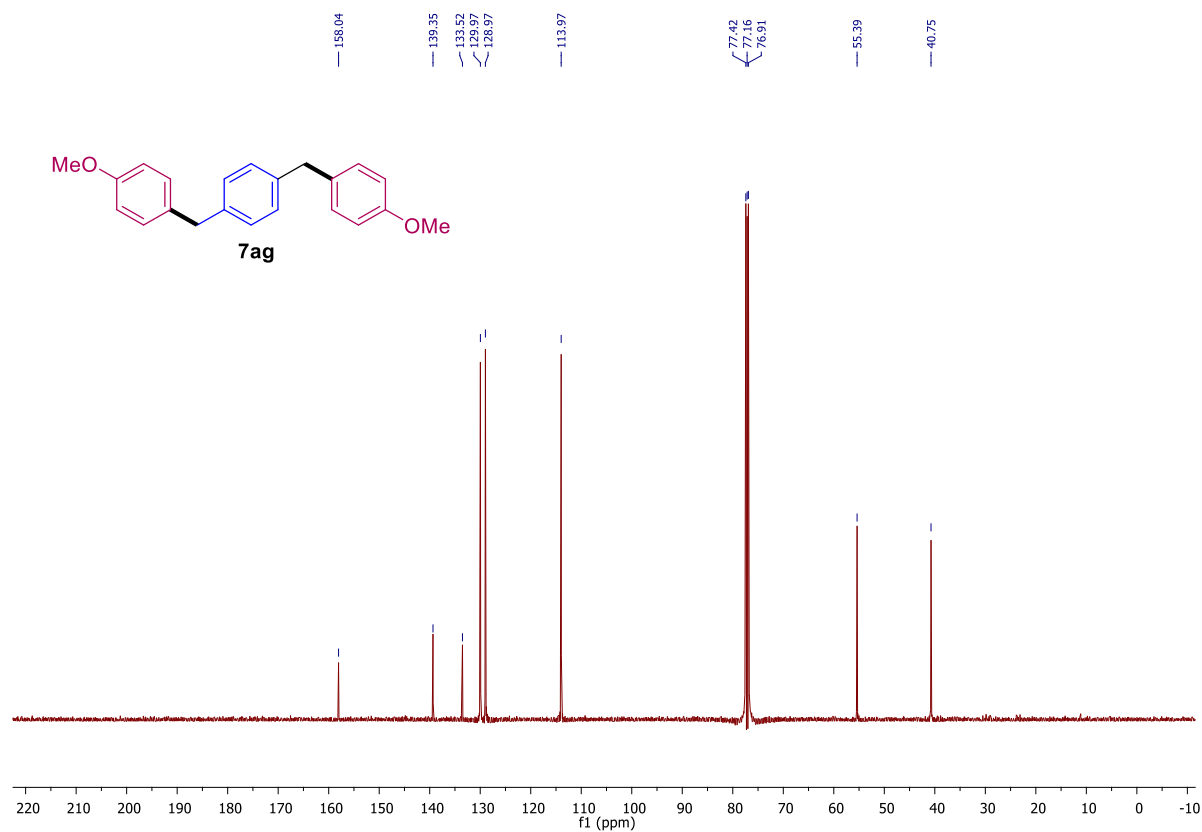

1,4-Bis(naphthalen-2-ylmethyl) benzene (**7an**)

$^1\text{H}$  NMR (500 MHz,  $\text{CDCl}_3$ , 24 °C)

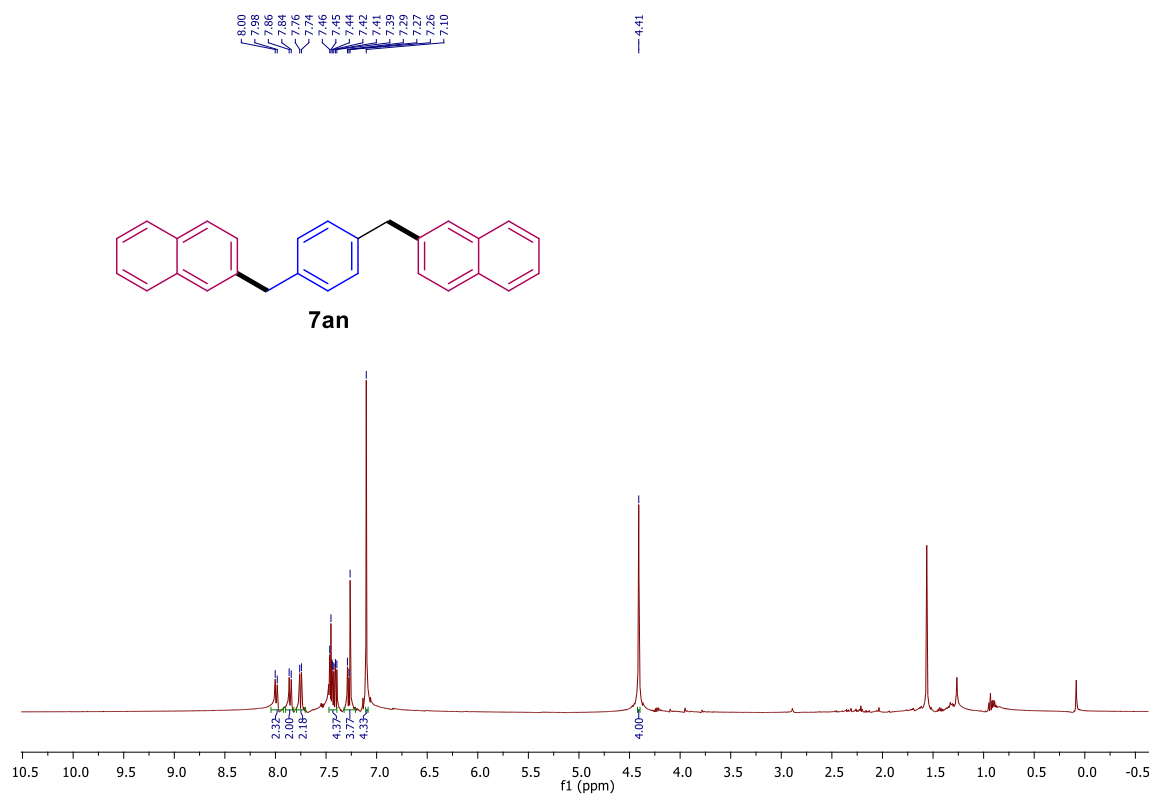

$^{13}\text{C}\{^1\text{H}\}$  NMR (126 MHz,  $\text{CDCl}_3$ , 24 °C)

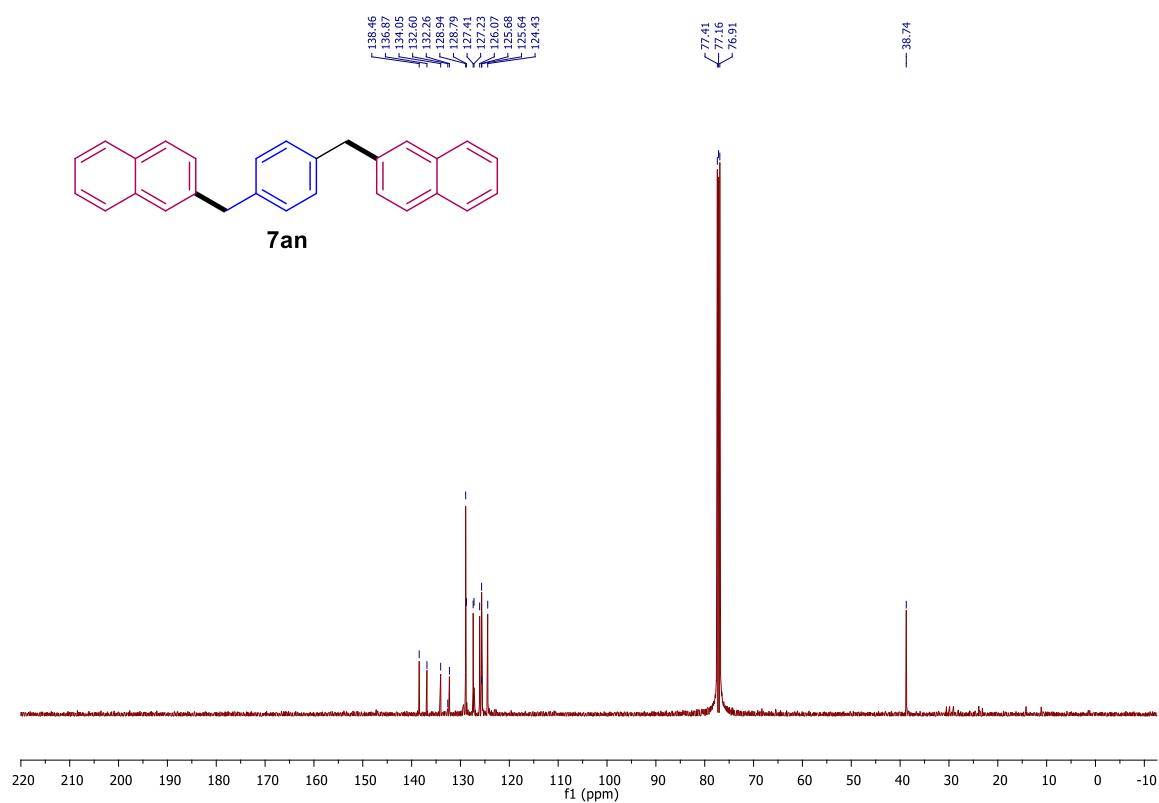

# Triphenylmethane (**9aa**)

$^1\text{H}$  NMR (500 MHz,  $\text{CDCl}_3$ , 24 °C)

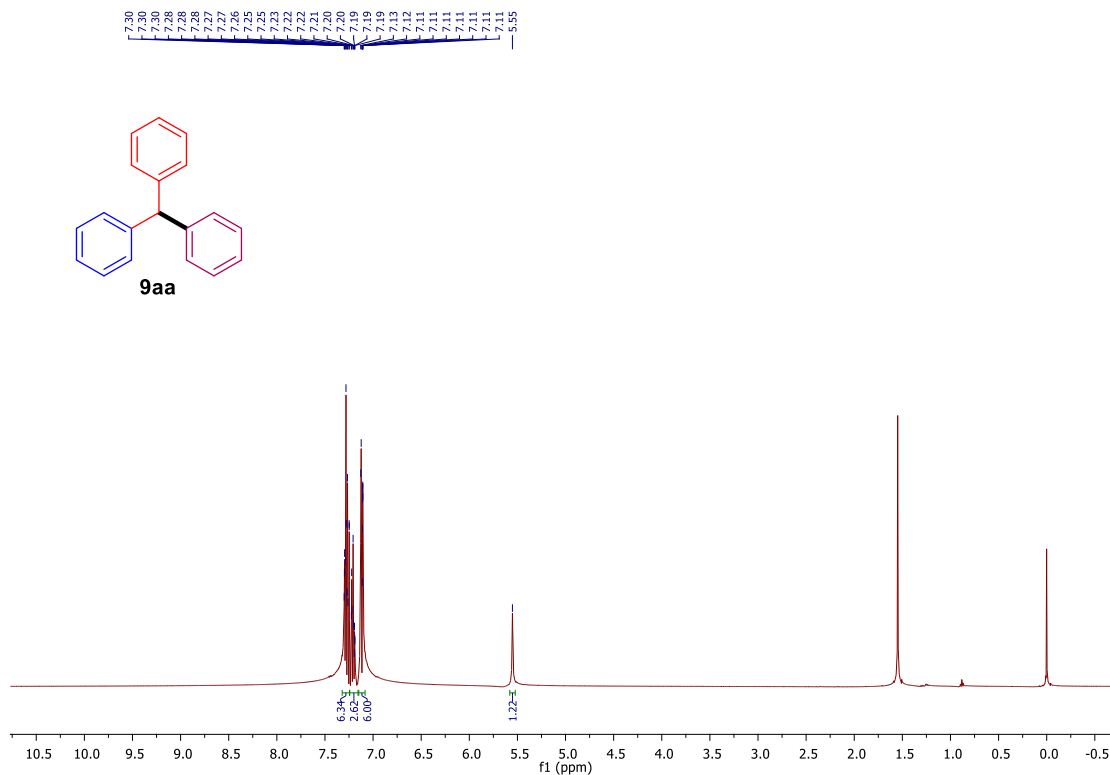

$^{13}\text{C}\{^1\text{H}\}$  NMR (126 MHz,  $\text{CDCl}_3$ , 24 °C)

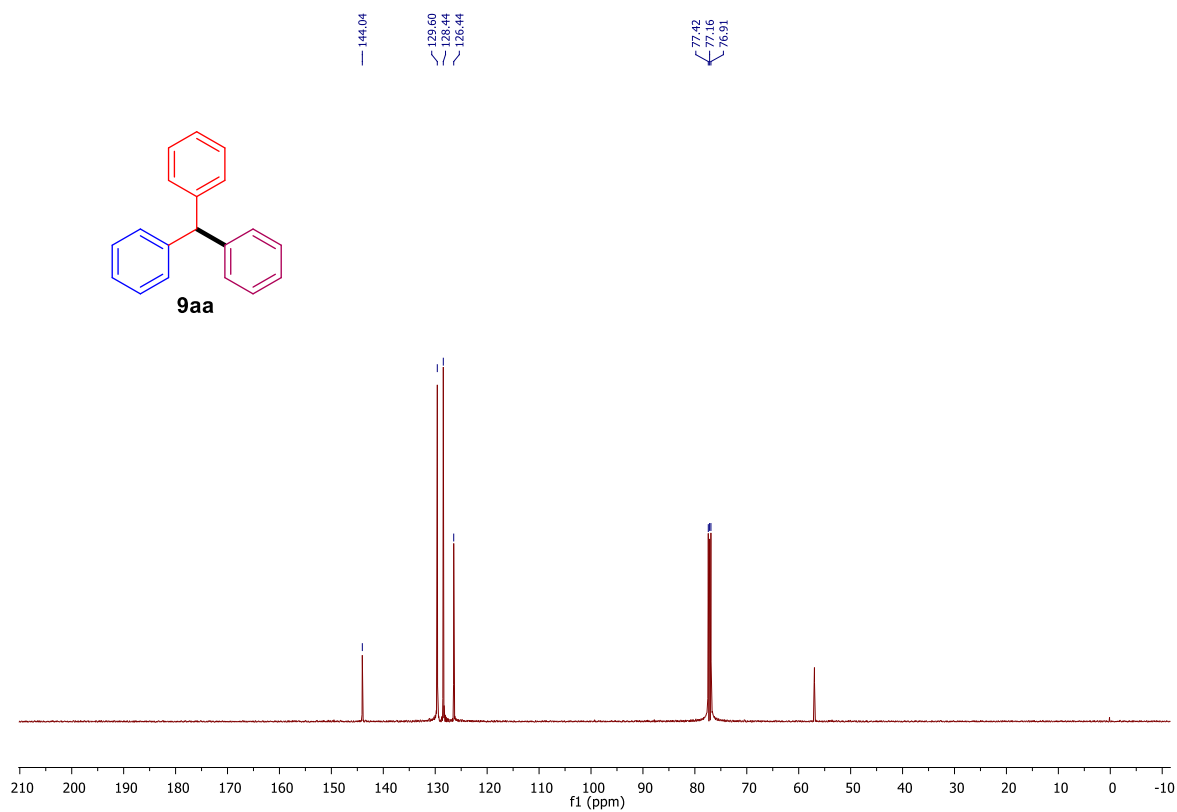



(*R*)-1-(4-Methoxyphenyl)-3-phenylpropan-1-ol (**13**)

$^1\text{H}$  NMR (500 MHz,  $\text{CDCl}_3$ , 24 °C)

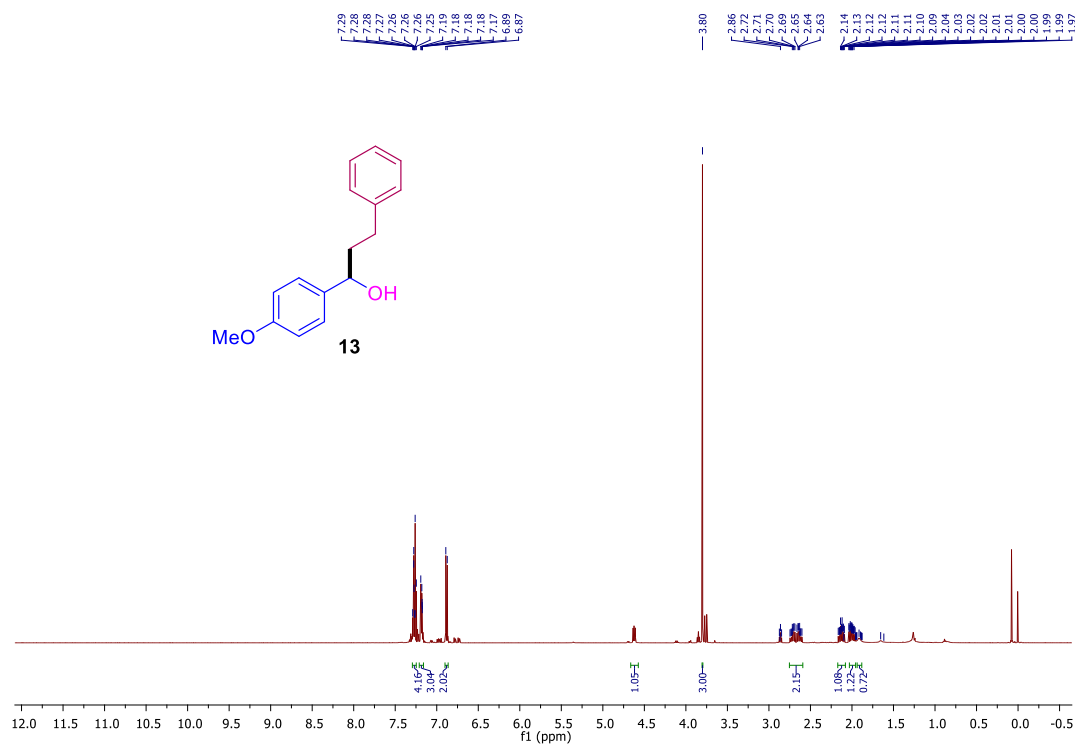

$^{13}\text{C}\{^1\text{H}\}$  NMR (126 MHz,  $\text{CDCl}_3$ , 24 °C)

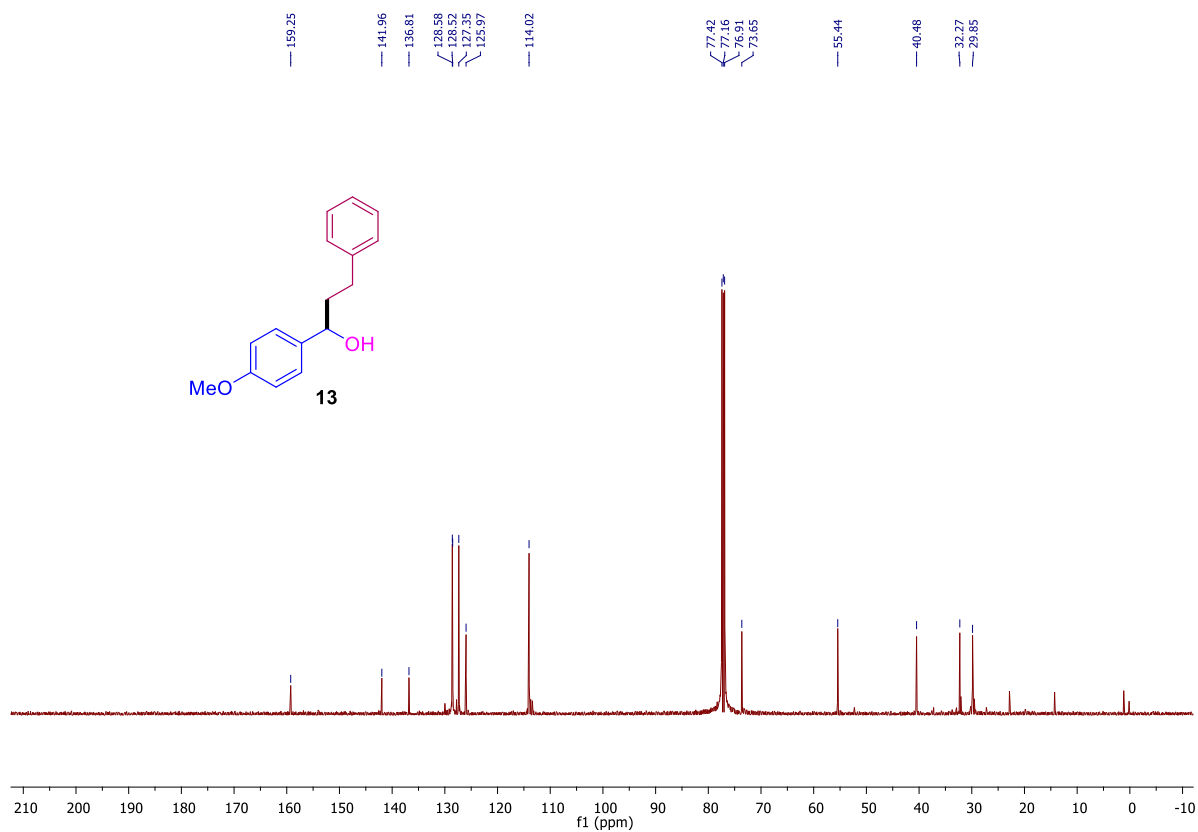

Supplement: d4cc00161c1.pdf [file d4cc00161c1.pdf]
